# Supplementary material for: Mitogenome Variations in a Global Population of Aspergillus fumigatus
Source: Preprints.org preprint supplement (doi:10.20944/preprints202309.0977.v1), 2023-09-15
Supplement: Supplementary file 1 [file supplementary]

## Sheet: supplementaryTable
Accession	BioSample	BioProject	Country	Continent	MLG	Mean cyp51A Depth	cyp51A Depth SD	Mean mtDNA Depth	mtDNA Depth SD	Mean Ratio	Est. Coverage	DOI
SRR11363404	SAMN13030870	PRJNA577646	-	-	Outgroup	-	-	-	-	-	-	SRA
DRR237583	SAMD00235920	PRJDB10244	Japan	Asia	78	123.851	13.6706	5176.72	271.394	41.7979	156.36	https://doi.org/10.1186/s12879-021-06279-1
DRR237582	SAMD00235919	PRJDB10244	Japan	Asia	67	94.2434	9.03085	4964.94	228.432	52.6821	124.415
DRR289668	SAMD00298542	PRJDB11554	Japan	Asia	3	144.563	15.6328	2056.34	173.249	14.2245	164.461	DOI: 10.1128/AAC.02657-20
DRR289670	SAMD00298544	PRJDB11554	Japan	Asia	3	118.054	10.537	2036.36	173.664	17.2494	137.757
DRR289669	SAMD00298543	PRJDB11554	Japan	Asia	3	144.193	9.85494	2511.48	226.958	17.4175	145.153
DRR289667	SAMD00298541	PRJDB11554	Japan	Asia	3	145.91	15.4196	2998.98	262.874	20.5535	158.175
DRR289666	SAMD00298540	PRJDB11554	Japan	Asia	3	136.998	16.0504	3111.28	288.558	22.7105	154.954
DRR290046	SAMD00319484	PRJDB11624	Japan	Asia	79	90.68	6.01308	1920.88	896.646	21.1831	105.546	DOI: 10.1111/myc.13370
DRR290042	SAMD00319480	PRJDB11624	Japan	Asia	78	89.4206	7.94864	2233.85	832.863	24.9813	102.057
DRR290039	SAMD00319477	PRJDB11624	Japan	Asia	79	77.2397	12.0275	1986.51	616.386	25.7188	89.2898
DRR290031	SAMD00319469	PRJDB11624	Japan	Asia	79	74.7332	6.22878	2062.02	829.177	27.5918	89.5877
DRR290043	SAMD00319481	PRJDB11624	Japan	Asia	78	75.5411	12.7861	2123	348.234	28.104	96.6127
DRR290040	SAMD00319478	PRJDB11624	Japan	Asia	79	76.4527	9.0988	2242.3	577.275	29.3292	90.5403
DRR290034	SAMD00319472	PRJDB11624	Japan	Asia	68	79.4009	12.7005	2425.56	307.761	30.5483	92.0183
DRR290037	SAMD00319475	PRJDB11624	Japan	Asia	79	68.1359	12.0702	2188.6	476.016	32.1211	87.7965
DRR290047	SAMD00319485	PRJDB11624	Japan	Asia	28	74.546	13.2075	2412.82	431.687	32.3669	91.6774
DRR290044	SAMD00319482	PRJDB11624	Japan	Asia	68	84.617	10.5301	2841.3	380.757	33.5783	106.574
DRR290041	SAMD00319479	PRJDB11624	Japan	Asia	78	65.0439	11.7372	2238.09	496.505	34.409	81.9148
DRR290032	SAMD00319470	PRJDB11624	Japan	Asia	67	92.7505	11.1295	3273.11	280.37	35.2895	107.864
DRR290038	SAMD00319476	PRJDB11624	Japan	Asia	79	71.5219	11.0776	2532.57	675.693	35.4096	89.5147
DRR290035	SAMD00319473	PRJDB11624	Japan	Asia	79	83.895	10.5535	3139.22	469.425	37.4184	95.3292
DRR290033	SAMD00319471	PRJDB11624	Japan	Asia	79	87.6251	8.91033	3357.73	298.703	38.3193	113.06
DRR290045	SAMD00319483	PRJDB11624	Japan	Asia	68	82.5312	13.35	3388.66	375.793	41.0591	107.908
DRR290036	SAMD00013549	PRJDB11624	Japan	Asia	78	79.4225	10.1215	3499.81	240.823	44.0657	104.635
DRR295873	SAMD00013555	PRJDB11643	Japan	Asia	79	54.0574	19.2071	201.524	165.1	3.72796	72.8654	DOI: 10.1111/1462-2920.15724
DRR290848	SAMD00322244	PRJDB11643	Netherlands	Europe	1	89.1952	15.2024	508.801	309.998	5.70436	137.28
DRR290854	SAMD00322250	PRJDB11643	Netherlands	Europe	1	81.7931	7.34518	476.338	284.436	5.8237	122.118
DRR290849	SAMD00322245	PRJDB11643	Netherlands	Europe	2	88.6121	11.2601	544.622	273.797	6.14614	128.947
DRR290852	SAMD00322248	PRJDB11643	Netherlands	Europe	2	80.4157	11.8404	525.506	305.009	6.53486	120.788
DRR290853	SAMD00322249	PRJDB11643	Netherlands	Europe	2	78.7301	19.1115	608.967	296.524	7.73487	122.788
DRR290850	SAMD00322246	PRJDB11643	Netherlands	Europe	2	85.3805	14.1056	660.749	420.603	7.73887	129.321
DRR295874	SAMD00013549	PRJDB11643	Japan	Asia	78	62.4571	20.3632	519.843	376.1	8.32321	81.9318
DRR290855	SAMD00322251	PRJDB11643	Netherlands	Europe	77	70.425	11.2964	647.362	333.059	9.19223	118.519
DRR295875	SAMD00013553	PRJDB11643	Japan	Asia	28	45.8054	17.1193	436.752	330.635	9.53494	68.2075
DRR290851	SAMD00322247	PRJDB11643	Netherlands	Europe	1	90.0784	13.7692	902.43	480.868	10.0183	125.773
DRR377377	SAMD00493151	PRJDB13659	Japan	Asia	38	167.474	16.1104	1292.63	1311.27	7.7184	220.168	https://doi.org/10.1007/s00294-022-01250-2
DRR377378	SAMD00493152	PRJDB13659	Japan	Asia	38	153.622	16.6836	5885.95	317.126	38.3145	211.561
DRR017555	SAMD00013553	PRJDB1541	Japan	Asia	28	9.23965	5.539	12.2897	17.5127	1.3301	8.63997	DOI: 10.1093/mmy/myv003
DRR015107	SAMD00013549	PRJDB1541	Japan	Asia	78	13.9172	5.14457	23.3368	32.3611	1.67683	12.2907
DRR017554	SAMD00013553	PRJDB1541	Japan	Asia	28	7.80111	2.55399	13.465	18.4893	1.72603	9.26055
DRR017535	SAMD00013550	PRJDB1541	Japan	Asia	79	9.72329	4.2071	23.6068	25.1341	2.42786	8.07749
DRR015108	SAMD00013549	PRJDB1541	Japan	Asia	78	5.09018	3.04527	13.3429	18.93	2.6213	6.78039
DRR015099	SAMD00013551	PRJDB1541	Japan	Asia	77	17.4923	4.65793	46.933	44.0357	2.68307	15.8003
DRR017536	SAMD00013550	PRJDB1541	Japan	Asia	79	6.47066	3.51558	17.7112	18.7086	2.73715	5.80512
DRR017537	SAMD00013550	PRJDB1541	Japan	Asia	79	6.66028	3.07379	19.9363	20.5768	2.99331	6.38822
DRR015098	SAMD00013551	PRJDB1541	Japan	Asia	77	3.95368	2.30595	13.3506	12.6653	3.37675	4.96304
DRR015106	SAMD00013554	PRJDB1541	Japan	Asia	79	28.9456	6.87524	104.92	73.4575	3.62474	29.0303
DRR015097	SAMD00013551	PRJDB1541	Japan	Asia	77	10.155	6.21365	36.9583	35.1534	3.6394	12.7794
DRR015101	SAMD00013544	PRJDB1541	Japan	Asia	28	7.33972	3.47525	28.8654	29.885	3.93277	6.63583
DRR015089	SAMD00013557	PRJDB1541	Japan	Asia	79	22.601	7.10317	91.9347	66.8036	4.06773	19.9964
DRR015096	SAMD00013546	PRJDB1541	Japan	Asia	79	22.601	7.10317	91.9347	66.8036	4.06773	19.9964
DRR017552	SAMD00013543	PRJDB1541	Japan	Asia	78	8.11365	2.78406	35.6153	36.29	4.38955	7.2006
DRR015105	SAMD00013554	PRJDB1541	Japan	Asia	79	18.0469	5.4569	81.7533	57.8237	4.53004	21.3408
DRR017560	SAMD00013559	PRJDB1541	Japan	Asia	79	7.31872	3.87055	34.8854	36.366	4.7666	6.29021
DRR015102	SAMD00013544	PRJDB1541	Japan	Asia	28	18.9036	5.4601	90.2511	92.4461	4.77427	20.7383
DRR015109	SAMD00013549	PRJDB1541	Japan	Asia	28	18.9036	5.4601	90.2511	92.4461	4.77427	20.7383
DRR017550	SAMD00013543	PRJDB1541	Japan	Asia	78	4.38295	2.08363	21.3973	22.8499	4.88193	5.28925
DRR015100	SAMD00013544	PRJDB1541	Japan	Asia	28	14.0049	3.84592	69.7503	74.6759	4.98041	16.3765
DRR017543	SAMD00013548	PRJDB1541	Japan	Asia	79	8.92588	3.98429	46.2255	36.2091	5.17882	6.90306
DRR017541	SAMD00013548	PRJDB1541	Japan	Asia	79	9.58122	3.8878	52.8384	41.625	5.51478	7.9102
DRR017551	SAMD00013543	PRJDB1541	Japan	Asia	78	6.99876	2.08503	40.0232	40.5359	5.71861	7.78573
DRR017542	SAMD00013548	PRJDB1541	Japan	Asia	79	7.22668	4.04607	42.514	33.2493	5.88291	6.10298
DRR017559	SAMD00013559	PRJDB1541	Japan	Asia	79	8.36875	3.2495	51.0456	53.8917	6.09955	9.73495
DRR017561	SAMD00013559	PRJDB1541	Japan	Asia	79	5.30821	3.78381	33.3958	36.6554	6.29134	6.24782
DRR017547	SAMD00013547	PRJDB1541	Japan	Asia	79	12.1958	5.12784	82.5677	57.0988	6.77017	9.03576
DRR015093	SAMD00013552	PRJDB1541	Japan	Asia	38	20.8703	6.05908	175.295	111.123	8.39927	22.244
DRR015112	SAMD00013558	PRJDB1541	Japan	Asia	79	18.328	6.96108	155.843	91.3028	8.50301	17.5275
DRR017548	SAMD00013547	PRJDB1541	Japan	Asia	79	7.021	3.17235	62.4178	43.2385	8.89016	6.0385
DRR015092	SAMD00013552	PRJDB1541	Japan	Asia	38	15.1377	4.64489	138.936	88.5089	9.17812	16.7633
DRR017539	SAMD00013545	PRJDB1541	Japan	Asia	36	10.9463	5.01274	109.646	79.2367	10.0168	9.97966
DRR017549	SAMD00013547	PRJDB1541	Japan	Asia	79	6.22668	3.77912	65.8432	45.4926	10.5744	6.68103
DRR017538	SAMD00013545	PRJDB1541	Japan	Asia	36	3.70846	1.97268	42.2277	30.3918	11.3869	4.33572
DRR017540	SAMD00013545	PRJDB1541	Japan	Asia	36	7.49969	3.29463	93.8712	67.7313	12.5167	8.98771
DRR017545	SAMD00013555	PRJDB1541	Japan	Asia	79	7.89809	3.1053	118.02	60.5027	14.9428	6.32752
DRR015111	SAMD00013558	PRJDB1541	Japan	Asia	79	3.61334	2.89793	59.9818	30.2264	16.6001	3.37142
DRR015110	SAMD00013558	PRJDB1541	Japan	Asia	79	17.4608	4.76871	302.193	136.184	17.307	17.8985
DRR017546	SAMD00013555	PRJDB1541	Japan	Asia	79	5.98888	2.73419	111.339	56.6937	18.591	6.21343
DRR017544	SAMD00013555	PRJDB1541	Japan	Asia	79	7.7344	3.59953	151.949	75.4447	19.6458	8.54168
DRR022924	SAMD00019246	PRJDB3064	Japan	Asia	79	13.3014	4.45087	98.6286	159.082	7.4149	12.7922	DOI: 10.1128/JCM.01105-14
DRR022920	SAMD00019244	PRJDB3064	Japan	Asia	79	25.6485	6.9052	694.461	301.853	27.0761	25.0634
DRR022916	SAMD00019242	PRJDB3064	Japan	Asia	79	7.98085	3.30546	221.655	109.047	27.7733	9.13534
DRR022919	SAMD00019244	PRJDB3064	Japan	Asia	79	15.2959	4.27827	427.339	103.291	27.9382	11.4502
DRR022918	SAMD00019243	PRJDB3064	Japan	Asia	79	13.2143	4.99658	433.046	204.396	32.771	13.4119
DRR022921	SAMD00019245	PRJDB3064	Japan	Asia	79	12.1118	4.16047	421.164	115.348	34.7731	11.5083
DRR022915	SAMD00019242	PRJDB3064	Japan	Asia	79	21.7653	8.35436	859.162	161.977	39.474	22.8277
DRR022923	SAMD00019246	PRJDB3064	Japan	Asia	79	12.0259	5.23625	496.033	129.489	41.2469	10.0195
DRR022917	SAMD00019243	PRJDB3064	Japan	Asia	68	14.8431	6.48256	667.884	138.552	44.9962	16.1829
DRR022926	SAMD00019248	PRJDB3064	Japan	Asia	77	18.1989	5.13417	822.889	124.864	45.2165	20.9764
DRR022922	SAMD00019245	PRJDB3064	Japan	Asia	79	2.11736	2.23271	105.332	46.4494	49.747	3.36999
DRR022927	SAMD00019249	PRJDB3064	Japan	Asia	66	12.3385	3.88354	635.808	105.622	51.5305	15.4198
DRR022925	SAMD00019247	PRJDB3064	Japan	Asia	77	14.6387	4.60247	758.84	174.485	51.8381	21.7331
DRR032624	SAMD00028353	PRJDB3633	Iran	Asia	33	35.2427	5.89471	1519.77	433.453	43.1229	44.3172	DOI: 10.1099/jmm.0.47319-0
DRR032500	SAMD00028353	PRJDB3633	Iran	Asia	32	156.366	21.1033	8603.27	1650.13	55.02	157.343
DRR146814	SAMD00133782	PRJDB7240	Brazil	South America	3	36.5695	6.20463	812.556	245.474	22.2195	38.0168	DOI: 10.3389/fmicb.2019.00854
ERR232423	SAMEA2051887	PRJEB1497	United Kingdom	Europe	43	40.5689	10.403	2122.54	451.501	52.3194	49.5195	DOI: https://doi.org/10.1128/msphere.01250-20
ERR232428	SAMEA2052099	PRJEB1497	United Kingdom	Europe	44	43.105	11.1911	2551.22	542.722	59.1862	47.532
ERR9791598	SAMEA14478974	PRJEB27135	United Kingdom	Europe	1	23.7554	5.70349	44.953	9.7912	1.89233	23.7331	https://doi.org/10.1038/s41564-022-01091-2
ERR9791608	SAMEA14478984	PRJEB27135	United Kingdom	Europe	79	20.6535	4.41067	62.4807	17.8383	3.02519	28.9808
ERR9791605	SAMEA14478981	PRJEB27135	United Kingdom	Europe	4	21.8406	4.97167	72.3838	18.104	3.31418	27.1253
ERR9791600	SAMEA14478976	PRJEB27135	United Kingdom	Europe	77	18.1538	4.10061	60.7351	12.307	3.34558	25.9845
ERR9791604	SAMEA14478980	PRJEB27135	United Kingdom	Europe	4	18.4552	3.55545	65.087	14.2648	3.52675	27.2964
ERR9791594	SAMEA14478970	PRJEB27135	United Kingdom	Europe	11	27.1167	4.54839	101.253	17.5176	3.73398	29.4378
ERR9791587	SAMEA14478963	PRJEB27135	United Kingdom	Europe	77	22.5133	4.67685	84.92	16.2844	3.77199	26.9562
ERR9791597	SAMEA14478973	PRJEB27135	United Kingdom	Europe	2	17.3545	4.66945	71.8339	15.1784	4.1392	23.3798
ERR9791599	SAMEA14478975	PRJEB27135	United Kingdom	Europe	11	21.4935	5.11769	99.0615	19.6184	4.6089	23.414
ERR9791607	SAMEA14478983	PRJEB27135	United Kingdom	Europe	4	29.1915	5.2857	146.19	43.8007	5.00796	29.7591
ERR9791584	SAMEA14478960	PRJEB27135	United Kingdom	Europe	1	29.9426	7.17207	226.412	68.3459	7.56156	31.3129
ERR9791593	SAMEA14478969	PRJEB27135	United Kingdom	Europe	77	17.6516	4.96972	134.695	22.0607	7.63074	25.8826
ERR9791586	SAMEA14478962	PRJEB27135	United Kingdom	Europe	77	29.601	5.848	226.115	55.7737	7.63878	31.6759
ERR9791756	SAMEA14479132	PRJEB27135	Ireland	Europe	79	36.6609	7.46599	314.812	54.5161	8.58714	35.3394
ERR9791585	SAMEA14478961	PRJEB27135	United Kingdom	Europe	77	20.5874	5.15737	181.164	30.1452	8.79977	28.2095
ERR9791768	SAMEA14479144	PRJEB27135	Ireland	Europe	9	44.1538	6.38615	402.169	77.7845	9.10837	44.273
ERR9791625	SAMEA14479001	PRJEB27135	Ireland	Europe	60	34.2934	5.71369	362.134	80.5135	10.5599	30.9567
ERR9791606	SAMEA14478982	PRJEB27135	United Kingdom	Europe	75	26.4509	4.82531	289.871	43.7808	10.9588	30.1478
ERR9791610	SAMEA14478986	PRJEB27135	Ireland	Europe	75	33.3552	5.14492	371.766	52.2538	11.1457	32.3539
ERR9791596	SAMEA14478972	PRJEB27135	United Kingdom	Europe	11	20.4206	3.86888	233.028	54.8245	11.4114	25.2044
ERR9791582	SAMEA14478958	PRJEB27135	United Kingdom	Europe	2	28.6245	4.23518	336.604	43.2233	11.7593	30.2548
ERR9791767	SAMEA14479143	PRJEB27135	Ireland	Europe	9	33.9636	4.34419	411.594	79.0406	12.1187	40.5278
ERR9791641	SAMEA14479017	PRJEB27135	Ireland	Europe	60	32.231	6.22307	407.632	92.2253	12.6472	30.3106
ERR9791619	SAMEA14478995	PRJEB27135	Ireland	Europe	79	34.0883	6.66478	435.104	53.6044	12.764	35.5351
ERR9791754	SAMEA14479130	PRJEB27135	Ireland	Europe	11	26.9148	5.70127	345.139	53.4587	12.8234	29.1635
ERR9791611	SAMEA14478987	PRJEB27135	Ireland	Europe	79	27.0976	4.83719	352.353	58.5605	13.0031	28.3293
ERR9791758	SAMEA14479134	PRJEB27135	United Kingdom	Europe	11	42.2174	7.89241	557.822	105.501	13.2131	43.7593
ERR9791626	SAMEA14479002	PRJEB27135	Ireland	Europe	69	32.6788	4.22124	437.316	96.2593	13.3823	32.5483
ERR9791579	SAMEA14478955	PRJEB27135	United Kingdom	Europe	2	28.4064	5.85235	381.68	79.6976	13.4364	29.571
ERR9791647	SAMEA14479023	PRJEB27135	Ireland	Europe	11	37.0167	6.18756	501.789	56.6119	13.5558	34.2892
ERR9791580	SAMEA14478956	PRJEB27135	United Kingdom	Europe	4	29.4577	2.86661	402.349	54.353	13.6585	31.1111
ERR9791640	SAMEA14479016	PRJEB27135	Ireland	Europe	60	27.9314	5.43914	381.935	85.4534	13.674	26.5458
ERR9791581	SAMEA14478957	PRJEB27135	United Kingdom	Europe	11	26.113	4.84432	361.253	45.7151	13.8342	29.1579
ERR9791573	SAMEA14478949	PRJEB27135	United Kingdom	Europe	77	28.7078	5.9132	399.466	56.7606	13.9149	26.9492
ERR9791574	SAMEA14478950	PRJEB27135	United Kingdom	Europe	2	26.0093	5.50036	362.468	50.8467	13.9361	25.8425
ERR9791755	SAMEA14479131	PRJEB27135	Ireland	Europe	11	30.0191	5.01619	419.343	83.2804	13.9692	30.6416
ERR9791575	SAMEA14478951	PRJEB27135	United Kingdom	Europe	77	27.8938	4.57972	391.144	55.9484	14.0226	27.7685
ERR9791643	SAMEA14479019	PRJEB27135	Ireland	Europe	75	34.8703	6.80947	495.564	64.9075	14.2116	32.3408
ERR9791577	SAMEA14478953	PRJEB27135	United Kingdom	Europe	2	25.6714	4.27798	367.484	48.8568	14.3149	26.3736
ERR9791612	SAMEA14478988	PRJEB27135	Ireland	Europe	79	28.176	4.49604	413.508	63.0721	14.6759	28.2977
ERR9791572	SAMEA14478948	PRJEB27135	United Kingdom	Europe	11	30.2526	5.85262	447.718	64.7761	14.7993	29.8719
ERR9791576	SAMEA14478952	PRJEB27135	United Kingdom	Europe	11	28.9586	5.3511	430.731	55.3674	14.874	30.3481
ERR9791636	SAMEA14479012	PRJEB27135	Ireland	Europe	79	25.3607	5.56184	380.104	56.2348	14.9879	25.0026
ERR9791655	SAMEA14479031	PRJEB27135	Ireland	Europe	2	28.3842	4.19731	435.048	48.1892	15.3271	30.8587
ERR9791766	SAMEA14479142	PRJEB27135	United Kingdom	Europe	76	32.7282	4.29724	502.095	41.5412	15.3414	38.4832
ERR9791578	SAMEA14478954	PRJEB27135	United Kingdom	Europe	77	25.9376	4.06397	399.077	55.9111	15.386	28.15
ERR9791689	SAMEA14479065	PRJEB27135	United Kingdom	Europe	38	38.5769	6.20604	598.048	75.3106	15.5027	24.3952
ERR9791759	SAMEA14479135	PRJEB27135	United Kingdom	Europe	79	39.5831	4.56674	618.958	114.193	15.6369	41.7039
ERR9791614	SAMEA14478990	PRJEB27135	Ireland	Europe	79	25.6763	4.11413	404.701	59.6877	15.7616	25.9262
ERR9791603	SAMEA14478979	PRJEB27135	United Kingdom	Europe	75	28.2742	6.07067	446.24	74.7289	15.7826	27.1394
ERR9791571	SAMEA14478947	PRJEB27135	United Kingdom	Europe	77	21.5911	4.05168	347.774	50.0876	16.1073	25.6539
ERR9791595	SAMEA14478971	PRJEB27135	United Kingdom	Europe	11	21.1279	3.92549	340.629	44.4999	16.1223	21.753
ERR9791642	SAMEA14479018	PRJEB27135	Ireland	Europe	75	30.7122	6.2005	498.732	66.4328	16.2389	29.8368
ERR9791775	SAMEA14479151	PRJEB27135	Ireland	Europe	11	35.5324	6.02257	581.835	35.0809	16.3748	37.5981
ERR9791617	SAMEA14478993	PRJEB27135	Ireland	Europe	79	26.6708	5.54806	459.469	68.8611	17.2274	30.0797
ERR9791772	SAMEA14479148	PRJEB27135	Ireland	Europe	11	43.0896	5.31156	747.84	48.4913	17.3555	46.0283
ERR9791609	SAMEA14478985	PRJEB27135	Ireland	Europe	75	29.2915	6.50066	508.611	70.866	17.3638	30.4652
ERR9791654	SAMEA14479030	PRJEB27135	Ireland	Europe	11	33.2903	6.42757	581.338	66.5585	17.4627	30.1677
ERR9791764	SAMEA14479140	PRJEB27135	United Kingdom	Europe	79	32.404	5.74272	567.926	39.8897	17.5264	40.5412
ERR9791661	SAMEA14479037	PRJEB27135	Ireland	Europe	1	26.3749	5.16139	476.117	57.3348	18.0519	28.2205
ERR9791660	SAMEA14479036	PRJEB27135	Ireland	Europe	1	31.2199	4.25281	566.361	73.5127	18.141	31.1578
ERR9791771	SAMEA14479147	PRJEB27135	Ireland	Europe	1	41.3317	6.54191	756.253	51.274	18.2972	41.8503
ERR9791730	SAMEA14479106	PRJEB27135	United Kingdom	Europe	79	26.1316	4.18596	478.868	60.9013	18.3253	27.7361
ERR9791649	SAMEA14479025	PRJEB27135	Ireland	Europe	11	31.1445	5.33015	573.948	66.0904	18.4285	32.8986
ERR9791769	SAMEA14479145	PRJEB27135	United Kingdom	Europe	11	37.8796	4.96984	702.407	54.0318	18.5432	39.3679
ERR9791663	SAMEA14479039	PRJEB27135	Ireland	Europe	79	38.5324	7.4846	714.631	100.975	18.5462	32.1045
ERR9791630	SAMEA14479006	PRJEB27135	Ireland	Europe	9	28.7752	4.11081	534.972	116.523	18.5915	29.68
ERR9791659	SAMEA14479035	PRJEB27135	Ireland	Europe	1	26.8104	4.42593	498.533	61.9628	18.5948	28.6871
ERR9791761	SAMEA14479137	PRJEB27135	United Kingdom	Europe	5	35.5028	5.19513	661.269	43.0541	18.6258	38.4768
ERR9791638	SAMEA14479014	PRJEB27135	Ireland	Europe	77	26.559	4.74381	496.504	66.9889	18.6944	28.4209
ERR9791623	SAMEA14478999	PRJEB27135	Ireland	Europe	79	24.2143	4.4974	453.217	65.8765	18.7169	28.4111
ERR9791629	SAMEA14479005	PRJEB27135	Ireland	Europe	7	28.7066	6.31936	543.14	118.074	18.9204	27.9935
ERR9791780	SAMEA14479156	PRJEB27135	United Kingdom	Europe	79	42.4966	8.38072	809.665	52.482	19.0525	45.2709
ERR9791656	SAMEA14479032	PRJEB27135	Ireland	Europe	1	32.7313	4.2585	625.083	73.4093	19.0974	33.7762
ERR9791631	SAMEA14479007	PRJEB27135	Ireland	Europe	9	28.3064	5.32469	540.675	117.651	19.1008	30.1044
ERR9791601	SAMEA14478977	PRJEB27135	United Kingdom	Europe	77	22.0148	4.49692	421.612	58.6408	19.1513	27.1515
ERR9791657	SAMEA14479033	PRJEB27135	Ireland	Europe	2	28.1365	4.84767	539.804	65.2513	19.1852	31.5244
ERR9791648	SAMEA14479024	PRJEB27135	Ireland	Europe	1	35.3694	6.08759	682.87	81.4344	19.3068	34.3949
ERR9791627	SAMEA14479003	PRJEB27135	Ireland	Europe	7	23.9771	5.00964	463.421	102.305	19.3276	26.2847
ERR9791651	SAMEA14479027	PRJEB27135	Ireland	Europe	11	24.3687	4.3288	472.224	58.0634	19.3782	27.4166
ERR9791635	SAMEA14479011	PRJEB27135	Ireland	Europe	11	24.0556	4.41714	469.292	57.4656	19.5087	27.1276
ERR9791658	SAMEA14479034	PRJEB27135	Ireland	Europe	1	27.8338	4.57693	543.214	65.3927	19.5163	30.6863
ERR9791618	SAMEA14478994	PRJEB27135	Ireland	Europe	79	29.5454	4.13459	576.794	71.2709	19.5223	31.8971
ERR9791757	SAMEA14479133	PRJEB27135	Ireland	Europe	11	30.3422	6.27907	592.831	74.7362	19.5382	34.8699
ERR9791765	SAMEA14479141	PRJEB27135	United Kingdom	Europe	75	32.4367	5.24965	634.297	49.7269	19.5549	39.8167
ERR9791703	SAMEA14479079	PRJEB27135	United Kingdom	Europe	77	26.1686	5.76127	514.085	57.0699	19.6451	27.7414
ERR9791662	SAMEA14479038	PRJEB27135	Ireland	Europe	36	29.601	4.35395	582.618	72.0989	19.6824	30.5007
ERR9791773	SAMEA14479149	PRJEB27135	Ireland	Europe	1	36.6356	6.57161	722.365	54.5432	19.7176	39.1925
ERR9791639	SAMEA14479015	PRJEB27135	Ireland	Europe	77	23.2174	5.239	465.498	60.7805	20.0495	26.3613
ERR9791763	SAMEA14479139	PRJEB27135	United Kingdom	Europe	60	33.0037	5.07094	666.076	130.968	20.1819	40.3924
ERR9791644	SAMEA14479020	PRJEB27135	Ireland	Europe	11	37.2952	4.74067	753.63	85.5567	20.2071	35.8003
ERR9791645	SAMEA14479021	PRJEB27135	Ireland	Europe	38	31.2619	4.14679	632.39	69.2866	20.2288	31.0303
ERR9791624	SAMEA14479000	PRJEB27135	Ireland	Europe	79	32.1309	5.59988	658.981	87.3271	20.5092	34.0873
ERR9791652	SAMEA14479028	PRJEB27135	Ireland	Europe	77	34.8098	4.53372	716.416	93.3552	20.5809	34.772
ERR9791628	SAMEA14479004	PRJEB27135	Ireland	Europe	6	26.3675	4.72313	546.387	120.003	20.722	31.1561
ERR9791736	SAMEA14479112	PRJEB27135	United Kingdom	Europe	19	34.4923	4.4174	718.417	158.851	20.8283	32.9003
ERR9791615	SAMEA14478991	PRJEB27135	Ireland	Europe	79	29.7597	4.47487	620.289	88.7561	20.8432	28.0275
ERR9791637	SAMEA14479013	PRJEB27135	Ireland	Europe	66	22.7912	3.66467	475.515	62.145	20.864	25.9685
ERR9791733	SAMEA14479109	PRJEB27135	United Kingdom	Europe	11	30.525	6.77621	638.025	67.8605	20.9017	31.5705
ERR9791679	SAMEA14479055	PRJEB27135	United Kingdom	Europe	79	24.16	4.528	508.987	57.3734	21.0674	26.1104
ERR9791693	SAMEA14479069	PRJEB27135	United Kingdom	Europe	78	24.0469	4.25228	508.346	59.65	21.1398	25.8233
ERR9791583	SAMEA14478959	PRJEB27135	United Kingdom	Europe	1	35.139	5.69419	744.946	91.0283	21.2	32.2906
ERR9791590	SAMEA14478966	PRJEB27135	United Kingdom	Europe	77	25.9524	4.80326	558.858	73.0778	21.5339	29.3856
ERR9791686	SAMEA14479062	PRJEB27135	United Kingdom	Europe	76	22.575	4.9016	487.64	62.7598	21.6008	24.4973
ERR9791727	SAMEA14479103	PRJEB27135	United Kingdom	Europe	75	27.0754	6.31491	585.975	78.2165	21.6424	27.0189
ERR9791760	SAMEA14479136	PRJEB27135	United Kingdom	Europe	78	32.3471	5.6394	700.895	99.0127	21.6679	37.0713
ERR9791633	SAMEA14479009	PRJEB27135	Ireland	Europe	11	26.7579	4.94701	580.585	69.0812	21.6977	30.0707
ERR9791721	SAMEA14479097	PRJEB27135	United Kingdom	Europe	5	24.8413	3.75947	540.294	68.0539	21.7499	27.4088
ERR9791705	SAMEA14479081	PRJEB27135	United Kingdom	Europe	77	23.8184	6.14094	518.242	61.5289	21.7581	27.6725
ERR9791697	SAMEA14479073	PRJEB27135	United Kingdom	Europe	78	28.0222	4.34179	610.507	78.7211	21.7865	27.383
ERR9791762	SAMEA14479138	PRJEB27135	United Kingdom	Europe	11	41.3638	6.0093	903.093	57.7931	21.8329	43.6242
ERR9791646	SAMEA14479022	PRJEB27135	Ireland	Europe	38	30.4521	7.70392	666.769	73.5405	21.8956	31.5761
ERR9791770	SAMEA14479146	PRJEB27135	Ireland	Europe	9	35.5034	5.46665	777.438	149.973	21.8976	39.9425
ERR9791591	SAMEA14478967	PRJEB27135	United Kingdom	Europe	77	28.4293	5.13626	625.827	96.5781	22.0135	31.4096
ERR9791602	SAMEA14478978	PRJEB27135	United Kingdom	Europe	77	24.1279	3.73161	535.525	65.1849	22.1953	24.9987
ERR9791700	SAMEA14479076	PRJEB27135	United Kingdom	Europe	41	31.4132	4.99373	697.985	154.853	22.2195	27.0308
ERR9791726	SAMEA14479102	PRJEB27135	United Kingdom	Europe	79	25.0476	4.77474	558.561	69.4063	22.3	27.1094
ERR9791613	SAMEA14478989	PRJEB27135	Ireland	Europe	79	24.0556	5.79528	536.811	75.5144	22.3154	25.8458
ERR9791589	SAMEA14478965	PRJEB27135	United Kingdom	Europe	77	25.5559	3.63795	570.503	77.1164	22.3237	29.7423
ERR9791696	SAMEA14479072	PRJEB27135	United Kingdom	Europe	77	20.1396	3.63325	450.852	52.499	22.3864	25.6309
ERR9791592	SAMEA14478968	PRJEB27135	United Kingdom	Europe	77	27.853	5.88492	626.937	85.705	22.5088	31.4235
ERR9791735	SAMEA14479111	PRJEB27135	United Kingdom	Europe	21	30.908	5.49701	695.812	153.422	22.5124	30.9829
ERR9791734	SAMEA14479110	PRJEB27135	United Kingdom	Europe	79	24.8913	5.08098	561.006	68.0998	22.5383	31.3546
ERR9791622	SAMEA14478998	PRJEB27135	Ireland	Europe	79	27.4317	3.97218	618.789	81.3915	22.5574	30.0417
ERR9791717	SAMEA14479093	PRJEB27135	United Kingdom	Europe	2	28.9969	5.04167	657.185	69.76	22.664	30.3898
ERR9791695	SAMEA14479071	PRJEB27135	United Kingdom	Europe	77	22.2279	4.43988	507.058	60.7402	22.8118	25.1474
ERR9791650	SAMEA14479026	PRJEB27135	Ireland	Europe	38	31.7671	5.72728	725.331	78.8519	22.8328	36.6232
ERR9791698	SAMEA14479074	PRJEB27135	United Kingdom	Europe	77	24.0142	3.01364	548.744	67.3669	22.8508	25.6488
ERR9791701	SAMEA14479077	PRJEB27135	United Kingdom	Europe	79	25.105	4.32146	573.733	70.1238	22.8533	27.3995
ERR9791702	SAMEA14479078	PRJEB27135	United Kingdom	Europe	76	24.6924	3.7679	565.995	67.873	22.9218	28.5229
ERR9791634	SAMEA14479010	PRJEB27135	Ireland	Europe	11	25.6658	5.04652	591.322	66.612	23.0393	31.1101
ERR9791779	SAMEA14479155	PRJEB27135	United Kingdom	Europe	2	41.2409	6.85881	960.86	61.2545	23.2987	44.9105
ERR9791690	SAMEA14479066	PRJEB27135	United Kingdom	Europe	77	20.6831	4.00976	484.521	63.9446	23.4259	23.6466
ERR9791632	SAMEA14479008	PRJEB27135	Ireland	Europe	8	25.6523	3.93592	607.889	134.185	23.6973	30.4284
ERR9791616	SAMEA14478992	PRJEB27135	Ireland	Europe	79	28.5114	7.95905	679.118	96.6152	23.8192	30.4824
ERR9791620	SAMEA14478996	PRJEB27135	Ireland	Europe	79	28.4497	5.46631	693.063	86.5199	24.361	31.9104
ERR9791692	SAMEA14479068	PRJEB27135	United Kingdom	Europe	78	22.7795	3.67047	555.57	73.0051	24.3891	24.0607
ERR9791718	SAMEA14479094	PRJEB27135	United Kingdom	Europe	2	24.9407	5.33943	616.1	63.2951	24.7026	27.5303
ERR9791777	SAMEA14479153	PRJEB27135	United Kingdom	Europe	2	35.5503	3.93336	881.761	51.0159	24.8032	39.4781
ERR9791691	SAMEA14479067	PRJEB27135	United Kingdom	Europe	79	18.9123	4.07922	470.831	63.0643	24.8955	23.1015
ERR9791694	SAMEA14479070	PRJEB27135	United Kingdom	Europe	78	23.5948	3.88129	589.389	68.144	24.9796	27.6981
ERR9791729	SAMEA14479105	PRJEB27135	United Kingdom	Europe	48	24.5973	3.77892	618.932	138.71	25.1626	27.7118
ERR9791687	SAMEA14479063	PRJEB27135	United Kingdom	Europe	77	20.3731	4.58774	513.382	66.5609	25.1991	22.7718
ERR9791621	SAMEA14478997	PRJEB27135	Ireland	Europe	79	29.1384	5.66051	735.843	95.5239	25.2534	31.4147
ERR9791747	SAMEA14479123	PRJEB27135	United Kingdom	Europe	77	28.4145	5.96254	731.237	87.6199	25.7347	29.3113
ERR9791778	SAMEA14479154	PRJEB27135	United Kingdom	Europe	2	40.0488	7.15065	1036.91	61.2779	25.8912	44.0929
ERR9791774	SAMEA14479150	PRJEB27135	Ireland	Europe	77	39.365	6.22196	1028.69	86.4415	26.1322	39.8373
ERR9791713	SAMEA14479089	PRJEB27135	United Kingdom	Europe	11	24.8802	4.23015	653.074	71.0811	26.2488	29.6207
ERR9791699	SAMEA14479075	PRJEB27135	United Kingdom	Europe	77	22.1414	4.40464	584.725	66.7158	26.4086	25.7709
ERR9791723	SAMEA14479099	PRJEB27135	United Kingdom	Europe	5	23.1266	3.83732	614.129	70.785	26.5551	27.3967
ERR9791738	SAMEA14479114	PRJEB27135	United Kingdom	Europe	79	24.5763	4.04588	661.158	82.4371	26.9023	30.4729
ERR9791682	SAMEA14479058	PRJEB27135	United Kingdom	Europe	77	24.9351	4.13121	675.691	78.3109	27.0979	27.6645
ERR9791666	SAMEA14479042	PRJEB27135	United Kingdom	Europe	5	23.2477	4.21749	642.701	75.4669	27.6458	24.9269
ERR9791739	SAMEA14479115	PRJEB27135	United Kingdom	Europe	4	32.9259	5.12182	911.217	101.435	27.6748	32.4474
ERR9791740	SAMEA14479116	PRJEB27135	United Kingdom	Europe	10	28.446	4.70147	788.937	96.9399	27.7346	31.1613
ERR9791712	SAMEA14479088	PRJEB27135	United Kingdom	Europe	11	25.4577	4.28597	707.913	77.1307	27.8074	31.4337
ERR9791731	SAMEA14479107	PRJEB27135	United Kingdom	Europe	79	24.5256	3.74592	683.133	90.2841	27.8538	27.1168
ERR9791719	SAMEA14479095	PRJEB27135	United Kingdom	Europe	2	25.3132	4.17289	707.514	73.2195	27.9505	27.2929
ERR9791688	SAMEA14479064	PRJEB27135	United Kingdom	Europe	76	21.7702	3.75473	608.887	78.6702	27.9688	24.0366
ERR9791781	SAMEA14479157	PRJEB27135	United Kingdom	Europe	77	36.9549	5.20897	1033.91	61.9783	27.9777	43.7528
ERR9791749	SAMEA14479125	PRJEB27135	United Kingdom	Europe	79	24.7227	4.36007	692.383	83.5489	28.006	28.7955
ERR9791707	SAMEA14479083	PRJEB27135	United Kingdom	Europe	77	24.6745	5.68853	703.203	82.9614	28.4992	27.0582
ERR9791728	SAMEA14479104	PRJEB27135	United Kingdom	Europe	79	26.5015	4.3315	769.756	105.052	29.0457	27.5084
ERR9791748	SAMEA14479124	PRJEB27135	United Kingdom	Europe	11	27.0346	4.65059	796.292	108.736	29.4546	30.3411
ERR9791667	SAMEA14479043	PRJEB27135	United Kingdom	Europe	11	21.323	5.09623	630.465	70.8844	29.5673	24.636
ERR9791675	SAMEA14479051	PRJEB27135	United Kingdom	Europe	77	25.8326	6.47414	772.285	87.5958	29.8957	28.2005
ERR9791669	SAMEA14479045	PRJEB27135	United Kingdom	Europe	11	23.0025	3.5309	688.441	79.7984	29.929	25.6688
ERR9791681	SAMEA14479057	PRJEB27135	United Kingdom	Europe	77	24.2724	3.41965	726.46	84.4164	29.9295	27.0136
ERR9791676	SAMEA14479052	PRJEB27135	United Kingdom	Europe	77	22.3286	3.4508	672.244	78.0706	30.1068	26.693
ERR9791588	SAMEA14478964	PRJEB27135	United Kingdom	Europe	4	25.8721	3.03121	780.178	102.522	30.1551	27.6222
ERR9791782	SAMEA14479158	PRJEB27135	United Kingdom	Europe	2	32.1655	6.2603	970.297	53.9114	30.1657	41.3398
ERR9791671	SAMEA14479047	PRJEB27135	United Kingdom	Europe	77	25.8536	4.39929	797.129	89.3332	30.8324	28.878
ERR9791753	SAMEA14479129	PRJEB27135	United Kingdom	Europe	78	23.5917	4.48932	727.849	89.2115	30.8519	29.7731
ERR9791668	SAMEA14479044	PRJEB27135	United Kingdom	Europe	11	18.4632	3.12518	569.881	67.0495	30.8657	23.9521
ERR9791673	SAMEA14479049	PRJEB27135	United Kingdom	Europe	77	22.0933	4.38399	682.462	75.4758	30.8901	27.0538
ERR9791706	SAMEA14479082	PRJEB27135	United Kingdom	Europe	10	25.3712	5.29815	784.628	90.9083	30.9259	27.4189
ERR9791680	SAMEA14479056	PRJEB27135	United Kingdom	Europe	75	25.4379	4.44389	789.07	94.1222	31.0194	27.131
ERR9791674	SAMEA14479050	PRJEB27135	United Kingdom	Europe	77	24.9456	5.33832	778.222	86.8584	31.1967	28.4868
ERR9791752	SAMEA14479128	PRJEB27135	United Kingdom	Europe	49	24.4064	4.13019	764.484	169.973	31.323	28.4241
ERR9791745	SAMEA14479121	PRJEB27135	United Kingdom	Europe	28	25.1396	4.49958	790.83	88.9005	31.4576	29.5493
ERR9791750	SAMEA14479126	PRJEB27135	United Kingdom	Europe	11	24.6745	4.93214	778.497	87.3742	31.5507	30.2055
ERR9791776	SAMEA14479152	PRJEB27135	Ireland	Europe	29	37.6918	6.17289	1191.4	235.089	31.609	41.0313
ERR9791751	SAMEA14479127	PRJEB27135	United Kingdom	Europe	79	26.0624	3.39187	836.242	96.5768	32.0862	28.4223
ERR9791711	SAMEA14479087	PRJEB27135	United Kingdom	Europe	11	24.8413	6.40603	798.134	90.0182	32.1294	30.4352
ERR9791732	SAMEA14479108	PRJEB27135	United Kingdom	Europe	79	20.6424	4.43967	668.971	90.4312	32.4077	27.4345
ERR9791685	SAMEA14479061	PRJEB27135	United Kingdom	Europe	77	21.3805	4.17299	695.968	87.8227	32.5516	24.5509
ERR9791744	SAMEA14479120	PRJEB27135	United Kingdom	Europe	77	29.2576	5.23063	961.358	109.134	32.8584	30.5188
ERR9791710	SAMEA14479086	PRJEB27135	United Kingdom	Europe	28	29.6251	4.36467	980.503	106.347	33.0971	31.8005
ERR9791677	SAMEA14479053	PRJEB27135	United Kingdom	Europe	11	24.8802	4.37509	834.253	91.8588	33.5308	27.9279
ERR9791672	SAMEA14479048	PRJEB27135	United Kingdom	Europe	77	20.8085	3.89817	704.75	81.4723	33.8683	25.697
ERR9791743	SAMEA14479119	PRJEB27135	United Kingdom	Europe	75	25.2415	4.46014	897.121	101.694	35.5415	28.4613
ERR9791683	SAMEA14479059	PRJEB27135	United Kingdom	Europe	11	23.0581	5.28031	833.754	85.2628	36.1589	27.2932
ERR9791741	SAMEA14479117	PRJEB27135	United Kingdom	Europe	76	24.5046	4.63692	890.227	104.067	36.3289	31.9448
ERR9791653	SAMEA14479029	PRJEB27135	Ireland	Europe	77	26.7029	3.36032	973.261	115.684	36.4478	28.6759
ERR9791664	SAMEA14479040	PRJEB27135	United Kingdom	Europe	11	18.9889	3.72409	701.336	77.9547	36.934	24.7335
ERR9791720	SAMEA14479096	PRJEB27135	United Kingdom	Europe	2	22.5862	3.94467	850.108	86.871	37.6384	26.9615
ERR9791670	SAMEA14479046	PRJEB27135	United Kingdom	Europe	5	22.1816	5.90482	836.409	96.8619	37.7074	28.1935
ERR9791737	SAMEA14479113	PRJEB27135	United Kingdom	Europe	77	25.6726	3.96543	1029.79	116.573	40.1124	30.5735
ERR9791722	SAMEA14479098	PRJEB27135	United Kingdom	Europe	5	17.5849	5.93574	707.509	82.5085	40.2338	27.4279
ERR9791716	SAMEA14479092	PRJEB27135	United Kingdom	Europe	28	28.7678	4.1563	1178.65	135.894	40.9711	30.9996
ERR9791678	SAMEA14479054	PRJEB27135	United Kingdom	Europe	5	19.9592	4.07268	821.626	84.5014	41.1652	27.1847
ERR9791714	SAMEA14479090	PRJEB27135	United Kingdom	Europe	28	27.9438	3.8159	1186.97	134.033	42.4772	30.519
ERR9791746	SAMEA14479122	PRJEB27135	United Kingdom	Europe	11	27.3867	4.56568	1165.01	124.178	42.5394	30.6873
ERR9791709	SAMEA14479085	PRJEB27135	United Kingdom	Europe	28	23.1032	4.66689	1027.57	112.35	44.4775	31.2975
ERR9791665	SAMEA14479041	PRJEB27135	United Kingdom	Europe	77	19.341	4.56946	867.187	101.877	44.8368	26.8826
ERR9791715	SAMEA14479091	PRJEB27135	United Kingdom	Europe	28	26.3261	4.25397	1184.29	129.448	44.9853	30.2461
ERR9791708	SAMEA14479084	PRJEB27135	United Kingdom	Europe	28	25.5528	4.01652	1155.51	141.52	45.2204	30.3404
ERR9791725	SAMEA14479101	PRJEB27135	United Kingdom	Europe	11	23.8011	6.15157	1115.84	132.401	46.8817	28.1806
ERR9791684	SAMEA14479060	PRJEB27135	United Kingdom	Europe	5	20.4657	4.61087	1005.19	115.921	49.1156	28.2444
ERR9791724	SAMEA14479100	PRJEB27135	United Kingdom	Europe	11	23.4497	4.04339	1348.93	158.698	57.5246	28.5366
ERR9791704	SAMEA14479080	PRJEB27135	United Kingdom	Europe	11	21.9395	4.68726	1396.75	151.183	63.6639	28.4095
ERR2864484	SAMEA5057481	PRJEB28819	Netherlands	Europe	79	137.209	29.4805	696.567	488.042	5.0767	139.621	https://doi.org/10.3389/fmicb.2019.01970 doi: 10.1128/EC.00141-07 doi: 10.1371/journal.pone.0004224
ERR2864485	SAMEA5057488	PRJEB28819	Netherlands	Europe	77	97.0346	16.7989	617.213	446.137	6.36075	94.1474
ERR2864483	SAMEA5057480	PRJEB28819	Netherlands	Europe	5	84.2359	16.96	593.518	358.547	7.0459	86.1203
ERR2863830	SAMEA5055963	PRJEB28819	USA	North America	4	79.491	9.94206	697.884	414.562	8.7794	82.1602
ERR3415715	SAMEA5756197	PRJEB33346	Germany	Europe	50	69.7641	12.377	2536.37	790.896	36.3564	73.1124	SRA
ERR769499	SAMEA3267227	PRJEB8623	United Kingdom	Europe	4	168.632	18.0476	3227.54	368.159	19.1396	190.012	doi: 10.1128/mBio.00536-15
ERR769506	SAMEA3267228	PRJEB8623	Netherlands	Europe	11	104.644	11.5111	2069.64	224.064	19.7779	116.773
ERR769508	SAMEA3267230	PRJEB8623	Netherlands	Europe	11	131.987	16.4701	2980.51	388.753	22.5818	149.614
ERR769507	SAMEA3267229	PRJEB8623	Netherlands	Europe	4	132.634	16.7052	3010.02	325.17	22.6941	151.505
ERR769510	SAMEA3267232	PRJEB8623	Netherlands	Europe	77	140.873	17.9914	3210.48	339.107	22.7898	148.634
ERR769517	SAMEA3267239	PRJEB8623	India	Asia	1	114.211	13.6217	2632.46	334.891	23.0491	125.442
ERR769509	SAMEA3267231	PRJEB8623	Netherlands	Europe	11	157.458	21.2415	3792.05	516.308	24.083	170.614
ERR769514	SAMEA3267236	PRJEB8623	India	Asia	1	140.079	19.1372	3376.22	391.342	24.1022	148.598
ERR769512	SAMEA3267234	PRJEB8623	Netherlands	Europe	5	144.873	15.0109	3501.91	391.446	24.1722	162.52
ERR769500	SAMEA3267220	PRJEB8623	United Kingdom	Europe	10	153.031	20.2062	3769.92	419.4	24.6351	172.122
ERR769501	SAMEA3267221	PRJEB8623	United Kingdom	Europe	11	138.974	16.1384	3438.47	437.097	24.7418	159.143
ERR769516	SAMEA3267238	PRJEB8623	India	Asia	1	111.309	18.0048	2821.53	336.787	25.3487	127.201
ERR769513	SAMEA3267235	PRJEB8623	Netherlands	Europe	11	144.435	16.2857	3705.96	418.192	25.6582	169.99
ERR769505	SAMEA3267225	PRJEB8623	United Kingdom	Europe	11	147.82	21.1077	3806.93	429.667	25.7539	167.019
ERR769503	SAMEA3267223	PRJEB8623	United Kingdom	Europe	4	129.208	17.0502	3356.2	617.225	25.9753	142.983
ERR769511	SAMEA3267233	PRJEB8623	Netherlands	Europe	1	139.177	15.2574	3842.94	451.613	27.6119	155.148
ERR769519	SAMEA3267241	PRJEB8623	India	Asia	1	126.999	18.7074	3553.82	485.096	27.983	139.355
ERR769521	SAMEA3267243	PRJEB8623	India	Asia	1	134.002	13.4769	3868.37	447.783	28.8679	152.78
ERR769502	SAMEA3267222	PRJEB8623	United Kingdom	Europe	28	126.871	16.2943	3679.12	433.389	28.999	145.141
ERR769518	SAMEA3267240	PRJEB8623	India	Asia	1	137.385	12.6982	4185.76	502.423	30.4673	164.093
ERR769498	SAMEA3267226	PRJEB8623	United Kingdom	Europe	38	135.417	14.3545	4143.46	460.303	30.5978	157.121
ERR769504	SAMEA3267224	PRJEB8623	United Kingdom	Europe	28	130.178	13.6899	4106.34	503.228	31.5441	156.544
ERR769520	SAMEA3267242	PRJEB8623	India	Asia	1	96.6924	10.3436	3111.48	363.657	32.1791	111.317
ERR769515	SAMEA3267237	PRJEB8623	India	Asia	1	125.192	25.0178	5932.43	822.334	47.3866	143.612
SRR068952	SAMN00115746	PRJNA131	United Kingdom	Europe	38	35.8122	9.01499	166.395	42.0578	4.64633	41.3005	doi: 10.1038/nature04332
SRR068950	SAMN00115744	PRJNA18733	France	Europe	45	148.427	27.0706	3881.23	1833.06	26.149	148.884	https://doi.org/10.1371/journal.pgen.1000046
SRR159251	SAMN00254055	PRJNA206736	United Kingdom	Europe	4	40.5516	6.32897	179.924	25.269	4.43693	48.8455	SRA
SRR159254	SAMN00254058	PRJNA206736	United Kingdom	Europe	79	29.105	4.21239	152.187	46.1444	5.22891	32.9526
SRR159252	SAMN00254056	PRJNA206736	United Kingdom	Europe	11	27.4225	8.08801	182.654	19.6127	6.66073	35.6394
SRR159253	SAMN00254057	PRJNA206736	United Kingdom	Europe	75	20.2977	4.74156	172.347	29.4399	8.49095	24.75
SRR1187382	SAMN02640230	PRJNA237785	USA	North America	77	0.0426189	0.202059	25.5424	12.6282	599.32	0.207779	https://doi.org/10.1371/journal.ppat.1004834 10.1371/journal.pone.0109061
SRR1523528	SAMN02929927	PRJNA255985	Unknown	Unknown	38	0.154416	0.414058	11.6651	4.21699	75.543	22.1505
SRR1614172	SAMN02999441	PRJNA258513	USA	North America	38	487.933	238.61	15.3689	49.2185	0.0314979	337.537	SRA
SRR1614168	SAMN02999444	PRJNA258513	USA	North America	38	296.558	152.526	9.72561	31.438	0.032795	108.182
SRR1614169	SAMN02999446	PRJNA258513	USA	North America	38	236.73	122.906	10.1298	33.1959	0.0427906	140.375
SRR1614167	SAMN02999443	PRJNA258513	USA	North America	38	391.511	195.207	18.7251	53.2645	0.0478277	138.774
SRR1614170	SAMN02999445	PRJNA258513	USA	North America	38	249.052	138.157	16.4385	53.0865	0.0660042	139.187
SRR2954803	SAMN04219459	PRJNA298653	Peru	South America	16	79.5874	9.12455	1945.74	916.106	24.4478	86.2056	https://doi.org/10.1016/j.jbiotec.2017.04.010
SRR4002444	SAMN05511649	PRJNA319359	ISS	Space	28	28.635	5.30487	756.169	72.4599	26.4072	29.6712	doi: 10.1128/genomeA.00553-16
SRR4002443	SAMN05511648	PRJNA319359	ISS	Space	79	78.8351	9.94127	2881.52	173.221	36.5512	87.9223
SRR4142436	SAMN05446538	PRJNA334306	Unknown	Unknown	3	98.664	10.0465	1978.86	351.084	20.0565	113.201	Award DOI: 10.46936/10.25585/60001008
SRR4142462	SAMN05446539	PRJNA334307	Unknown	Unknown	3	104.114	9.75091	1526.34	264.021	14.6602	117.034
SRR4142426	SAMN05442760	PRJNA334308	Unknown	Unknown	3	113.75	13.1994	1915.28	332.326	16.8376	117.088
SRR4142434	SAMN05442935	PRJNA334309	Unknown	Unknown	3	106.155	12.0778	1340.38	486.55	12.6266	120.181
SRR4142839	SAMN05446296	PRJNA334310	Unknown	Unknown	3	97.769	10.2028	2182.95	291.684	22.3276	113.531
SRR4142834	SAMN05446297	PRJNA334311	Unknown	Unknown	3	107.183	11.9123	1538.19	211.688	14.3511	113.636
SRR4142833	SAMN05442934	PRJNA334312	Unknown	Unknown	3	107.33	10.5212	1415.62	240.45	13.1893	115.642
SRR4142844	SAMN05446298	PRJNA334313	Unknown	Unknown	3	100.783	8.91066	1649.05	245.963	16.3624	114.42
SRR4151122	SAMN05446299	PRJNA334314	Unknown	Unknown	3	99.0253	10.3425	809.239	107.779	8.17204	111.415
SRR4142832	SAMN05446300	PRJNA334315	Unknown	Unknown	3	107.723	10.3196	1152.42	204.74	10.698	115.857
SRR4235917	SAMN05444589	PRJNA335155	Unknown	Unknown	3	58.7264	7.88953	296.911	90.3062	5.05584	54.5131
SRR4235915	SAMN05444121	PRJNA335156	Unknown	Unknown	3	52.2823	8.37465	219.723	106.543	4.20264	52.4499
SRR4235916	SAMN05444590	PRJNA335157	Unknown	Unknown	3	55.4151	7.72284	172.665	63.3253	3.11585	54.8444
SRR4235922	SAMN05444591	PRJNA335158	Unknown	Unknown	3	63.1785	8.23757	340.462	108.537	5.38888	62.1388
SRR4235920	SAMN05444120	PRJNA335159	Unknown	Unknown	3	71.5281	8.32964	708.335	319.633	9.90288	72.6325
SRR4235921	SAMN05444592	PRJNA335160	Unknown	Unknown	3	69.475	5.98328	120.797	58.6424	1.73871	66.442
SRR4235924	SAMN05444097	PRJNA335161	Unknown	Unknown	3	61.0439	7.0267	333.805	185.457	5.46829	63.4216
SRR4235923	SAMN05444593	PRJNA335162	Unknown	Unknown	3	63.7227	7.15822	596.823	262.302	9.36595	63.3857
SRR4235927	SAMN05444488	PRJNA335163	Unknown	Unknown	3	75.6936	9.85513	807.813	354.626	10.6721	77.9363
SRR4235926	SAMN05444096	PRJNA335164	Unknown	Unknown	3	68.2403	9.63395	741.271	249.198	10.8627	66.1872
SRR4235925	SAMN05444489	PRJNA335165	Unknown	Unknown	3	67.2539	9.73641	282.349	121.337	4.19826	64.8098
SRR4235929	SAMN05444490	PRJNA335166	Unknown	Unknown	3	86.6609	9.70144	560.103	267.223	6.46315	90.6609
SRR4235930	SAMN05444095	PRJNA335167	Unknown	Unknown	3	64.4762	10.1287	507.678	241.362	7.87389	60.7637
SRR4235931	SAMN05444491	PRJNA335168	Unknown	Unknown	3	88.231	6.94716	424.265	144.18	4.80857	90.74
SRR4235932	SAMN05444094	PRJNA335169	Unknown	Unknown	3	57.6868	6.64992	382.482	95.7158	6.63031	61.2214
SRR4235933	SAMN05444492	PRJNA335170	Unknown	Unknown	3	74.1316	9.90938	839.139	275.223	11.3196	71.7689
SRR9067511	SAMN11579506	PRJNA388547	Singapore	Asia	68	51.5794	8.92555	1512.64	175.854	29.3264	48.4139	SRA
SRR5676590	SAMN07222748	PRJNA390160	Portugal	Europe	16	138.33	12.8414	5440.5	513.894	39.3299	153.187	https://doi.org/10.1371/journal.pbio.2003583
SRR5676592	SAMN07222750	PRJNA390160	Portugal	Europe	21	208.044	23.2347	12865.7	2727.2	61.8411	251.908
SRR5676588	SAMN07222746	PRJNA390160	Portugal	Europe	68	160.511	16.7082	12509.8	1293.15	77.9369	202.217
SRR5676587	SAMN07222736	PRJNA390160	Portugal	Europe	66	179.412	21.4417	14280.2	1314.24	79.5946	213.033
SRR5676593	SAMN07222749	PRJNA390160	Portugal	Europe	79	151.797	19.6152	12218.6	1318.1	80.4926	199.558
SRR5676586	SAMN07222744	PRJNA390160	Portugal	Europe	66	157.142	17.2425	13046.6	1344.25	83.0241	200.283
SRR5676591	SAMN07222747	PRJNA390160	Portugal	Europe	68	145.775	18.2901	12505.7	1224.26	85.7879	178.464
SRR5676589	SAMN07222745	PRJNA390160	Portugal	Europe	68	156.918	16.902	15846.4	1629.32	100.985	203.225
SRR17970486	SAMN25825927	PRJNA401150	Netherlands	Europe	11	51.4867	6.99843	906.62	524.835	17.6088	49.1457	https://doi.org/10.1098/rspb.2017.0635
SRR17970484	SAMN25825929	PRJNA401150	Netherlands	Europe	11	48.0377	7.34741	886.238	494.407	18.4488	49.2693
SRR17970479	SAMN25825934	PRJNA401150	Netherlands	Europe	11	46.3076	10.9674	860.11	424.744	18.5738	49.4541
SRR17967721	SAMN07595032	PRJNA401150	Netherlands	Europe	11	52.2594	8.32272	973.723	499.101	18.6325	49.5689
SRR17970485	SAMN25825928	PRJNA401150	Netherlands	Europe	11	48.887	6.89504	961.991	581.212	19.6779	49.1237
SRR17970483	SAMN25825930	PRJNA401150	Netherlands	Europe	11	47.6214	9.22835	968.037	532.281	20.3278	49.3108
SRR17970482	SAMN25825931	PRJNA401150	Netherlands	Europe	11	49.7332	6.66609	1082.87	636.323	21.7735	49.2951
SRR17970480	SAMN25825933	PRJNA401150	Netherlands	Europe	11	52.4836	9.54387	1356.8	643.577	25.8519	49.5766
SRR17970481	SAMN25825932	PRJNA401150	Netherlands	Europe	11	44.0284	6.14125	1159.23	625.932	26.3292	49.2636
SRR6277228	SAMN08005207	PRJNA417720	United Kingdom	Europe	38	10.3786	3.19754	590.749	68.5945	56.9197	14.6356	https://doi.org/10.1038/s41564-019-0558-7
SRR6277229	SAMN08005206	PRJNA417720	USA	North America	38	4.8042	2.32508	476.554	67.3167	99.1952	6.34459
SRR6434918	SAMN08235363	PRJNA427336	USA	North America	79	15.244	4.5155	442.294	55.8938	29.0143	17.3184	doi: 10.1111/tid.12935
SRR6434917	SAMN08235362	PRJNA427336	USA	North America	78	134.533	15.6953	4638.71	296.31	34.4801	149.997
SRR334209	SAMN00714282	PRJNA46347	USA	North America	79	85.0673	10.2244	199.559	19.7456	2.34589	114.474	SRA
SRR332274	SAMN00710433	PRJNA46347	USA	North America	79	4.81408	2.00232	30.3241	21.9624	6.29903	6.74565
SRR332251	SAMN00710403	PRJNA46347	USA	North America	79	1.25263	0.753925	20.5016	9.16755	16.3669	2.98539
SRR332407	SAMN00710541	PRJNA46347	USA	North America	79	2.06856	1.58473	33.912	16.1161	16.394	2.98429
SRR7418930	SAMN09470296	PRJNA477519	Spain	Europe	16	45.6677	8.7862	124.829	151.677	2.73342	41.8002	doi: 10.3390/genes9070363
SRR7418929	SAMN09470291	PRJNA477519	Spain	Europe	16	62.7801	7.66293	245.17	235.483	3.90522	57.8945
SRR7418942	SAMN09470300	PRJNA477519	Spain	Europe	79	81.3107	13.4539	473.934	370.727	5.82868	75.8746
SRR7418923	SAMN09470293	PRJNA477519	Spain	Europe	16	62.824	7.3814	368.111	329.023	5.8594	61.051
SRR7418945	SAMN09470303	PRJNA477519	Spain	Europe	78	59.3935	8.06963	374.757	341.104	6.30974	56.5028
SRR7418922	SAMN09470292	PRJNA477519	Spain	Europe	16	57.8962	9.21688	386.82	301.29	6.68126	56.1868
SRR7418947	SAMN09470305	PRJNA477519	Spain	Europe	11	78.9506	18.2552	544.717	346.378	6.89947	92.6491
SRR7418925	SAMN09470295	PRJNA477519	Spain	Europe	16	84.0679	11.2463	605.669	377.56	7.20451	84.2908
SRR7418941	SAMN09470299	PRJNA477519	Spain	Europe	36	59.47	8.07648	481.423	471.344	8.09521	62.6082
SRR7418934	SAMN09470315	PRJNA477519	Spain	Europe	46	52.328	9.16801	473.954	243.791	9.05738	55.2276
SRR7418943	SAMN09470301	PRJNA477519	Spain	Europe	23	80.0729	10.4016	730.387	541.829	9.12153	74.4184
SRR7418937	SAMN09470308	PRJNA477519	Spain	Europe	57	50.5127	11.976	472.836	415.406	9.36074	54.7481
SRR7418931	SAMN09470297	PRJNA477519	Spain	Europe	38	55.1069	9.57336	536.097	472.976	9.72832	58.3675
SRR7418949	SAMN09470307	PRJNA477519	Spain	Europe	67	74.1408	18.2591	745.836	378.714	10.0597	87.1422
SRR7418928	SAMN09470290	PRJNA477519	Spain	Europe	16	60.6109	6.19895	710.292	529.736	11.7189	55.1159
SRR7418940	SAMN09470298	PRJNA477519	Spain	Europe	38	47.538	4.40701	569.089	281.28	11.9713	47.9427
SRR7418927	SAMN09470289	PRJNA477519	Spain	Europe	16	64.6479	12.7461	788.078	638.348	12.1903	68.1147
SRR7418944	SAMN09470302	PRJNA477519	Spain	Europe	11	78.1569	13.5971	960.891	649.395	12.2944	78.4896
SRR7418939	SAMN09470310	PRJNA477519	Spain	Europe	21	47.7227	11.0914	587.729	317.364	12.3155	54.4052
SRR7418948	SAMN09470306	PRJNA477519	Spain	Europe	16	68.3471	13.433	889.401	573.289	13.013	69.7967
SRR7418935	SAMN09470314	PRJNA477519	Spain	Europe	11	61.2705	9.27007	838.266	433.276	13.6814	70.3245
SRR7418924	SAMN09470294	PRJNA477519	Spain	Europe	16	59.3323	8.21246	813.604	432.685	13.7127	60.9108
SRR7418946	SAMN09470304	PRJNA477519	Spain	Europe	16	71.9166	13.635	1171.34	547.583	16.2875	83.5252
SRR7418926	SAMN09470288	PRJNA477519	Spain	Europe	16	37.239	5.55	628.29	263.674	16.8718	38.9527
SRR7418936	SAMN09470309	PRJNA477519	Spain	Europe	37	80.084	14.9081	1388.41	729.845	17.3369	100.447
SRR7418933	SAMN09470312	PRJNA477519	Spain	Europe	16	88.3755	19.5142	1719.64	772.318	19.4583	98.9896
SRR7418932	SAMN09470313	PRJNA477519	Spain	Europe	47	76.2804	15.0659	1773.63	836.975	23.2514	91.0221
SRR7418938	SAMN09470311	PRJNA477519	Spain	Europe	77	123.942	23.1486	3118.88	1442.77	25.164	142.403
SRR068951	SAMN00115745	PRJNA52783	Unknown	Unknown	11	50.2236	10.2397	186.85	23.5267	3.72036	54.8471	doi: 10.1186/1471-2164-13-698
SRR189664	SAMN00260273	PRJNA52783	Unknown	Unknown	11	3.76282	1.81889	27.1043	19.4038	7.2032	5.02193
SRR189663	SAMN00260272	PRJNA52783	Unknown	Unknown	11	2.10253	1.23779	41.1568	18.7297	19.5749	2.40116
SRR189665	SAMN00260274	PRJNA52783	Unknown	Unknown	13	0.828289	0.804908	18.8872	9.17299	22.8027	3.52757
SRR8759704	SAMN11180829	PRJNA528395	Netherlands	Europe	76	110.34	14.994	790.349	505.334	7.16287	119.966	doi: 10.1016/j.dib.2019.104021
SRR8759706	SAMN11180828	PRJNA528395	Netherlands	Europe	76	78.5899	13.2985	565.219	329.011	7.192	88.2536
SRR8759708	SAMN11180830	PRJNA528395	Netherlands	Europe	76	87.252	14.4557	671.971	388.388	7.7015	94.4426
SRR8759699	SAMN11180821	PRJNA528395	Netherlands	Europe	76	119.967	18.1601	963.077	609.475	8.02783	131.333
SRR8759700	SAMN11180820	PRJNA528395	Netherlands	Europe	76	103.729	17.6542	854.843	517.737	8.24113	110.823
SRR8759702	SAMN11180825	PRJNA528395	Netherlands	Europe	76	115.219	14.7481	1207.66	926.02	10.4814	128.176
SRR8759703	SAMN11180824	PRJNA528395	Netherlands	Europe	76	96.6442	16.1686	1069.21	582.413	11.0634	101.168
SRR8759709	SAMN11180832	PRJNA528395	Netherlands	Europe	76	105.676	15.2572	1169.23	638.684	11.0643	113.029
SRR8759707	SAMN11180831	PRJNA528395	Netherlands	Europe	76	87.1841	15.8382	1029.44	469.203	11.8076	96.1426
SRR8759698	SAMN11180822	PRJNA528395	Netherlands	Europe	76	224.704	39.5365	3700.13	1550.39	16.4667	297.883
SRR8759697	SAMN11180823	PRJNA528395	Netherlands	Europe	76	194.37	36.9828	3353.01	1394.25	17.2506	241.504
SRR8759701	SAMN11180827	PRJNA528395	Netherlands	Europe	76	24.7752	7.45776	469.574	228.148	18.9534	24.7423
SRR8759705	SAMN11180826	PRJNA528395	Netherlands	Europe	76	1.98518	1.67945	56.6108	24.2569	28.5168	2.02947
SRR9265317	SAMN12011972	PRJNA548244	India	Asia	79	19.4435	3.67395	39.0681	55.48	2.00932	18.0399	https://doi.org/10.1016/j.fgb.2019.103265
SRR9265315	SAMN12011970	PRJNA548244	India	Asia	79	17.1655	7.70483	35.9327	47.3476	2.09331	14.6923
SRR9265316	SAMN12011971	PRJNA548244	India	Asia	79	18.6924	5.78193	57.1287	78.9383	3.05625	17.9943
SRR9265318	SAMN12011973	PRJNA548244	India	Asia	52	21.8128	6.86657	83.877	97.8376	3.8453	19.3981
SRR10997306	SAMN13512630	PRJNA575185	USA	North America	78	12.3632	3.22751	36.9772	24.9741	2.99091	25.1776	doi: 10.1038/s41598-021-94911-0
SRR10997313	SAMN13512630	PRJNA575185	USA	North America	78	11.3941	3.07212	39.1393	23.1786	3.43506	22.5318
SRR10997311	SAMN13512629	PRJNA575185	USA	North America	78	20.609	8.34135	73.4508	36.1625	3.56401	32.5718
SRR10997260	SAMN13512629	PRJNA575185	USA	North America	78	22.3922	9.1246	83.7907	36.5481	3.74196	36.7174
SRR10997245	SAMN13512630	PRJNA575185	USA	North America	78	14.7702	5.19428	55.8155	28.665	3.77892	26.8574
SRR10997283	SAMN13512629	PRJNA575185	USA	North America	78	16.2458	4.2409	61.8311	33.1584	3.80597	33.878
SRR10997302	SAMN13512630	PRJNA575185	USA	North America	78	15.9506	3.9122	61.2014	34.0996	3.83693	36.7289
SRR10997287	SAMN13512629	PRJNA575185	USA	North America	78	20.1464	3.86342	77.8048	36.1925	3.86198	39.4279
SRR10997276	SAMN13512629	PRJNA575185	USA	North America	78	19.5831	5.85462	77.6331	38.0315	3.96429	35.4096
SRR10997241	SAMN13512632	PRJNA575185	USA	North America	78	30.1106	9.0803	120.025	48.6855	3.98613	67.0831
SRR10997309	SAMN13512631	PRJNA575185	USA	North America	78	21.9932	5.85301	89.2453	42.8008	4.05786	41.7475
SRR10997250	SAMN13512631	PRJNA575185	USA	North America	78	22.5077	7.74735	91.739	41.9224	4.07589	30.9397
SRR10997258	SAMN13512631	PRJNA575185	USA	North America	78	28.0093	7.17057	115.008	45.6693	4.10608	58.0379
SRR10997322	SAMN13512629	PRJNA575185	USA	North America	78	16.2304	5.31057	67.8737	33.9933	4.18189	27.5895
SRR10997284	SAMN13512629	PRJNA575185	USA	North America	78	16.013	4.57736	68.7985	33.4528	4.29642	24.486
SRR10997269	SAMN13512631	PRJNA575185	USA	North America	78	24.9253	5.91524	109.751	44.581	4.40322	44.9396
SRR10997252	SAMN13512630	PRJNA575185	USA	North America	78	13.9141	3.22719	63.5788	33.9318	4.56936	25.7842
SRR10997297	SAMN13512631	PRJNA575185	USA	North America	78	26.3292	7.46113	123.406	47.9908	4.68704	40.651
SRR10997274	SAMN13512631	PRJNA575185	USA	North America	78	17.4373	4.28831	81.8269	39.6871	4.69263	29.7049
SRR10997278	SAMN13512630	PRJNA575185	USA	North America	78	13.782	3.35737	64.9743	35.7318	4.71444	29.3769
SRR10997295	SAMN13512631	PRJNA575185	USA	North America	78	30.399	9.90081	144.882	52.3413	4.76601	48.8967
SRR10997243	SAMN13512631	PRJNA575185	USA	North America	78	22.3922	5.14967	108.247	42.5151	4.83414	39.6882
SRR10997327	SAMN13512631	PRJNA575185	USA	North America	78	18.9611	5.04115	92.3192	39.8654	4.86887	30.3421
SRR10997272	SAMN13512632	PRJNA575185	USA	North America	78	5.19765	2.21535	26.2379	17.2801	5.04802	7.86563
SRR10997317	SAMN13512632	PRJNA575185	USA	North America	78	18.0371	5.78828	91.6631	41.2695	5.08193	28.3966
SRR10997281	SAMN13512629	PRJNA575185	USA	North America	78	14.4416	4.03119	77.3462	38.4345	5.35578	25.429
SRR10997273	SAMN13512631	PRJNA575185	USA	North America	78	20.1655	6.11477	108.032	43.2606	5.35727	33.9725
SRR10997285	SAMN13512630	PRJNA575185	USA	North America	78	12.5874	4.84993	68.8652	33.0077	5.47096	19.617
SRR10997263	SAMN13512632	PRJNA575185	USA	North America	78	12.8443	4.22723	81.8704	38.0724	6.37404	21.8044
SRR10997305	SAMN13512630	PRJNA575185	USA	North America	78	9.92156	4.06613	63.596	31.5741	6.40988	17.5358
SRR10997282	SAMN13512631	PRJNA575185	USA	North America	78	14.2106	5.39567	97.4995	42.7108	6.86103	23.938
SRR10997300	SAMN13512629	PRJNA575185	USA	North America	78	406.518	35.407	3725.03	1826.75	9.16325	476.775
SRR10997299	SAMN13512630	PRJNA575185	USA	North America	78	375.111	32.6501	4160.33	1086.53	11.0909	455.792
SRR10997326	SAMN13512631	PRJNA575185	USA	North America	78	1.61643	1.50623	19.7811	13.4485	12.2376	3.24543
SRR10997288	SAMN13512631	PRJNA575185	USA	North America	67	372.665	31.8176	14532	1862.03	38.9949	471.941
SRR10997277	SAMN13512632	PRJNA575185	USA	North America	67	445.989	38.146	19449.8	1806.95	43.6105	541.627
SRR10592629	SAMN13422810	PRJNA592352	Spain	Europe	78	95.5269	9.87873	1094.85	707.525	11.4612	99.253	https://doi.org/10.3389/fgene.2020.00459
SRR10592631	SAMN13422808	PRJNA592352	Spain	Europe	11	47.9876	8.53893	593.499	318.969	12.3677	49.6564
SRR10592633	SAMN13422806	PRJNA592352	Spain	Europe	1	65.5022	13.1408	1108.28	750.036	16.9197	69.0182
SRR10592630	SAMN13422809	PRJNA592352	Spain	Europe	79	88.029	15.4486	1492.72	637.181	16.9571	94.2991
SRR10592632	SAMN13422807	PRJNA592352	Spain	Europe	11	35.7801	4.24102	623.064	268.711	17.4137	37.9709
SRR10714210	SAMN13559193	PRJNA595552	Germany	Europe	38	40.1952	7.08688	35.5674	24.7175	0.884868	36.3588	https://doi.org/10.1128/mbio.02213-20
SRR10714216	SAMN13559187	PRJNA595552	Germany	Europe	75	86.7708	15.8226	109.497	107.95	1.26191	92.9579
SRR10714248	SAMN13559170	PRJNA595552	Germany	Europe	78	56.7177	11.211	81.5142	85.8784	1.43719	53.1113
SRR10714214	SAMN13559189	PRJNA595552	Germany	Europe	75	55.5781	7.46102	90.4882	111.634	1.62813	46.4135
SRR10714213	SAMN13559190	PRJNA595552	Germany	Europe	77	65.4663	10.3809	118.373	107.942	1.80815	80.3954
SRR10714244	SAMN13559174	PRJNA595552	Germany	Europe	10	16.4002	3.30548	32.423	29.1007	1.97699	16.9638
SRR10714250	SAMN13559168	PRJNA595552	Germany	Europe	77	61.1915	15.437	132.228	138.4	2.16088	56.7731
SRR10714247	SAMN13559171	PRJNA595552	Germany	Europe	79	38.0154	5.58453	82.2856	114.796	2.16453	34.2598
SRR10714233	SAMN13559206	PRJNA595552	Germany	Europe	38	16.3743	4.93763	35.5894	18.2784	2.17349	31.6438
SRR10714245	SAMN13559173	PRJNA595552	Germany	Europe	78	35.4219	7.09815	80.5588	68.6216	2.27427	35.877
SRR10714243	SAMN13559175	PRJNA595552	Germany	Europe	79	33.5158	7.22884	77.8004	110.749	2.32131	30.8805
SRR10714246	SAMN13559172	PRJNA595552	Germany	Europe	11	41.971	6.91122	103.296	146.707	2.46112	41.4
SRR10714222	SAMN13559182	PRJNA595552	Germany	Europe	57	79.4762	12.7377	196.506	182.178	2.47252	79.8569
SRR10714212	SAMN13559191	PRJNA595552	Germany	Europe	79	53.1062	9.26094	135.121	101.554	2.54435	62.9806
SRR10714249	SAMN13559169	PRJNA595552	Germany	Europe	5	46.0253	7.38496	122.089	158.295	2.65264	39.8706
SRR10714220	SAMN13559184	PRJNA595552	Germany	Europe	11	94.0241	12.5871	263.311	209.917	2.80047	106.485
SRR10714211	SAMN13559192	PRJNA595552	Germany	Europe	11	12.5349	3.77559	37.1292	26.1291	2.96207	15.7718
SRR10714251	SAMN13559167	PRJNA595552	Germany	Europe	75	39.252	9.5472	119.912	107.242	3.05492	44.1125
SRR10714240	SAMN13559177	PRJNA595552	Germany	Europe	36	35.9444	5.99562	116.623	143.132	3.24454	35.4002
SRR10714208	SAMN13559195	PRJNA595552	Germany	Europe	75	87.9209	14.0898	290.371	103.505	3.30264	158.533
SRR10714219	SAMN13559185	PRJNA595552	Germany	Europe	62	86.4639	9.71913	310.596	270.657	3.59221	93.1233
SRR10714203	SAMN13559199	PRJNA595552	Germany	Europe	79	95.554	15.1902	382.944	152.181	4.00762	122.745
SRR10714201	SAMN13559201	PRJNA595552	Germany	Europe	79	27.425	5.91355	114.845	69.3418	4.18763	28.0877
SRR10714229	SAMN13559209	PRJNA595552	Germany	Europe	75	18.6461	5.12792	81.9138	51.8485	4.39308	32.1839
SRR10714218	SAMN13559186	PRJNA595552	Germany	Europe	16	17.1779	4.41264	76.039	56.8121	4.42656	21.174
SRR10714242	SAMN13559176	PRJNA595552	Germany	Europe	11	43.6615	11.3161	206.869	206.045	4.73802	45.5017
SRR10714239	SAMN13559178	PRJNA595552	Germany	Europe	79	67.0247	8.58561	329.821	235.127	4.92089	74.3868
SRR10714202	SAMN13559200	PRJNA595552	Germany	Europe	75	115.643	17.9206	579.493	178.039	5.01105	179.812
SRR10714223	SAMN13559181	PRJNA595552	Germany	Europe	79	51.9907	10.2627	287.121	189.822	5.52254	55.1083
SRR10714224	SAMN13559180	PRJNA595552	Germany	Europe	14	78.5621	11.4725	438.04	353.319	5.57572	89.1402
SRR10714258	SAMN13559161	PRJNA595552	Germany	Europe	11	28.0037	6.63576	165.632	111.288	5.91465	27.0421
SRR10714257	SAMN13559162	PRJNA595552	Germany	Europe	79	38.1569	5.28321	228.466	159.206	5.98753	31.4827
SRR10714264	SAMN13559147	PRJNA595552	Germany	Europe	75	35.3237	8.73106	213.011	98.5527	6.03027	28.1674
SRR10714221	SAMN13559183	PRJNA595552	Germany	Europe	11	33.0346	6.91249	220.741	145.456	6.68211	29.2132
SRR10714238	SAMN13559179	PRJNA595552	Germany	Europe	11	28.9049	4.83902	202.397	135.991	7.00219	28.2153
SRR10714207	SAMN13559196	PRJNA595552	Germany	Europe	57	58.5874	7.4663	417.784	128.134	7.13095	126.003
SRR10714236	SAMN13559203	PRJNA595552	Germany	Europe	11	18.3613	3.82478	135.616	42.5447	7.38596	20.205
SRR10714260	SAMN13559159	PRJNA595552	Germany	Europe	79	31.5219	6.98948	242.294	117.049	7.68653	27.3558
SRR10714237	SAMN13559202	PRJNA595552	Germany	Europe	77	17.9636	5.08754	141.558	68.7966	7.88029	17.0353
SRR10714228	SAMN13559210	PRJNA595552	Germany	Europe	79	23.6313	5.46044	187.821	87.3448	7.94798	25.7671
SRR10714215	SAMN13559188	PRJNA595552	Germany	Europe	79	62.7764	9.202	500.878	351.851	7.97875	61.6829
SRR10714263	SAMN13559148	PRJNA595552	Germany	Europe	79	113.621	12.0182	927.345	631.75	8.16171	105.082
SRR10714253	SAMN13559166	PRJNA595552	Germany	Europe	79	61.21	7.29193	533.376	373.995	8.71387	60.4428
SRR10714205	SAMN13559197	PRJNA595552	Germany	Europe	77	37.7505	8.24056	337.298	67.3415	8.93493	87.001
SRR10714204	SAMN13559198	PRJNA595552	Germany	Europe	54	70.9568	7.91234	655.773	180.649	9.24187	128.854
SRR10714217	SAMN13559151	PRJNA595552	Germany	Europe	79	58.0581	10.3838	549.125	181.756	9.45821	60.0966
SRR10714256	SAMN13559163	PRJNA595552	Germany	Europe	11	77.1353	7.58151	752.892	404.397	9.76067	74.2219
SRR10714255	SAMN13559164	PRJNA595552	Germany	Europe	79	54.1272	6.90532	539.347	345.495	9.96444	54.9272
SRR10714254	SAMN13559165	PRJNA595552	Germany	Europe	79	36.567	5.08357	449.859	259.62	12.3023	32.9468
SRR10714227	SAMN13559154	PRJNA595552	Germany	Europe	79	61.3193	6.5219	800.162	212.525	13.0491	61.2539
SRR10714259	SAMN13559160	PRJNA595552	Germany	Europe	77	62.5559	12.6518	834.567	511.86	13.3411	59.1355
SRR10714230	SAMN13559208	PRJNA595552	Germany	Europe	79	41.1013	7.50967	558.118	119.107	13.5791	36.9669
SRR10714262	SAMN13559157	PRJNA595552	Germany	Europe	79	45.2884	10.4778	662.71	316.285	14.6331	46.2299
SRR10714206	SAMN13559152	PRJNA595552	Germany	Europe	77	45.0099	7.51783	698.053	334.512	15.5089	46.9497
SRR10714241	SAMN13559150	PRJNA595552	Germany	Europe	79	31.7431	6.96358	505.672	102.677	15.9302	33.9533
SRR10714231	SAMN13559207	PRJNA595552	Germany	Europe	10	8.03768	2.99161	132.665	32.1992	16.5053	23.9159
SRR10714261	SAMN13559158	PRJNA595552	Germany	Europe	4	25.7097	3.45173	440.45	146.277	17.1317	27.0611
SRR10714225	SAMN13559156	PRJNA595552	Germany	Europe	71	34.8653	5.37509	615.562	276.854	17.6554	36.4569
SRR10714252	SAMN13559149	PRJNA595552	Germany	Europe	38	64.2162	9.21996	1187.61	222.91	18.4939	61.7337
SRR10714235	SAMN13559204	PRJNA595552	Germany	Europe	77	45.1705	10.0268	906.707	222.171	20.073	45.5749
SRR10714226	SAMN13559155	PRJNA595552	Germany	Europe	79	40.1186	5.38053	805.902	201.838	20.088	40.7411
SRR10714232	SAMN13559153	PRJNA595552	Germany	Europe	79	24.6881	4.63084	527.096	144.506	21.3502	26.4441
SRR10714234	SAMN13559205	PRJNA595552	Germany	Europe	68	60.092	10.4657	1394.98	215.907	23.214	57.1654
SRR10714209	SAMN13559194	PRJNA595552	Germany	Europe	78	47.454	8.77085	2008.61	331.161	42.3275	54.7962
SRR10815952	SAMN13709540	PRJNA598656	Netherlands	Europe	12	19.7288	3.86739	23.9091	38.4339	1.21189	14.8713	doi: 10.1038/s41522-020-00163-7
SRR10815972	SAMN13709548	PRJNA598656	Netherlands	Europe	79	17.3292	4.42067	317.512	41.6155	18.3224	17.3817
SRR10815945	SAMN13709543	PRJNA598656	Netherlands	Europe	79	21.7881	4.32576	472.597	62.439	21.6905	21.5016
SRR10815970	SAMN13709550	PRJNA598656	Netherlands	Europe	79	13.1834	3.66274	320.964	42.2584	24.346	14.7674
SRR10815975	SAMN13709537	PRJNA598656	Netherlands	Europe	77	23.2261	4.14518	586.321	80.9302	25.2441	20.2099
SRR10815969	SAMN13709551	PRJNA598656	Netherlands	Europe	79	14.8598	5.3265	376.482	49.8568	25.3356	16.7148
SRR10815960	SAMN13709559	PRJNA598656	Netherlands	Europe	77	19.4904	5.50439	501.542	70.724	25.7328	17.9611
SRR10815944	SAMN13709544	PRJNA598656	Netherlands	Europe	75	18.9141	5.05184	498.204	62.2171	26.3403	16.8459
SRR10815968	SAMN13709552	PRJNA598656	Netherlands	Europe	77	20.9531	4.7057	569.836	73.7455	27.1958	17.063
SRR10815973	SAMN13709547	PRJNA598656	Netherlands	Europe	77	18.1087	5.00092	493.335	114.878	27.243	16.535
SRR10815964	SAMN13709556	PRJNA598656	Netherlands	Europe	77	15.9771	3.10947	444.849	64.3822	27.8428	14.601
SRR10815948	SAMN13709570	PRJNA598656	Netherlands	Europe	64	14.5825	3.46372	421.571	68.2138	28.9094	13.6356
SRR10815953	SAMN13709566	PRJNA598656	Netherlands	Europe	79	12.9098	3.96795	395.884	55.4477	30.6653	13.837
SRR10815943	SAMN13709545	PRJNA598656	Netherlands	Europe	11	10.1112	2.82318	313.814	62.139	31.0363	13.3229
SRR10815950	SAMN13709568	PRJNA598656	Netherlands	Europe	16	19.6763	3.75751	620.404	82.6582	31.5304	16.8712
SRR10815947	SAMN13709541	PRJNA598656	Netherlands	Europe	36	17.8684	4.36648	565.771	67.7107	31.6631	17.9193
SRR10815961	SAMN13709558	PRJNA598656	Netherlands	Europe	11	16.1204	3.92573	512.97	58.8831	31.8211	15.1905
SRR10815958	SAMN13709561	PRJNA598656	Netherlands	Europe	16	20.9209	5.17589	667.729	87.8527	31.9168	19.981
SRR10815951	SAMN13709567	PRJNA598656	Netherlands	Europe	66	17.2699	3.46223	553.669	68.3557	32.0597	16.5867
SRR10815959	SAMN13709560	PRJNA598656	Netherlands	Europe	77	11.5806	3.33597	380.33	48.4567	32.842	12.8536
SRR10815974	SAMN13709538	PRJNA598656	Netherlands	Europe	16	19.8728	4.20796	656.352	83.5185	33.0277	17.8206
SRR10815949	SAMN13709569	PRJNA598656	Netherlands	Europe	66	20.7332	3.52956	704.938	88.4386	34.0005	18.4314
SRR10815957	SAMN13709562	PRJNA598656	Netherlands	Europe	79	12.9574	2.90263	451.392	58.2006	34.8367	13.3016
SRR10815966	SAMN13709554	PRJNA598656	Netherlands	Europe	79	15.7511	3.47485	551.859	69.1311	35.0363	15.7352
SRR10815965	SAMN13709555	PRJNA598656	Netherlands	Europe	77	19.0395	5.30407	678.262	148.536	35.6239	19.3662
SRR10815946	SAMN13709542	PRJNA598656	Netherlands	Europe	77	17.811	3.80928	655.486	80.2805	36.8023	17.1587
SRR10815954	SAMN13709565	PRJNA598656	Netherlands	Europe	66	14.3076	2.75816	540.815	66.5752	37.7992	17.8812
SRR10815955	SAMN13709564	PRJNA598656	Netherlands	Europe	36	18.7659	4.71199	737.162	88.3788	39.282	19.3752
SRR10815971	SAMN13709549	PRJNA598656	Netherlands	Europe	77	13.0049	3.3315	519.396	65.8298	39.9384	16.0356
SRR10815956	SAMN13709563	PRJNA598656	Netherlands	Europe	16	18.706	3.83385	755.801	95.3944	40.4042	17.8051
SRR10815942	SAMN13709546	PRJNA598656	Netherlands	Europe	77	18.302	5.76343	741.656	121.954	40.5231	18.2205
SRR10815962	SAMN13709557	PRJNA598656	Netherlands	Europe	16	17.554	3.08091	746.722	96.4563	42.5385	18.79
SRR10815963	SAMN13709539	PRJNA598656	Netherlands	Europe	64	17.3978	3.22535	746.767	95.6992	42.9231	19.2308
SRR10815967	SAMN13709553	PRJNA598656	Netherlands	Europe	16	14.302	3.02598	1107.56	128.853	77.441	17.2381
SRR11425550	SAMN14449835	PRJNA614926	USA	North America	16	25.2551	6.66799	259.63	115.877	10.2803	33.3572	doi: 10.1128/mSphere.01250-20
SRR11425549	SAMN14449835	PRJNA614926	USA	North America	18	18.9444	5.83206	303.023	109.026	15.9954	27.9805
SRR11785164	SAMN14598568	PRJNA632561	USA	North America	2	91.58	14.0845	609.556	118.204	6.656	89.1501	https://doi.org/10.1128/mbio.01803-21
SRR11785158	SAMN14598574	PRJNA632561	USA	North America	68	72.7863	6.46145	609.241	120.73	8.37027	71.325
SRR11785130	SAMN14598437	PRJNA632561	USA	North America	68	89.8715	11.1387	1097.27	294.122	12.2093	92.3445
SRR11785136	SAMN14598432	PRJNA632561	USA	North America	38	97.4978	11.731	1225.29	465.984	12.5674	100.236
SRR11785145	SAMN14598423	PRJNA632561	USA	North America	28	74.1198	8.5535	1042.77	229.585	14.0687	72.0513
SRR11785113	SAMN14598408	PRJNA632561	USA	North America	79	111.447	15.1583	1592.67	471.818	14.2909	112.191
SRR11785055	SAMN14598503	PRJNA632561	USA	North America	38	89.6677	9.46666	1297.28	276.546	14.4677	90.6107
SRR11785142	SAMN14598426	PRJNA632561	USA	North America	79	121.143	13.0005	1783.09	459.098	14.7189	121.719
SRR11785184	SAMN14598548	PRJNA632561	USA	North America	24	52.8715	9.07949	782.883	255.851	14.8073	51.1428
SRR11785214	SAMN14598521	PRJNA632561	USA	North America	79	84.7912	12.9639	1274.41	283.563	15.03	88.9828
SRR11785105	SAMN14598460	PRJNA632561	USA	North America	35	94.4577	11.9738	1470.81	390.571	15.5711	90.2039
SRR11785143	SAMN14598425	PRJNA632561	USA	North America	28	75.5269	10.0365	1252.91	313.481	16.589	77.1699
SRR11785123	SAMN14598443	PRJNA632561	USA	North America	79	80.42	13.6766	1346.46	151.624	16.7429	77.6114
SRR11785185	SAMN14598547	PRJNA632561	USA	North America	68	95.1828	11.0978	1625.7	442.544	17.0798	96.8377
SRR11785124	SAMN14598407	PRJNA632561	USA	North America	77	99.1489	12.0243	1715.79	355.777	17.3052	95.8143
SRR11785169	SAMN14598562	PRJNA632561	USA	North America	68	98.1569	20.0516	1722.49	504.935	17.5484	103.979
SRR11785141	SAMN14598427	PRJNA632561	USA	North America	79	154.378	13.8891	2726.2	554.882	17.6593	155.55
SRR11785100	SAMN14598464	PRJNA632561	USA	North America	28	101.778	13.4509	1827.43	524.641	17.955	108.218
SRR11785232	SAMN14598504	PRJNA632561	USA	North America	34	84.5633	9.84686	1518.83	349.152	17.9608	89.3842
SRR11785194	SAMN14598539	PRJNA632561	USA	North America	79	96.0513	11.0224	1755.53	452.802	18.277	103.126
SRR11785102	SAMN14598409	PRJNA632561	USA	North America	28	130.719	14.7771	2493.52	603.341	19.0754	124.695
SRR11785115	SAMN14598451	PRJNA632561	USA	North America	28	78.1309	7.28606	1490.58	273.183	19.078	79.0804
SRR11785144	SAMN14598424	PRJNA632561	USA	North America	68	89.202	12.9478	1704	442.301	19.1027	84.516
SRR11785210	SAMN14598524	PRJNA632561	USA	North America	79	114.073	12.5519	2182.67	588.08	19.134	120.388
SRR11785226	SAMN14598510	PRJNA632561	USA	North America	78	106.707	8.27506	2055.76	561.532	19.2655	108.711
SRR11785193	SAMN14598540	PRJNA632561	USA	North America	38	127.546	18.2366	2460.07	609.543	19.2877	126.683
SRR11785212	SAMN14598415	PRJNA632561	USA	North America	38	102.314	12.3874	1989.17	432.425	19.4418	99.7576
SRR11785171	SAMN14598560	PRJNA632561	USA	North America	2	132.267	12.0082	2589.2	434.281	19.5755	129.95
SRR11785201	SAMN14598416	PRJNA632561	USA	North America	79	82.7066	7.46875	1619.4	267.403	19.58	81.2284
SRR11785122	SAMN14598444	PRJNA632561	USA	North America	17	71.7455	12.733	1436.16	851.204	20.0174	89.4156
SRR11785187	SAMN14598545	PRJNA632561	USA	North America	68	91.9586	8.92498	1841.4	418.772	20.0242	93.4791
SRR11785220	SAMN14598515	PRJNA632561	USA	North America	38	122.275	8.77451	2451.19	614.556	20.0465	131.563
SRR11785192	SAMN14598541	PRJNA632561	USA	North America	67	101.738	12.8796	2055.64	566.158	20.2053	109.454
SRR11785116	SAMN14598450	PRJNA632561	USA	North America	68	95.7888	14.0056	1952.96	389.669	20.3882	96.3151
SRR11785148	SAMN14598421	PRJNA632561	USA	North America	38	81.5083	7.49852	1670.03	310.412	20.4891	79.5944
SRR11785080	SAMN14598411	PRJNA632561	USA	North America	79	107.283	10.0567	2228.86	483.848	20.7756	106.05
SRR11785126	SAMN14598441	PRJNA632561	USA	North America	67	91.8289	5.79115	1931.26	438.095	21.0311	88.9914
SRR11785157	SAMN14598420	PRJNA632561	USA	North America	68	96.8975	7.55438	2044.02	420.774	21.0946	107.308
SRR11785191	SAMN14598542	PRJNA632561	USA	North America	28	121.455	16.108	2596.69	662.373	21.3798	122.678
SRR11785218	SAMN14598517	PRJNA632561	USA	North America	68	132.271	12.2782	2876.4	528.359	21.7463	148.291
SRR11785231	SAMN14598505	PRJNA632561	USA	North America	28	121.266	11.3129	2644.29	555.169	21.8058	124.681
SRR11785069	SAMN14598412	PRJNA632561	USA	North America	68	106.295	13.9036	2317.88	827.138	21.8062	100.374
SRR11785195	SAMN14598538	PRJNA632561	USA	North America	68	105.452	8.662	2323.81	564.761	22.0366	109.033
SRR11785086	SAMN14598477	PRJNA632561	USA	North America	79	49.0593	4.96379	1082.37	128.143	22.0624	78.549
SRR11785186	SAMN14598546	PRJNA632561	USA	North America	68	88.5219	11.4081	1983.83	488.098	22.4106	96.4694
SRR11785152	SAMN14598579	PRJNA632561	USA	North America	2	94.3805	9.83126	2119.46	378.559	22.4566	93.8748
SRR11785071	SAMN14598491	PRJNA632561	USA	North America	11	89.9765	8.43484	2039.86	487.825	22.671	91.0741
SRR11785197	SAMN14598536	PRJNA632561	USA	North America	79	120.172	10.8193	2727.15	531.312	22.6938	126.882
SRR11785168	SAMN14598419	PRJNA632561	USA	North America	68	98.1439	10.4038	2230.01	492.39	22.7218	96.8245
SRR11785063	SAMN14598498	PRJNA632561	USA	North America	68	95.1353	10.3826	2164.13	471.228	22.7479	98.7985
SRR11785138	SAMN14598430	PRJNA632561	USA	North America	68	98.223	12.3471	2234.68	443.579	22.7511	97.2435
SRR11785161	SAMN14598571	PRJNA632561	USA	North America	2	66.0568	6.49373	1507.56	236.476	22.8221	80.0895
SRR11785179	SAMN14598418	PRJNA632561	USA	North America	79	79.4651	5.80316	1818.2	331.935	22.8804	89.5575
SRR11785209	SAMN14598525	PRJNA632561	USA	North America	79	99.9197	5.72417	2308.06	453.312	23.0992	101.159
SRR11785135	SAMN14598406	PRJNA632561	USA	North America	57	102.777	9.65007	2399.51	624.274	23.3467	106.065
SRR11785119	SAMN14598447	PRJNA632561	USA	North America	79	97.1816	9.89508	2286.66	537.147	23.5298	98.1746
SRR11785067	SAMN14598494	PRJNA632561	USA	North America	78	105.861	6.71767	2499.21	484.899	23.6084	110.082
SRR11785075	SAMN14598487	PRJNA632561	USA	North America	38	104.548	10.1973	2489.4	542.658	23.811	106.288
SRR11785198	SAMN14598535	PRJNA632561	USA	North America	68	123.132	18.6282	2950.44	541.79	23.9617	126.67
SRR11785190	SAMN14598417	PRJNA632561	USA	North America	79	70.7165	5.43036	1695.99	339.778	23.9829	77.9213
SRR11785204	SAMN14598530	PRJNA632561	USA	North America	75	106.487	9.72923	2555.05	484.438	23.9939	111.128
SRR11785228	SAMN14598508	PRJNA632561	USA	North America	79	112.35	15.6769	2714.29	767.084	24.1593	121.799
SRR11785151	SAMN14598580	PRJNA632561	USA	North America	2	84.1081	11.2426	2047.27	228.825	24.3409	85.9776
SRR11785199	SAMN14598534	PRJNA632561	USA	North America	10	119.474	12.4	2924.05	595.675	24.4743	121.903
SRR11785140	SAMN14598428	PRJNA632561	USA	North America	79	74.26	8.60533	1820.96	310.639	24.5214	75.5671
SRR11785091	SAMN14598410	PRJNA632561	USA	North America	68	96.4546	10.8215	2372.71	592.379	24.5992	101.16
SRR11785128	SAMN14598439	PRJNA632561	USA	North America	64	88.9944	7.99548	2207.55	442.663	24.8055	102.682
SRR11785229	SAMN14598507	PRJNA632561	USA	North America	72	108.106	15.3963	2694.66	755.59	24.926	107.895
SRR11785139	SAMN14598429	PRJNA632561	USA	North America	79	83.5009	13.1806	2087.96	464.201	25.0052	83.4724
SRR11785101	SAMN14598463	PRJNA632561	USA	North America	67	101.985	11.4249	2568.18	456.946	25.182	105.142
SRR11785170	SAMN14598561	PRJNA632561	USA	North America	79	89.4793	10.3313	2257.53	517.445	25.2297	94.7442
SRR11785159	SAMN14598573	PRJNA632561	USA	North America	2	77.3286	17.8639	1952.61	358.636	25.2508	80.7216
SRR11785208	SAMN14598526	PRJNA632561	USA	North America	28	84.3626	9.48625	2147.09	435.155	25.4508	80.1641
SRR11785181	SAMN14598551	PRJNA632561	USA	North America	75	144.821	15.2784	3703.71	863.614	25.5744	149.062
SRR11785156	SAMN14598575	PRJNA632561	USA	North America	68	75.5528	8.45216	1934.47	466.079	25.6041	87.8754
SRR11785177	SAMN14598554	PRJNA632561	USA	North America	64	131.049	12.9186	3375.78	614.103	25.7597	137.334
SRR11785066	SAMN14598495	PRJNA632561	USA	North America	68	93.698	13.5682	2421.34	485.051	25.842	104.924
SRR11785155	SAMN14598576	PRJNA632561	USA	North America	79	93.945	6.81778	2439.48	634.21	25.9671	99.676
SRR11785057	SAMN14598404	PRJNA632561	USA	North America	79	125.091	10.049	3262.21	457.52	26.0787	124.454
SRR11785153	SAMN14598578	PRJNA632561	USA	North America	38	58.6751	5.8887	1531.09	215.863	26.0944	62.8401
SRR11785074	SAMN14598488	PRJNA632561	USA	North America	64	83.4058	12.1334	2185.25	451.25	26.2002	89.0159
SRR11785103	SAMN14598462	PRJNA632561	USA	North America	68	81.4101	7.97771	2167.07	485.154	26.6192	87.2457
SRR11785131	SAMN14598436	PRJNA632561	USA	North America	28	103.151	16.4913	2758.45	323.75	26.7418	110.651
SRR11785056	SAMN14598413	PRJNA632561	USA	North America	68	81.916	6.01197	2221.09	340.919	27.1142	86.8794
SRR11785213	SAMN14598522	PRJNA632561	USA	North America	28	103.179	7.63004	2797.84	584.295	27.1163	107.088
SRR11785088	SAMN14598475	PRJNA632561	USA	North America	79	59.1939	7.22134	1608.82	233.216	27.1788	59.5793
SRR12081224	SAMN15356935	PRJNA632561	USA	North America	68	117.398	14.5997	3195.8	723.637	27.2219	126.173
SRR11785196	SAMN14598537	PRJNA632561	USA	North America	28	90.882	9.91747	2474	495.794	27.2221	90.0794
SRR11785134	SAMN14598433	PRJNA632561	USA	North America	79	112.347	14.2312	3091.59	459.3	27.5183	114.773
SRR11785098	SAMN14598466	PRJNA632561	USA	North America	79	78.9148	13.0135	2173.88	223.719	27.5471	82.9832
SRR11785207	SAMN14598527	PRJNA632561	USA	North America	68	104.053	11.5523	2892.34	485.498	27.7967	114.562
SRR11785174	SAMN14598557	PRJNA632561	USA	North America	28	112.097	13.0913	3143.56	525.757	28.0433	112.706
SRR11785073	SAMN14598489	PRJNA632561	USA	North America	63	89.6553	9.87579	2580.39	574.501	28.7812	104.773
SRR11785062	SAMN14598499	PRJNA632561	USA	North America	34	116.882	12.6917	3369.42	501.9	28.8275	123.674
SRR11785058	SAMN14598403	PRJNA632561	USA	North America	24	118.008	13.1564	3410.86	728.182	28.9036	120.821
SRR11785221	SAMN14598514	PRJNA632561	USA	North America	79	126.683	12.949	3682.8	633.391	29.0711	125.36
SRR11785060	SAMN14598501	PRJNA632561	USA	North America	28	98.2712	10.844	2864.22	363.162	29.1461	93.8408
SRR11785117	SAMN14598449	PRJNA632561	USA	North America	27	88.8888	11.7664	2628.96	506.436	29.5758	91.2233
SRR11785178	SAMN14598553	PRJNA632561	USA	North America	79	101.783	8.59495	3023.7	651.786	29.7072	112.436
SRR11785093	SAMN14598471	PRJNA632561	USA	North America	38	116.494	14.4156	3470.27	499.47	29.7892	127.776
SRR11785107	SAMN14598458	PRJNA632561	USA	North America	79	69.9969	9.31906	2096.75	332.921	29.9549	78.2482
SRR11785202	SAMN14598532	PRJNA632561	USA	North America	68	113.51	10.9424	3420.22	455.699	30.1314	127.759
SRR11785106	SAMN14598459	PRJNA632561	USA	North America	28	66.6109	9.25964	2012.2	228.34	30.2082	62.8433
SRR11785182	SAMN14598550	PRJNA632561	USA	North America	38	136.166	10.947	4149.6	924.911	30.4747	148.288
SRR11785089	SAMN14598474	PRJNA632561	USA	North America	79	56.8796	7.88834	1759.6	292.784	30.9355	68.3589
SRR11785188	SAMN14598544	PRJNA632561	USA	North America	68	73.3792	7.00887	2295.5	412.462	31.2827	79.4042
SRR11785110	SAMN14598455	PRJNA632561	USA	North America	79	76.8443	11.5784	2435.68	360.454	31.6962	85.824
SRR11785084	SAMN14598479	PRJNA632561	USA	North America	68	105.671	13.2203	3355.99	513.908	31.7589	112.182
SRR11785068	SAMN14598493	PRJNA632561	USA	North America	79	101.431	14.1956	3224.49	570.441	31.79	105.938
SRR11785225	SAMN14598511	PRJNA632561	USA	North America	67	108.087	10.5411	3443.45	603.708	31.8581	118.826
SRR11785147	SAMN14598422	PRJNA632561	USA	North America	57	55.446	7.65713	1775.3	425.973	32.0186	62.6542
SRR11785223	SAMN14598414	PRJNA632561	USA	North America	36	80.3317	13.2643	2574.52	387.102	32.0486	85.3698
SRR11785085	SAMN14598478	PRJNA632561	USA	North America	68	59.6683	11.0119	1912.49	302.422	32.052	70.8694
SRR11785200	SAMN14598533	PRJNA632561	USA	North America	68	83.8382	9.13718	2720.61	418.313	32.4507	87.3493
SRR11785121	SAMN14598445	PRJNA632561	USA	North America	57	59.155	7.79227	1930.37	530.062	32.6324	63.691
SRR11785082	SAMN14598481	PRJNA632561	USA	North America	68	132.662	12.2695	4363.29	732.576	32.8904	148.353
SRR11785129	SAMN14598438	PRJNA632561	USA	North America	67	99.6337	10.6165	3371.05	356.973	33.8344	101.165
SRR11785120	SAMN14598446	PRJNA632561	USA	North America	38	92.239	16.6703	3128	326.689	33.9119	100.183
SRR11785211	SAMN14598523	PRJNA632561	USA	North America	67	111.797	9.57449	3854.28	569.474	34.4756	117.465
SRR11785064	SAMN14598497	PRJNA632561	USA	North America	68	96.181	9.2237	3321.01	774.684	34.5287	106.729
SRR11785133	SAMN14598434	PRJNA632561	USA	North America	28	73.685	10.1011	2547.44	570.829	34.572	85.4366
SRR11785215	SAMN14598520	PRJNA632561	USA	North America	68	75.4385	6.01094	2617.1	461.5	34.6918	76.2735
SRR11785104	SAMN14598461	PRJNA632561	USA	North America	68	80.6751	6.4806	2800.85	575.778	34.7176	91.4268
SRR11785146	SAMN14598405	PRJNA632561	USA	North America	68	89.1804	10.3189	3106.34	451.787	34.8321	98.7785
SRR11785109	SAMN14598456	PRJNA632561	USA	North America	38	82.0797	9.37295	2866.96	514.372	34.929	88.3038
SRR11785118	SAMN14598448	PRJNA632561	USA	North America	68	112.403	10.2897	3981.31	675.715	35.4201	119.683
SRR11785079	SAMN14598483	PRJNA632561	USA	North America	38	111.71	14.1101	3967.6	571.805	35.5171	115.726
SRR11785114	SAMN14598452	PRJNA632561	USA	North America	38	64.916	8.19088	2332.25	274.345	35.9271	65.4746
SRR11785087	SAMN14598476	PRJNA632561	USA	North America	28	68.7801	8.70935	2492.06	346.964	36.2322	74.1956
SRR11785072	SAMN14598490	PRJNA632561	USA	North America	31	85.8073	9.92481	3122.23	615.173	36.3865	85.232
SRR11785137	SAMN14598431	PRJNA632561	USA	North America	68	107.737	13.4574	3934.4	330.562	36.5184	119.847
SRR11785165	SAMN14598565	PRJNA632561	USA	North America	68	53.4571	8.4574	1959.04	237.469	36.647	58.5423
SRR11785094	SAMN14598470	PRJNA632561	USA	North America	68	28.9537	4.54911	1062.27	106.243	36.6886	34.4427
SRR11785065	SAMN14598496	PRJNA632561	USA	North America	68	92.672	8.88231	3428.41	679.723	36.9951	106.027
SRR11785189	SAMN14598543	PRJNA632561	USA	North America	38	66.9574	7.04006	2479.68	403.754	37.0337	73.1031
SRR11785095	SAMN14598469	PRJNA632561	USA	North America	78	65.336	10.5527	2420.45	256.266	37.0462	72.8395
SRR11785070	SAMN14598492	PRJNA632561	USA	North America	28	118.188	10.7848	4422.86	569.843	37.4221	129.321
SRR11785099	SAMN14598465	PRJNA632561	USA	North America	68	93.8863	12.3649	3514.51	502.42	37.4337	99.4424
SRR11785230	SAMN14598506	PRJNA632561	USA	North America	38	47.1655	8.16811	1814.55	156.185	38.472	51.2618
SRR11785167	SAMN14598563	PRJNA632561	USA	North America	68	83.0439	8.38659	3233.95	406.205	38.9427	78.7794
SRR11785175	SAMN14598556	PRJNA632561	USA	North America	67	64.7097	8.76071	2525.23	272.127	39.024	66.6021
SRR11785205	SAMN14598529	PRJNA632561	USA	North America	68	56.9549	10.9977	2227.05	274.2	39.1021	68.1691
SRR11785180	SAMN14598552	PRJNA632561	USA	North America	11	108.548	13.5765	4369.74	595.974	40.2561	122.092
SRR11785160	SAMN14598572	PRJNA632561	USA	North America	11	59.9568	8.55228	2421.06	431.471	40.3801	72.5169
SRR11785083	SAMN14598480	PRJNA632561	USA	North America	38	51.9246	7.15823	2122.19	242.244	40.8705	60.5097
SRR11785227	SAMN14598509	PRJNA632561	USA	North America	79	97.8666	13.7576	4067.07	440.411	41.5573	100.242
SRR11785149	SAMN14598567	PRJNA632561	USA	North America	5	55.0099	7.7732	2293.24	334.264	41.6878	60.0861
SRR11785216	SAMN14598519	PRJNA632561	USA	North America	68	85.6257	9.74461	3592.92	466.118	41.9608	93.3183
SRR11785206	SAMN14598528	PRJNA632561	USA	North America	67	119.749	16.8355	5128.04	618.392	42.8232	116.933
SRR11785219	SAMN14598516	PRJNA632561	USA	North America	36	99.5306	9.68449	4280.97	531.364	43.0116	109.684
SRR11785222	SAMN14598513	PRJNA632561	USA	North America	68	104.634	16.1511	4522.53	458.184	43.2222	118.511
SRR11785183	SAMN14598549	PRJNA632561	USA	North America	68	65.3397	6.79667	2836.01	562.837	43.404	76.7913
SRR11785173	SAMN14598558	PRJNA632561	USA	North America	11	75.9951	9.23923	3302.64	314.982	43.4587	82.9416
SRR11785090	SAMN14598473	PRJNA632561	USA	North America	78	57.6646	6.01157	2561.27	383.982	44.4167	66.027
SRR11785150	SAMN14598566	PRJNA632561	USA	North America	5	53.4725	7.91735	2385.21	236.414	44.6063	56.5811
SRR11785176	SAMN14598555	PRJNA632561	USA	North America	38	107.556	9.60427	4812.9	574.422	44.7479	112.904
SRR11785162	SAMN14598570	PRJNA632561	USA	North America	2	45.0031	6.84668	2053.26	222.112	45.6249	55.9001
SRR11785081	SAMN14598482	PRJNA632561	USA	North America	68	76.5584	12.2096	3496.95	762.229	45.677	99.017
SRR11785125	SAMN14598442	PRJNA632561	USA	North America	68	82.8758	9.61509	3830.22	443.783	46.2164	93.4181
SRR11785154	SAMN14598577	PRJNA632561	USA	North America	11	67.3113	11.6591	3136.72	408.172	46.6002	72.873
SRR11785108	SAMN14598457	PRJNA632561	USA	North America	68	73.4824	7.34461	3430.97	393.47	46.6911	81.0336
SRR11785127	SAMN14598440	PRJNA632561	USA	North America	68	37.2687	3.72627	1746.48	210.78	46.8619	42.1069
SRR11785163	SAMN14598569	PRJNA632561	USA	North America	11	54.6146	8.53595	2625.42	397.954	48.0717	61.0022
SRR11785061	SAMN14598500	PRJNA632561	USA	North America	64	71.0544	8.95978	3486.53	377.513	49.0684	69.661
SRR11785078	SAMN14598484	PRJNA632561	USA	North America	68	106.009	14.4697	5267.73	888.874	49.6915	122.209
SRR11785132	SAMN14598435	PRJNA632561	USA	North America	67	94.3193	10.558	4937.06	447.601	52.3441	97.1563
SRR11785096	SAMN14598468	PRJNA632561	USA	North America	68	43.8252	5.70676	2295.36	204.439	52.3754	91.9048
SRR11785112	SAMN14598453	PRJNA632561	USA	North America	67	69.8783	8.51527	3752.21	325.1	53.6963	76.85
SRR11785097	SAMN14598467	PRJNA632561	USA	North America	68	82.664	9.63215	4439.26	807.311	53.7025	88.4651
SRR11785166	SAMN14598564	PRJNA632561	USA	North America	68	45.4645	7.45032	2486.52	241.51	54.6915	53.3009
SRR11785203	SAMN14598531	PRJNA632561	USA	North America	79	111.725	14.3154	6264.46	645.987	56.0703	131.253
SRR11785224	SAMN14598512	PRJNA632561	USA	North America	38	105.288	10.3824	6048.19	569.443	57.444	112.71
SRR11785059	SAMN14598502	PRJNA632561	USA	North America	68	87.8962	13.0525	5095.66	884.518	57.9736	94.3437
SRR11785111	SAMN14598454	PRJNA632561	USA	North America	38	66.2798	11.7094	4137.93	302.168	62.4312	76.1457
SRR11785217	SAMN14598518	PRJNA632561	USA	North America	68	35.8752	5.95838	2266.04	219.307	63.1644	68.9495
SRR11785077	SAMN14598485	PRJNA632561	USA	North America	79	75.9185	12.2676	5351.91	1034.01	70.4955	96.1295
SRR11785092	SAMN14598472	PRJNA632561	USA	North America	78	63.5695	7.23083	4845.03	557.129	76.2163	67.7704
SRR11785076	SAMN14598486	PRJNA632561	USA	North America	64	72.1729	7.8081	5567.8	777.523	77.1453	91.3876
SRR11785172	SAMN14598559	PRJNA632561	USA	North America	2	81.8845	11.4128	7111.03	985.717	86.8422	98.8787
SRR12190182	SAMN15486848	PRJNA638646	Japan	Asia	79	233.773	23.1279	3105.5	385.77	13.2843	369.745	https://doi.org/10.3389/ffunb.2020.617338
SRR12190178	SAMN15486852	PRJNA638646	Japan	Asia	79	110.745	15.3876	1795.01	212.483	16.2085	138.565
SRR11977842	SAMN15199857	PRJNA638646	Japan	Asia	75	113.637	10.9965	1862.47	228.023	16.3896	125.711
SRR11977810	SAMN15199835	PRJNA638646	Japan	Asia	8	118.558	9.5741	1969.62	404.782	16.6131	133.87
SRR11977821	SAMN15199832	PRJNA638646	Japan	Asia	68	118.896	12.117	1993.18	205.973	16.7641	133.715
SRR11977845	SAMN15199855	PRJNA638646	Japan	Asia	75	111.13	10.4452	1880.05	188.907	16.9176	124.775
SRR11977866	SAMN15199827	PRJNA638646	Japan	Asia	68	128.697	14.8089	2183.42	249.73	16.9656	141.178
SRR12190175	SAMN15486855	PRJNA638646	Japan	Asia	68	144.809	22.5385	2490.21	645.933	17.1965	164.645
SRR11977836	SAMN15199863	PRJNA638646	Japan	Asia	64	110.043	9.87246	1907.48	210.307	17.334	122.21
SRR11977832	SAMN15199831	PRJNA638646	Japan	Asia	75	97.9351	8.31808	1700.25	199.863	17.361	120.845
SRR11977833	SAMN15199866	PRJNA638646	Japan	Asia	68	99.9617	8.58023	1754.21	172.256	17.5488	109.354
SRR11977847	SAMN15199853	PRJNA638646	Japan	Asia	68	107.685	10.4923	1900.64	189.052	17.65	119.814
SRR11977812	SAMN15199833	PRJNA638646	Japan	Asia	79	119.86	13.2611	2128.13	256.983	17.7551	136.019
SRR12190183	SAMN15486847	PRJNA638646	Japan	Asia	38	170.492	15.9839	3034	340.814	17.7956	199.584
SRR11977831	SAMN15199867	PRJNA638646	Japan	Asia	79	116.412	11.8862	2095.53	200.288	18.001	131.168
SRR11977851	SAMN15199849	PRJNA638646	Japan	Asia	68	113.556	13.3501	2078.03	289.769	18.2997	125.99
SRR11977855	SAMN15199846	PRJNA638646	Japan	Asia	38	124.032	8.11663	2339.64	278.613	18.8633	135.866
SRR11977857	SAMN15199844	PRJNA638646	Japan	Asia	28	109.511	13.7591	2085.68	232.969	19.0454	131.695
SRR11977844	SAMN15199856	PRJNA638646	Japan	Asia	51	88.4719	8.16742	1695.12	159.666	19.1599	105.691
SRR11977839	SAMN15199860	PRJNA638646	Japan	Asia	11	158.797	16.4325	3049.17	314.499	19.2017	182.673
SRR11977850	SAMN15199850	PRJNA638646	Japan	Asia	79	103.797	11.1574	2018.76	224.18	19.4491	122.827
SRR11977854	SAMN15199829	PRJNA638646	Japan	Asia	68	113.956	13.1595	2216.6	228.896	19.4514	136.595
SRR11977826	SAMN15199872	PRJNA638646	Japan	Asia	79	107.403	7.57825	2090.95	205.922	19.4683	123.721
SRR12190174	SAMN15486856	PRJNA638646	Japan	Asia	28	145.781	11.0213	2857.74	320.6	19.6029	173.547
SRR11977843	SAMN15199830	PRJNA638646	Japan	Asia	64	103.331	8.79356	2052.96	203.6	19.8678	118.413
SRR11977815	SAMN15199882	PRJNA638646	Japan	Asia	75	114.428	8.6808	2276.39	253.535	19.8937	129.135
SRR12190176	SAMN15486854	PRJNA638646	Japan	Asia	78	139.025	11.5009	2784.41	549.405	20.0281	153.648
SRR11977858	SAMN15199843	PRJNA638646	Japan	Asia	77	152.934	15.7289	3066.82	294.088	20.0532	180.042
SRR11977848	SAMN15199852	PRJNA638646	Japan	Asia	79	91.2458	8.26179	1840.03	188.181	20.1656	108.62
SRR11977837	SAMN15199862	PRJNA638646	Japan	Asia	79	112.702	14.2345	2275.68	246.487	20.1921	125.57
SRR11977834	SAMN15199865	PRJNA638646	Japan	Asia	68	107.152	10.3391	2169.01	226.682	20.2424	131.428
SRR11977849	SAMN15199851	PRJNA638646	Japan	Asia	79	98.5411	11.0795	2007.35	216.923	20.3707	119.11
SRR11977863	SAMN15199838	PRJNA638646	Japan	Asia	11	124.681	10.8234	2557.63	223.868	20.5135	147.516
SRR11977818	SAMN15199879	PRJNA638646	Japan	Asia	79	120.811	11.1496	2480.76	259.899	20.5342	137.001
SRR11977828	SAMN15199870	PRJNA638646	Japan	Asia	68	103.471	9.20913	2136.81	204.766	20.6514	124.285
SRR11977853	SAMN15199847	PRJNA638646	Japan	Asia	75	124.345	13.2702	2609.43	250.336	20.9854	140.64
SRR11977816	SAMN15199881	PRJNA638646	Japan	Asia	78	106.149	13.5386	2229.35	219.722	21.002	117.983
SRR12190180	SAMN15486850	PRJNA638646	Japan	Asia	38	180.998	21.5945	3803.85	422.529	21.0161	232.611
SRR11977852	SAMN15199848	PRJNA638646	Japan	Asia	68	106.174	10.6427	2232.46	241.939	21.0264	116.056
SRR11977841	SAMN15199858	PRJNA638646	Japan	Asia	38	119.98	16.2333	2534.99	250.608	21.1285	129.826
SRR11977856	SAMN15199845	PRJNA638646	Japan	Asia	68	100.847	11.8223	2139.62	271.827	21.2166	126.425
SRR11977817	SAMN15199880	PRJNA638646	Japan	Asia	79	135.708	13.7955	2889.31	290.951	21.2907	157.379
SRR11977811	SAMN15199834	PRJNA638646	Japan	Asia	68	103.112	14.0152	2203.64	218.405	21.3712	119.411
SRR12190181	SAMN15486849	PRJNA638646	Japan	Asia	28	171.681	21.5395	3689.72	400.934	21.4918	219.596
SRR11977813	SAMN15199884	PRJNA638646	Japan	Asia	38	109.322	8.26806	2353.69	197.255	21.5298	123.657
SRR11977835	SAMN15199864	PRJNA638646	Japan	Asia	68	107.237	10.611	2311.77	245.109	21.5576	127.924
SRR11977862	SAMN15199839	PRJNA638646	Japan	Asia	79	117.71	11.1362	2559.48	323.274	21.7439	141.484
SRR11977825	SAMN15199873	PRJNA638646	Japan	Asia	28	114.043	10.0129	2521.54	231.686	22.1103	132.725
SRR12190177	SAMN15486853	PRJNA638646	Japan	Asia	3	126.304	8.32002	2814.58	308.682	22.2842	152.507
SRR11977846	SAMN15199854	PRJNA638646	Japan	Asia	79	141.583	13.6181	3161.9	387.214	22.3325	172.317
SRR11977861	SAMN15199840	PRJNA638646	Japan	Asia	68	153.885	14.7815	3593.29	361.518	23.3505	185.094
SRR11977814	SAMN15199883	PRJNA638646	Japan	Asia	68	117.076	8.51239	2750.73	243.107	23.4953	139.968
SRR11977824	SAMN15199874	PRJNA638646	Japan	Asia	78	122.487	14.1755	2896.66	280.483	23.6488	136.491
SRR12190179	SAMN15486851	PRJNA638646	Japan	Asia	38	168.433	11.1792	4059.75	441.076	24.1031	208.405
SRR11977838	SAMN15199861	PRJNA638646	Japan	Asia	79	101.056	10.7149	2444.62	281.188	24.1907	118.176
SRR11977864	SAMN15199837	PRJNA638646	Japan	Asia	64	110.166	12.3326	2686.54	238.605	24.3864	131.136
SRR11977820	SAMN15199877	PRJNA638646	Japan	Asia	67	111.235	9.03902	2726.49	335.162	24.5112	122.443
SRR11977823	SAMN15199875	PRJNA638646	Japan	Asia	79	128.96	11.9041	3172.14	282.029	24.5977	146.693
SRR11977865	SAMN15199828	PRJNA638646	Japan	Asia	31	103.857	12.1599	2606.41	543.246	25.0962	119.921
SRR11977809	SAMN15199836	PRJNA638646	Japan	Asia	77	118.749	8.23379	3043.06	351.875	25.626	141.8
SRR11977859	SAMN15199842	PRJNA638646	Japan	Asia	28	103.422	8.4966	2773.66	287.364	26.8189	126.25
SRR11977860	SAMN15199841	PRJNA638646	Japan	Asia	38	117.67	12.2635	3176.55	377.454	26.9954	143.224
SRR11977829	SAMN15199869	PRJNA638646	Japan	Asia	79	96.3564	10.7278	2697.72	346.534	27.9973	126.336
SRR11977830	SAMN15199868	PRJNA638646	Japan	Asia	38	99.2347	10.9511	2884.09	248.824	29.0633	123.497
SRR11977827	SAMN15199871	PRJNA638646	Japan	Asia	77	113.548	12.4265	3442.24	272.88	30.3153	136.835
SRR11977840	SAMN15199859	PRJNA638646	Japan	Asia	11	113.204	11.5552	3718.95	346.767	32.8517	139.81
SRR11977822	SAMN15199876	PRJNA638646	Japan	Asia	28	125.57	12.6972	5673.85	538.045	45.1847	147.778
SRR11977819	SAMN15199878	PRJNA638646	Japan	Asia	38	110.036	8.53003	5856.73	609.041	53.2257	133.657
SRR12825367	SAMN15915637	PRJNA659567	USA	North America	28	71.6195	7.82668	642.333	122.367	8.96869	85.5149	SRA
SRR17971427	SAMN25829301	PRJNA666755	Netherlands	Europe	5	39.979	6.40492	297.126	29.4054	7.43205	49.9815	doi: 10.3390/jof6040277
SRR17971426	SAMN25829302	PRJNA666755	Netherlands	Europe	5	39.2069	7.44804	295.771	25.7074	7.54384	49.6716
SRR17971428	SAMN25829300	PRJNA666755	Netherlands	Europe	5	35.3545	7.73337	298.443	40.6948	8.44143	47.4285
SRR12763084	SAMN16338511	PRJNA666940	USA	North America	77	49.223	8.50378	445.845	157.504	9.05766	51.8258	https://doi.org/10.1128/mbio.02153-21
SRR12763116	SAMN16338464	PRJNA666940	USA	North America	28	29.8036	8.9086	289.601	112.467	9.71699	31.592
SRR12763101	SAMN16338495	PRJNA666940	USA	North America	79	76.9432	13.0424	796.842	304.465	10.3562	78.0048
SRR12763128	SAMN16338462	PRJNA666940	USA	North America	28	9.83138	4.2632	124.083	49.2801	12.6211	12.1314
SRR12763127	SAMN16338463	PRJNA666940	USA	North America	79	113.392	24.7577	1508.46	583.662	13.303	169.116
SRR12763095	SAMN16338501	PRJNA666940	USA	North America	79	38.4151	6.89221	514.858	63.3796	13.4025	40.7644
SRR12763077	SAMN16338470	PRJNA666940	USA	North America	38	23.5442	6.00286	325.022	152.483	13.8048	22.983
SRR12763078	SAMN16338469	PRJNA666940	USA	North America	75	52.0846	11.6501	790.72	299.505	15.1815	64.2194
SRR12763083	SAMN16338467	PRJNA666940	USA	North America	77	49.3712	8.77743	791.383	287.956	16.0292	61.4748
SRR12763093	SAMN16338502	PRJNA666940	USA	North America	79	42.4132	10.1687	684.265	90.9182	16.1333	44.2089
SRR12763086	SAMN16338509	PRJNA666940	USA	North America	68	55.7146	10.4581	900.735	115.418	16.1669	60.3579
SRR12763105	SAMN16338465	PRJNA666940	USA	North America	79	18.2119	4.34344	298.188	117.068	16.3733	23.1926
SRR12763079	SAMN16338468	PRJNA666940	USA	North America	28	43.9327	12.4244	730.315	281.142	16.6235	53.7203
SRR12763091	SAMN16338504	PRJNA666940	USA	North America	79	47.357	9.9575	807.579	104.646	17.053	46.2658
SRR12763102	SAMN16338494	PRJNA666940	USA	North America	79	5.81902	2.12931	103.736	33.2395	17.827	8.11021
SRR12763092	SAMN16338503	PRJNA666940	USA	North America	79	33.8647	5.67417	653.69	79.4785	19.303	34.9009
SRR12763098	SAMN16338498	PRJNA666940	USA	North America	28	110.63	17.3873	2141.76	233.941	19.3596	123.092
SRR12763099	SAMN16338497	PRJNA666940	USA	North America	79	78.7029	14.7146	1524.49	161.798	19.3702	81.2135
SRR12763080	SAMN16338514	PRJNA666940	USA	North America	28	11.0371	4.36922	234.683	70.1481	21.2632	21.0437
SRR12763125	SAMN16338473	PRJNA666940	USA	North America	38	38.3644	9.26412	816.818	264.471	21.291	47.5498
SRR12763090	SAMN16338505	PRJNA666940	USA	North America	68	61.6541	8.14646	1312.7	155.237	21.2913	60.7956
SRR12763124	SAMN16338474	PRJNA666940	USA	North America	79	42.1044	12.551	935.444	276.502	22.2173	58.0195
SRR12763089	SAMN16338506	PRJNA666940	USA	North America	68	43.0624	6.66201	980.188	113.974	22.762	48.6587
SRR12763126	SAMN16338472	PRJNA666940	USA	North America	79	14.1495	5.51556	335.83	103.977	23.7344	17.7435
SRR12763076	SAMN16338471	PRJNA666940	USA	North America	78	15.4299	8.71215	366.497	112.53	23.7524	20.9704
SRR12763118	SAMN16338480	PRJNA666940	USA	North America	79	54.5664	8.48942	1301.72	178.409	23.8556	61.8908
SRR12763119	SAMN16338479	PRJNA666940	USA	North America	68	35.8363	5.16236	856.882	116.55	23.911	39.7952
SRR12763087	SAMN16338508	PRJNA666940	USA	North America	28	58.1946	10.083	1450.3	216.52	24.9216	66.3799
SRR12763123	SAMN16338475	PRJNA666940	USA	North America	79	17.6862	5.56835	475.755	147.127	26.8997	22.4487
SRR12763094	SAMN16338466	PRJNA666940	USA	North America	79	5.81594	2.98918	157.748	62.6394	27.1234	11.1975
SRR12763085	SAMN16338510	PRJNA666940	USA	North America	28	34.5645	5.9411	968.877	113.6	28.031	36.5896
SRR12763100	SAMN16338496	PRJNA666940	USA	North America	79	48.8511	8.58604	1398.09	167.578	28.6193	57.5137
SRR12763097	SAMN16338499	PRJNA666940	USA	North America	79	28.7072	6.29641	830.987	93.6132	28.947	30.9775
SRR12763114	SAMN16338483	PRJNA666940	USA	North America	75	38.9938	6.62019	1146.41	135.025	29.3998	46.1959
SRR12763117	SAMN16338481	PRJNA666940	USA	North America	79	49.6868	4.98367	1505.64	154.051	30.3026	64.7279
SRR12763111	SAMN16338486	PRJNA666940	USA	North America	78	33.1939	6.15504	1017.68	104.074	30.6587	32.7481
SRR12763103	SAMN16338493	PRJNA666940	USA	North America	68	36.4713	5.63931	1157.96	134.356	31.75	38.0559
SRR12763088	SAMN16338507	PRJNA666940	USA	North America	28	49.3879	9.76512	1584.77	185.322	32.0883	55.6544
SRR12763108	SAMN16338489	PRJNA666940	USA	North America	79	41.3885	5.33968	1336.16	144.748	32.2832	46.2379
SRR12763109	SAMN16338488	PRJNA666940	USA	North America	77	29.2187	4.64916	951.394	109.414	32.5612	35.5352
SRR12763082	SAMN16338512	PRJNA666940	USA	North America	79	41.8542	5.39993	1429.11	182.398	34.1448	47.4515
SRR12763081	SAMN16338513	PRJNA666940	USA	North America	79	59.5466	5.24017	2036.12	322.064	34.1937	68.7307
SRR12763104	SAMN16338492	PRJNA666940	USA	North America	79	51.7585	7.54969	1787.6	225.998	34.5374	55.8506
SRR12763112	SAMN16338485	PRJNA666940	USA	North America	25	41.181	6.3267	1479.84	317.03	35.9351	45.7815
SRR12763106	SAMN16338491	PRJNA666940	USA	North America	79	37.3792	7.68401	1439.51	197.736	38.5109	45.8353
SRR12763115	SAMN16338482	PRJNA666940	USA	North America	57	49.853	10.3713	1971.68	410.32	39.5499	60.2368
SRR12763122	SAMN16338476	PRJNA666940	USA	North America	79	34.9401	6.34539	1449.9	116.392	41.4968	40.3575
SRR12763113	SAMN16338484	PRJNA666940	USA	North America	28	26.9716	4.04675	1127.44	125.176	41.8009	36.8119
SRR12763107	SAMN16338490	PRJNA666940	USA	North America	38	30.8863	4.22433	1295.94	156.022	41.9584	35.7325
SRR12763096	SAMN16338500	PRJNA666940	USA	North America	28	33.5046	6.06723	1424.28	148.983	42.51	41.0293
SRR12763121	SAMN16338477	PRJNA666940	USA	North America	38	38.6523	5.91196	1870.64	156.961	48.3968	49.7884
SRR12763120	SAMN16338478	PRJNA666940	USA	North America	68	38.546	8.26288	2032.62	142.755	52.7324	50.8052
SRR12763110	SAMN16338487	PRJNA666940	USA	North America	68	27.3935	4.82284	1837.47	214.77	67.077	38.373
SRR14584238	SAMN19246804	PRJNA666940	United Kingdom	Europe	79	17.0723	4.44417	146.476	59.7092	8.57978	20.2965	https://doi.org/10.3390/genes9070363 https://doi.org/10.1371/journal.pbio.3001890
SRR14584239	SAMN19246803	PRJNA666940	USA	North America	28	41.3453	12.9332	411.085	182.26	9.94273	54.538
SRR14584223	SAMN19246818	PRJNA666940	USA	North America	79	38.9697	6.75684	345.498	326.645	8.86581	48.6546	https://doi.org/10.1371/journal.pbio.3001890
SRR14584246	SAMN19246797	PRJNA666940	USA	North America	78	25.1124	5.78592	240.685	108.689	9.58431	30.4067
SRR14584240	SAMN19246802	PRJNA666940	USA	North America	79	14.9222	4.39829	144.482	67.6724	9.68237	17.4371
SRR14584247	SAMN19246796	PRJNA666940	USA	North America	28	19.4861	5.67052	193.95	76.1499	9.95323	23.1847
SRR14584252	SAMN19246791	PRJNA666940	USA	North America	79	12.861	5.36629	136.016	59.0826	10.5759	13.7353
SRR14584241	SAMN19246801	PRJNA666940	USA	North America	79	23.2823	4.72547	250.704	109.31	10.768	30.2849
SRR14584231	SAMN19246766	PRJNA666940	USA	North America	79	20.2891	4.31434	225.317	103.371	11.1053	23.6531
SRR14584244	SAMN19246799	PRJNA666940	USA	North America	79	22.2755	5.48383	261.013	120.056	11.7175	22.4258
SRR14584270	SAMN19246775	PRJNA666940	USA	North America	75	84.5423	14.7285	1002.62	386.662	11.8594	112.044
SRR14584250	SAMN19246793	PRJNA666940	USA	North America	79	12.0908	5.30618	151.894	72.5369	12.5628	14.8181
SRR14584248	SAMN19246795	PRJNA666940	USA	North America	79	11.4546	4.67269	149.052	69.4428	13.0124	15.4589
SRR14584220	SAMN19246767	PRJNA666940	USA	North America	79	24.2125	6.02923	322.33	134.312	13.3125	28.2171
SRR14584263	SAMN19246781	PRJNA666940	USA	North America	79	21.7962	6.73628	291.064	120.312	13.3539	27.3454
SRR14584217	SAMN19246768	PRJNA666940	USA	North America	79	32.7091	8.49474	462.262	181.584	14.1325	38.3716
SRR14584243	SAMN19246800	PRJNA666940	USA	North America	38	23.8308	6.90433	340.143	153.64	14.2733	27.0157
SRR14584245	SAMN19246798	PRJNA666940	USA	North America	79	21.9833	4.63531	317.683	141.321	14.4511	32.1873
SRR14584254	SAMN19246790	PRJNA666940	USA	North America	79	20.8314	5.06332	307.428	126.447	14.7579	29.0905
SRR14584219	SAMN19246821	PRJNA666940	USA	North America	28	18.9321	4.71987	286.812	114.398	15.1495	28.6445
SRR14584266	SAMN19246779	PRJNA666940	USA	North America	77	121.007	20.0983	1858.12	546.274	15.3555	189.43
SRR14584273	SAMN19246772	PRJNA666940	USA	North America	28	121.306	21.7141	1897.48	657.011	15.6421	156.07
SRR14584259	SAMN19246785	PRJNA666940	USA	North America	28	29.118	6.84999	466.494	154.974	16.0208	34.5087
SRR14584272	SAMN19246773	PRJNA666940	USA	North America	28	66.2835	14.7667	1066.59	338.929	16.0913	101.831
SRR14584256	SAMN19246788	PRJNA666940	USA	North America	79	19.8598	5.63184	323.942	118.381	16.3115	26.2312
SRR14584251	SAMN19246792	PRJNA666940	USA	North America	28	10.0679	4.38424	165.508	64.1728	16.4391	13.6137
SRR14584271	SAMN19246774	PRJNA666940	USA	North America	38	167.439	25.8187	2777.11	1024.18	16.5858	239.503
SRR14584249	SAMN19246794	PRJNA666940	USA	North America	28	9.07227	3.25953	153.525	58.2518	16.9224	12.0607
SRR14584218	SAMN19246822	PRJNA666940	USA	North America	79	19.9154	8.17974	355.145	112.261	17.8327	27.7129
SRR14584227	SAMN19246814	PRJNA666940	USA	North America	79	37.4991	5.04496	668.711	300.422	17.8327	43.7885
SRR14584261	SAMN19246783	PRJNA666940	USA	North America	28	18.1482	7.28004	328.852	97.2194	18.1203	22.9058
SRR14584268	SAMN19246777	PRJNA666940	USA	North America	79	13.2217	4.39444	256.192	93.6518	19.3765	14.9396
SRR14584216	SAMN19246769	PRJNA666940	USA	North America	79	11.5164	3.91586	234.806	82.0775	20.3889	15.9262
SRR14584257	SAMN19246787	PRJNA666940	USA	North America	79	25.0562	7.59155	519.119	162.299	20.7182	35.5573
SRR14584265	SAMN19246780	PRJNA666940	USA	North America	79	16.0086	4.7877	334.332	122.582	20.8845	21.777
SRR14584262	SAMN19246782	PRJNA666940	USA	North America	79	57.5003	14.7331	1262.89	415.538	21.9632	96.0562
SRR14584275	SAMN19246762	PRJNA666940	USA	North America	79	43.1217	7.95798	955.786	108.41	22.1649	46.9456
SRR14584274	SAMN19246771	PRJNA666940	USA	North America	77	8.4756	3.52527	191.042	72.2091	22.5402	11.1081
SRR14584253	SAMN19246764	PRJNA666940	USA	North America	68	72.9605	11.8794	1644.99	206.115	22.5464	77.3785
SRR14584269	SAMN19246776	PRJNA666940	USA	North America	77	34.029	11.7439	786.611	242.777	23.1159	47.7422
SRR14584225	SAMN19246816	PRJNA666940	USA	North America	68	75.7807	11.6271	1800.2	397.853	23.7554	84.1921
SRR14584264	SAMN19246763	PRJNA666940	USA	North America	68	64.2273	12.655	1566.1	153.319	24.3836	71.6744
SRR14584221	SAMN19246820	PRJNA666940	USA	North America	75	43.5769	6.0946	1098.32	174.739	25.2043	53.7007
SRR14584215	SAMN19246770	PRJNA666940	USA	North America	75	7.65349	3.16292	200.934	69.8149	26.2539	11.2298
SRR14584228	SAMN19246813	PRJNA666940	USA	North America	79	34.412	4.49696	935.065	105.981	27.1727	36.9419
SRR14584237	SAMN19246805	PRJNA666940	USA	North America	78	57.4107	10.3847	1569.43	189.931	27.3369	68.0931
SRR14584226	SAMN19246815	PRJNA666940	USA	North America	79	33.21	5.38267	914.85	201.303	27.5474	44.2328
SRR14584258	SAMN19246786	PRJNA666940	USA	North America	75	12.9426	3.62995	372.458	147.728	28.7778	14.2571
SRR14584242	SAMN19246765	PRJNA666940	USA	North America	68	38.0142	6.69117	1109.45	126.48	29.185	41.1313
SRR14584234	SAMN19246808	PRJNA666940	USA	North America	79	31.0896	5.55409	946.918	147.114	30.4578	35.6061
SRR14584255	SAMN19246789	PRJNA666940	USA	North America	28	33.4787	5.68954	1021.19	111.694	30.5028	35.0865
SRR14584276	SAMN19246761	PRJNA666940	USA	North America	28	56.5547	10.2597	1727.67	230.398	30.5487	60.158
SRR14584224	SAMN19246817	PRJNA666940	USA	North America	75	39.3687	6.49954	1305.83	186.26	33.1693	50.4942
SRR14584235	SAMN19246807	PRJNA666940	USA	North America	68	37.2934	5.05114	1320.03	171.29	35.3959	40.5914
SRR14584229	SAMN19246812	PRJNA666940	United Kingdom	Europe	75	41.0012	4.26067	1496.68	170.907	36.5034	46.2231
SRR14584222	SAMN19246819	PRJNA666940	USA	North America	64	141.426	11.0054	5171.47	1258.08	36.5667	166.656
SRR14584230	SAMN19246811	PRJNA666940	United Kingdom	Europe	30	40.2934	4.11693	1526.18	326.171	37.8767	46.7765
SRR14584236	SAMN19246806	PRJNA666940	USA	North America	68	32.63	6.65174	1269.53	150.785	38.9067	39.0222
SRR14584232	SAMN19246810	PRJNA666940	USA	North America	68	40.4558	7.89813	1719.75	191.856	42.5092	47.327
SRR14584233	SAMN19246809	PRJNA666940	USA	North America	28	38.26	5.55918	1771.32	122.817	46.2968	47.8984
SRR12849130	SAMN16483402	PRJNA670081	Germany	Europe	11	12.6498	3.53216	379.147	30.6867	29.9726	13.0276	doi: 10.1128/msphere.00874-21
SRR12849127	SAMN16483402	PRJNA670081	Germany	Europe	11	10.659	3.09409	327.008	31.021	30.6789	11.025
SRR12849128	SAMN16483402	PRJNA670081	Germany	Europe	11	10.4583	2.68953	340.334	30.8435	32.542	11.1883
SRR12849129	SAMN16483402	PRJNA670081	Germany	Europe	11	12.596	3.4987	431.958	36.3456	34.2932	14.0373
SRR12849134	SAMN16483401	PRJNA670081	Netherlands	Europe	39	15.2761	4.49114	732.368	157.838	47.9421	14.7982
SRR12849132	SAMN16483401	PRJNA670081	Netherlands	Europe	44	12.3842	3.34104	663.307	143.91	53.5608	12.8088
SRR12849131	SAMN16483401	PRJNA670081	Netherlands	Europe	48	12.0667	3.46827	673.423	145.593	55.8083	12.8435
SRR12849133	SAMN16483401	PRJNA670081	Netherlands	Europe	39	13.4361	3.97412	750.408	160.175	55.8503	15.1149
SRR343139	SAMN00717303	PRJNA67101	Unknown	Unknown	79	37.1464	7.76773	195.134	15.5051	5.25311	42.0747	SRA
SRR343145	SAMN00717313	PRJNA67101	Unknown	Unknown	79	37.4348	8.47886	197.758	14.0342	5.28273	44.9293
SRR343141	SAMN00717305	PRJNA67101	Unknown	Unknown	79	37.0105	6.85109	197.344	13.7986	5.33212	44.1103
SRR343138	SAMN00717302	PRJNA67101	Unknown	Unknown	79	35.9555	7.7444	194.051	16.1908	5.39697	39.8429
SRR343149	SAMN00717316	PRJNA67101	Unknown	Unknown	11	32.7542	5.19521	196.104	14.4209	5.98715	38.6849
SRR343137	SAMN00717301	PRJNA67101	Unknown	Unknown	11	31.3539	6.79618	193.939	16.4947	6.18548	37.7705
SRR343135	SAMN00717299	PRJNA67101	Unknown	Unknown	79	31.5565	7.29197	195.465	15.5295	6.19412	38.4226
SRR343134	SAMN00717298	PRJNA67101	Unknown	Unknown	79	31.0568	7.56834	193.392	17.9964	6.22704	37.3109
SRR343140	SAMN00717304	PRJNA67101	Unknown	Unknown	79	31.2403	9.40897	194.714	15.2253	6.23278	35.3478
SRR343142	SAMN00717306	PRJNA67101	Unknown	Unknown	79	31.3317	7.96628	195.636	14.9881	6.24405	37.266
SRR343136	SAMN00717300	PRJNA67101	Unknown	Unknown	79	31.2724	9.23264	198.043	14.5276	6.33283	39.5767
SRR343150	SAMN00717317	PRJNA67101	Unknown	Unknown	11	29.2804	7.93191	186.389	25.509	6.36566	32.7354
SRR343152	SAMN00717318	PRJNA67101	Unknown	Unknown	77	26.0871	5.54912	195.08	14.7078	7.47803	31.1724
SRR343143	SAMN00717307	PRJNA67101	Unknown	Unknown	79	23.5868	5.42248	192.596	17.9	8.16541	29.3705
SRR343146	SAMN00717314	PRJNA67101	Unknown	Unknown	79	18.4182	4.70436	173.782	23.1134	9.43537	19.9254
SRR617734	SAMN01815899	PRJNA67101	Unknown	Unknown	16	50.9944	6.8465	3332.62	325.049	65.3526	56.7801
SRR617733	SAMN01815898	PRJNA67101	Unknown	Unknown	10	58.2594	9.91419	1073.05	536.681	18.4185	55.9611
SRR617739	SAMN01815904	PRJNA67101	Unknown	Unknown	79	56.3002	8.07444	1121.38	402.095	19.9179	52.6418
SRR617745	SAMN01815910	PRJNA67101	Unknown	Unknown	79	55.7202	9.42193	1111.64	491.733	19.9505	50.0827
SRR617737	SAMN01815902	PRJNA67101	Unknown	Unknown	79	56.5442	11.7479	1194.97	427.646	21.1334	56.8789
SRR617720	SAMN01815885	PRJNA67101	Unknown	Unknown	79	60.895	11.9569	1292.63	602.315	21.2272	57.533
SRR617731	SAMN01815896	PRJNA67101	Unknown	Unknown	10	61.8357	9.63821	1365.67	621.087	22.0855	56.1189
SRR617724	SAMN01815889	PRJNA67101	Unknown	Unknown	79	70.5998	9.0195	1724.22	638.853	24.4225	62.8969
SRR617735	SAMN01815900	PRJNA67101	Unknown	Unknown	78	62.6788	10.833	1559.05	663.041	24.8736	65.4275
SRR617738	SAMN01815903	PRJNA67101	Unknown	Unknown	5	54.4206	10.7091	1356.29	453.746	24.9223	54.3424
SRR617722	SAMN01815887	PRJNA67101	Unknown	Unknown	79	56.2397	9.90477	1408.21	526.716	25.0394	56.8451
SRR617721	SAMN01815886	PRJNA67101	Unknown	Unknown	79	67.2273	8.35442	1704.68	728.997	25.357	68.8173
SRR617740	SAMN01815905	PRJNA67101	Unknown	Unknown	79	46.769	6.96174	1248.89	472.188	26.7033	43.2016
SRR617742	SAMN01815907	PRJNA67101	Unknown	Unknown	79	55.7455	8.2338	1611.43	635.868	28.9069	55.5625
SRR617732	SAMN01815897	PRJNA67101	Unknown	Unknown	79	58.7424	9.92897	1745.9	326.437	29.7213	54.9874
SRR617736	SAMN01815901	PRJNA67101	Unknown	Unknown	11	41.1359	8.80387	1389.09	356.538	33.7683	41.1265
SRR617744	SAMN01815909	PRJNA67101	Unknown	Unknown	38	251.738	30.489	8538.91	1900.15	33.9198	261.436
SRR617727	SAMN01815892	PRJNA67101	Unknown	Unknown	11	65.8116	9.19926	2249.3	727.072	34.1779	66.6578
SRR617741	SAMN01815906	PRJNA67101	Unknown	Unknown	4	72.9753	10.978	2524.09	703.547	34.5883	74.1084
SRR617725	SAMN01815890	PRJNA67101	Unknown	Unknown	4	52.5676	12.1989	1966.86	527.552	37.4157	57.81
SRR617743	SAMN01815908	PRJNA67101	Unknown	Unknown	78	14.8085	4.45806	568.475	184.443	38.3883	17.2558
SRR617729	SAMN01815894	PRJNA67101	Unknown	Unknown	75	69.0494	10.6306	2676.14	762.927	38.7569	68.6677
SRR617723	SAMN01815888	PRJNA67101	Unknown	Unknown	11	44.7993	8.13422	2086.01	463.349	46.5636	44.6389
SRR617730	SAMN01815895	PRJNA67101	Unknown	Unknown	11	37.4101	6.3424	1752.03	421.035	46.8329	43.9691
SRR617728	SAMN01815893	PRJNA67101	Unknown	Unknown	11	42.7548	7.99937	2049.39	468.968	47.9335	41.1671
SRR617726	SAMN01815891	PRJNA67101	Unknown	Unknown	11	47.8604	7.99066	2560.09	600.721	53.4908	46.8769
SRR12894196	SAMN16550819	PRJNA671765	Canada	North America	68	82.3471	11.5112	2397.76	284.938	29.1177	83.9218	https://doi.org/10.3390/microorganisms8111673
SRR12894201	SAMN16550824	PRJNA671765	Ireland	Europe	79	82.9148	12.9402	2424.96	291.712	29.2465	92.6683
SRR12894193	SAMN16550822	PRJNA671765	Canada	North America	79	74.2149	10.0949	2376.51	308.907	32.022	81.6935
SRR12894197	SAMN16550818	PRJNA671765	Canada	North America	79	81.3601	11.0684	2746.9	334.855	33.7622	85.172
SRR12894195	SAMN16550820	PRJNA671765	Canada	North America	79	66.9531	9.40486	2771.31	322.827	41.3918	83.045
SRR12894200	SAMN16550815	PRJNA671765	Canada	North America	68	71.5059	9.67183	3036.38	371.139	42.4634	83.3269
SRR12894202	SAMN16550823	PRJNA671765	USA	North America	77	67.8271	13.7542	3172.55	378.329	46.774	87.3649
SRR12894199	SAMN16550816	PRJNA671765	Canada	North America	22	66.6578	11.2047	3347.66	720.056	50.2216	85.3749
SRR12894203	SAMN16550814	PRJNA671765	Canada	North America	11	81.2298	12.1927	4426.6	411.009	54.4947	100.509
SRR12894198	SAMN16550817	PRJNA671765	Canada	North America	75	64.979	12.9668	3719.01	454.851	57.234	78.5578
SRR12894194	SAMN16550821	PRJNA671765	Canada	North America	79	71.8839	13.081	4312.48	489.159	59.9924	81.9656
SRR12894204	SAMN16550813	PRJNA671765	Canada	North America	38	62.6016	9.60332	3815.38	448.432	60.9471	84.092
SRR12949928	SAMN16591179	PRJNA673120	Germany	Europe	75	158.226	14.2316	1011.5	992.503	6.39277	188.882	https://doi.org/10.1128/spectrum.00010-21
SRR12949927	SAMN16591190	PRJNA673120	Germany	Europe	11	159.435	17.821	1183.82	797.716	7.42509	199.998
SRR12949929	SAMN16591136	PRJNA673120	Germany	Europe	77	146.34	20.6869	1340	1182.98	9.1568	173.832
SRR12949926	SAMN16591200	PRJNA673120	Germany	Europe	5	141.588	13.2368	1594.5	1192.23	11.2616	178.577
SRR13127877	SAMN16885724	PRJNA680589	Unknown	Unknown	11	15.3842	4.44879	536.253	44.2017	34.8574	16.5502	doi: 10.1128/msphere.00874-21
SRR13127878	SAMN16885724	PRJNA680589	Unknown	Unknown	11	14.2224	3.01827	518.58	44.125	36.4623	16.1581
SRR13127875	SAMN16885724	PRJNA680589	Unknown	Unknown	11	12.882	2.74261	475.256	42.2029	36.8929	14.1846
SRR13127876	SAMN16885724	PRJNA680589	Unknown	Unknown	11	11.4002	2.57167	479.595	41.5958	42.0689	14.1673
SRR13127883	SAMN16885723	PRJNA680589	Unknown	Unknown	11	15.7437	3.57583	668.496	65.0608	42.4612	15.5738
SRR13127874	SAMN16885725	PRJNA680589	Unknown	Unknown	39	12.9234	2.76238	584.252	115.416	45.2088	13.3386
SRR13127884	SAMN16885723	PRJNA680589	Unknown	Unknown	11	14.2749	4.33891	647.762	58.4387	45.3778	15.2324
SRR13127879	SAMN16885723	PRJNA680589	Unknown	Unknown	11	12.8993	3.67538	595.293	58.7017	46.1492	13.3123
SRR13127873	SAMN16885725	PRJNA680589	Unknown	Unknown	48	12.5775	3.11234	595.367	117.522	47.3358	13.6188
SRR13127882	SAMN16885725	PRJNA680589	Unknown	Unknown	42	9.39963	3.41436	525.487	105.467	55.9051	11.5487
SRR13127880	SAMN16885723	PRJNA680589	Unknown	Unknown	11	9.32551	4.06814	598.374	58.3568	64.1653	13.2809
SRR13127881	SAMN16885725	PRJNA680589	Unknown	Unknown	40	8.1013	2.46375	531.26	106.838	65.5771	11.5926
SRR13579458	SAMN17674013	PRJNA697844	Germany	Europe	79	31.449	8.60867	15.0918	15.163	0.47988	32.341	https://doi.org/10.1038/s41564-021-00993-x
SRR13579423	SAMN17673963	PRJNA697844	Germany	Europe	75	31.3385	8.81174	22.1799	27.9149	0.707752	27.1668
SRR13579431	SAMN17673955	PRJNA697844	Germany	Europe	4	57.1519	10.4595	57.5299	63.9755	1.00661	54.1612
SRR13579407	SAMN17673977	PRJNA697844	Germany	Europe	77	85.6726	16.2171	92.547	80.3125	1.08024	87.3793
SRR13579433	SAMN17673954	PRJNA697844	Germany	Europe	79	47.2841	6.17119	54.1537	78.0704	1.14528	45.9044
SRR13579424	SAMN17673962	PRJNA697844	Germany	Europe	79	45.79	9.29587	62.9683	92.0471	1.37515	43.1553
SRR13579439	SAMN17673948	PRJNA697844	Germany	Europe	11	51.4441	6.72595	71.3614	71.6669	1.38716	51.4737
SRR13579297	SAMN17673928	PRJNA697844	Germany	Europe	76	22.8555	5.06681	41.6365	23.4999	1.82173	20.0134
SRR13579435	SAMN17673952	PRJNA697844	Germany	Europe	16	30.9673	7.62961	57.4238	49.8687	1.85434	33.1375
SRR13579413	SAMN17673972	PRJNA697844	Germany	Europe	79	76.4305	8.99969	149.712	204.025	1.9588	67.3264
SRR13579434	SAMN17673953	PRJNA697844	Germany	Europe	79	49.5812	6.11742	97.3656	148.85	1.96376	43.1237
SRR13579415	SAMN17673970	PRJNA697844	Germany	Europe	75	18.9568	5.29016	38.958	28.5927	2.0551	21.8203
SRR13579418	SAMN17673967	PRJNA697844	Germany	Europe	79	32.1748	8.56292	68.1947	94.3619	2.11951	32.197
SRR13579440	SAMN17673947	PRJNA697844	Germany	Europe	79	41.5862	10.021	89.2269	73.8706	2.14559	40.3397
SRR13579416	SAMN17673969	PRJNA697844	Germany	Europe	58	22.5726	5.139	51.7728	48.9534	2.29361	24.4378
SRR13579426	SAMN17673960	PRJNA697844	Germany	Europe	79	27.5899	7.17862	64.1235	57.0172	2.32417	28.2335
SRR13579455	SAMN17674015	PRJNA697844	Germany	Europe	4	26.9759	5.36919	63.4228	45.9254	2.35109	27.1232
SRR13579447	SAMN17674023	PRJNA697844	Germany	Europe	79	14.218	3.85026	33.7056	11.8973	2.37062	27.9549
SRR13579401	SAMN17673983	PRJNA697844	Germany	Europe	75	33.2613	7.17538	80.3501	78.138	2.41573	31.6277
SRR13579441	SAMN17673946	PRJNA697844	Germany	Europe	77	56.2668	10.9179	146.515	130.623	2.60394	57.0242
SRR13579427	SAMN17673959	PRJNA697844	Germany	Europe	76	21.1075	5.77361	55.3204	42.8698	2.62089	18.8042
SRR13579406	SAMN17673978	PRJNA697844	Germany	Europe	79	35.8376	5.91797	94.5009	110.575	2.63692	32.8778
SRR13579289	SAMN17673935	PRJNA697844	Germany	Europe	79	36.4595	8.2573	105.81	51.5498	2.90212	36.544
SRR13579405	SAMN17673979	PRJNA697844	Germany	Europe	79	58.1742	9.07689	172.303	125.995	2.96185	66.3512
SRR13579404	SAMN17673980	PRJNA697844	Germany	Europe	77	64.0525	9.92975	211.434	270.426	3.30094	60.9035
SRR13579402	SAMN17673982	PRJNA697844	Germany	Europe	16	19.9327	5.83327	68.5285	49.0292	3.438	25.6026
SRR13579291	SAMN17673934	PRJNA697844	Germany	Europe	75	32.0037	6.91865	110.673	42.2795	3.45814	34.6519
SRR13579430	SAMN17673956	PRJNA697844	Germany	Europe	75	36.2742	8.47487	132.856	136.632	3.66255	31.6761
SRR13579410	SAMN17673912	PRJNA697844	Germany	Europe	79	84.5683	9.88866	314.11	236.732	3.71428	84.0733
SRR13579417	SAMN17673968	PRJNA697844	Germany	Europe	11	44.433	7.71733	168.067	190.667	3.78248	41.4054
SRR13579365	SAMN17673994	PRJNA697844	Germany	Europe	38	39.181	6.87555	149.541	49.4109	3.81667	50.025
SRR13579293	SAMN17673932	PRJNA697844	Germany	Europe	75	21.3447	3.50205	81.8843	24.5046	3.83629	22.8688
SRR13579283	SAMN17673941	PRJNA697844	Germany	Europe	11	38.1649	6.79012	146.872	69.8814	3.84836	37.8367
SRR13579356	SAMN17674002	PRJNA697844	Germany	Europe	77	17.2798	5.16347	66.8465	18.4544	3.86847	20.9036
SRR13579464	SAMN17674007	PRJNA697844	Germany	Europe	75	20.6609	4.86993	80.9958	48.567	3.92024	25.6144
SRR13579437	SAMN17673950	PRJNA697844	Germany	Europe	11	52.1365	13.1133	204.871	226.758	3.92951	47.9015
SRR13579409	SAMN17673975	PRJNA697844	Germany	Europe	11	23.2292	4.24264	98.5166	72.385	4.24107	31.1606
SRR13579380	SAMN17674040	PRJNA697844	Germany	Europe	54	20.6337	6.27697	88.0476	42.615	4.26717	22.2527
SRR13579442	SAMN17673945	PRJNA697844	Germany	Europe	78	39.0519	5.44756	168.575	112.898	4.31668	35.49
SRR13579462	SAMN17674009	PRJNA697844	Germany	Europe	79	27.6955	5.86503	122.524	67.7967	4.42397	26.7399
SRR13579371	SAMN17673988	PRJNA697844	Germany	Europe	79	242.429	29.2999	1139.27	838.133	4.69941	228.465
SRR13579453	SAMN17674017	PRJNA697844	Germany	Europe	11	25.0649	5.75221	118.04	62.0161	4.70938	26.5712
SRR13579298	SAMN17673927	PRJNA697844	Germany	Europe	75	18.6238	4.81807	88.1227	45.86	4.73171	18.1732
SRR13579364	SAMN17673914	PRJNA697844	Germany	Europe	77	41.2322	5.32879	200.853	103.294	4.87125	48.288
SRR13579282	SAMN17673942	PRJNA697844	Germany	Europe	61	38.609	7.57344	188.29	65.5745	4.87685	34.0465
SRR13579295	SAMN17673930	PRJNA697844	Germany	Europe	79	45.1915	10.2297	224.049	71.2321	4.95777	40.3825
SRR13579422	SAMN17673964	PRJNA697844	Germany	Europe	75	40.2829	9.69231	201.499	203.116	5.00209	40.7791
SRR13579286	SAMN17673938	PRJNA697844	Germany	Europe	11	34.8178	7.14451	174.429	67.7668	5.00976	35.9459
SRR13579296	SAMN17673929	PRJNA697844	Germany	Europe	78	40.1526	12.2515	201.829	64.5963	5.02656	38.9315
SRR13579419	SAMN17673966	PRJNA697844	Germany	Europe	79	20.6912	8.42019	104.235	81.4487	5.03766	21.3386
SRR13579302	SAMN17673924	PRJNA697844	Germany	Europe	79	22.538	5.71687	113.684	50.6883	5.04409	24.3459
SRR13579392	SAMN17674029	PRJNA697844	Germany	Europe	75	16.6436	5.82105	89.0187	58.4056	5.34852	15.3763
SRR13579420	SAMN17673965	PRJNA697844	Germany	Europe	79	36.0828	9.97682	194.016	154.512	5.37698	35.5543
SRR13579391	SAMN17674030	PRJNA697844	Germany	Europe	79	37.383	8.50131	201.346	79.0093	5.38603	32.2093
SRR13579425	SAMN17673961	PRJNA697844	Germany	Europe	77	23.5528	7.10804	129.584	93.8469	5.50187	22.2261
SRR13579284	SAMN17673940	PRJNA697844	Germany	Europe	5	28.7566	5.81907	160.389	54.0786	5.57746	30.1161
SRR13579436	SAMN17673951	PRJNA697844	Germany	Europe	16	25.0142	6.77206	140.072	108.595	5.59968	26.0931
SRR13579429	SAMN17673957	PRJNA697844	Germany	Europe	16	49.3119	11.9385	280.652	327.801	5.69136	46.9628
SRR13579344	SAMN17673920	PRJNA697844	Germany	Europe	79	29.0599	5.99078	167.259	110.694	5.75566	28.1849
SRR13579367	SAMN17673992	PRJNA697844	Germany	Europe	79	55.3274	7.00602	322.253	200.038	5.82448	54.2751
SRR13579414	SAMN17673971	PRJNA697844	Germany	Europe	16	73.748	13.0829	430.791	379.857	5.84139	71.2264
SRR13579465	SAMN17674006	PRJNA697844	Germany	Europe	77	68.2205	10.6545	405.679	206.72	5.94659	73.8711
SRR13579360	SAMN17673998	PRJNA697844	Germany	Europe	16	58.1093	10.4847	347.504	108.459	5.98018	63.1463
SRR13579333	SAMN17673921	PRJNA697844	Germany	Europe	53	16.2755	3.19853	103.035	51.3962	6.33071	14.8691
SRR13579452	SAMN17674018	PRJNA697844	Germany	Europe	75	19.9969	6.10057	127.913	76.0466	6.39665	19.3031
SRR13579311	SAMN17673923	PRJNA697844	Germany	Europe	4	23.971	6.12386	153.544	46.827	6.40542	24.8442
SRR13579362	SAMN17673996	PRJNA697844	Germany	Europe	75	28.3885	4.90091	183.312	117.773	6.45726	24.7558
SRR13579285	SAMN17673939	PRJNA697844	Germany	Europe	79	17.5361	5.16936	114.385	46.6414	6.52281	19.55
SRR13579454	SAMN17674016	PRJNA697844	Germany	Europe	77	28.5392	5.55956	188.139	46.3209	6.59229	50.9249
SRR13579292	SAMN17673933	PRJNA697844	Germany	Europe	78	31.1285	4.59841	209.687	68.7837	6.73618	29.5036
SRR13579444	SAMN17673944	PRJNA697844	Germany	Europe	16	36.0828	8.8559	246.652	135.225	6.83573	33.3706
SRR13579398	SAMN17673985	PRJNA697844	Germany	Europe	77	37.7659	6.44978	258.62	122.202	6.84799	39.7922
SRR13579358	SAMN17674000	PRJNA697844	Germany	Europe	79	26.0346	6.60028	179.779	48.6796	6.9054	28.2733
SRR13579421	SAMN17673911	PRJNA697844	Germany	Europe	77	56.6535	7.04561	400.369	139.103	7.06698	59.2367
SRR13579389	SAMN17674032	PRJNA697844	Germany	Europe	75	20.0791	3.85939	142.611	48.4413	7.10249	19.0486
SRR13579287	SAMN17673937	PRJNA697844	Germany	Europe	78	68.1044	12.642	485.343	327.919	7.12645	60.2329
SRR13579408	SAMN17673976	PRJNA697844	Germany	Europe	76	41.8289	6.83035	299.394	222.362	7.15758	54.6837
SRR13579411	SAMN17673974	PRJNA697844	Germany	Europe	11	20.9296	3.96975	149.956	108.428	7.16477	31.0128
SRR13579400	SAMN17673984	PRJNA697844	Germany	Europe	11	97.7795	14.4274	710.204	489.638	7.26332	100.761
SRR13579300	SAMN17673925	PRJNA697844	Germany	Europe	75	38.5973	8.14036	282.652	120.679	7.3231	39.1634
SRR13579288	SAMN17673936	PRJNA697844	Germany	Europe	11	31.7103	5.72738	233.868	65.4785	7.37514	33.771
SRR13579294	SAMN17673931	PRJNA697844	Germany	Europe	75	46.3403	10.3341	344.454	88.5602	7.43314	41.2039
SRR13579388	SAMN17674033	PRJNA697844	Germany	Europe	75	26.6078	6.76554	198.953	77.6677	7.47726	23.8453
SRR13579399	SAMN17673913	PRJNA697844	Germany	Europe	11	24.1377	4.08276	181.144	117.498	7.50459	24.7234
SRR13579432	SAMN17673910	PRJNA697844	Germany	Europe	79	42.8246	5.9832	322.468	147.158	7.52997	43.2575
SRR13579366	SAMN17673993	PRJNA697844	Germany	Europe	79	51.4188	6.7511	388.217	212.439	7.5501	54.3194
SRR13579393	SAMN17674028	PRJNA697844	Germany	Europe	79	27.5998	5.53998	209.059	81.1953	7.57467	27.6474
SRR13579460	SAMN17674011	PRJNA697844	Germany	Europe	79	26.0167	5.0125	198.513	45.496	7.63023	50.799
SRR13579373	SAMN17673986	PRJNA697844	Germany	Europe	77	24.5763	7.37581	190.766	74.3977	7.76219	29.4584
SRR13579443	SAMN17673909	PRJNA697844	Germany	Europe	79	34.559	7.04835	269.638	117.182	7.80226	35.6843
SRR13579463	SAMN17674008	PRJNA697844	Germany	Europe	15	74.8394	9.54691	585.525	174.86	7.82375	147.662
SRR13579385	SAMN17674035	PRJNA697844	Germany	Europe	79	18.0797	4.90003	141.49	62.161	7.82592	18.1926
SRR13579390	SAMN17674031	PRJNA697844	Germany	Europe	5	25.6658	4.70924	204.845	68.3523	7.98125	22.6615
SRR13579461	SAMN17674010	PRJNA697844	Germany	Europe	79	15.8493	3.98539	128.137	31.6678	8.0847	34.899
SRR13579357	SAMN17674001	PRJNA697844	Germany	Europe	11	26.8573	7.43252	217.373	63.3402	8.0936	33.6981
SRR13579403	SAMN17673981	PRJNA697844	Germany	Europe	75	13.7097	4.16973	113.3	74.5073	8.2642	16.4736
SRR13579467	SAMN17673915	PRJNA697844	Germany	Europe	79	31.2477	5.47134	260.307	83.3964	8.33045	28.554
SRR13579372	SAMN17673987	PRJNA697844	Germany	Europe	77	47.5182	8.29069	396.313	193.216	8.34023	43.8152
SRR13579397	SAMN17673917	PRJNA697844	Germany	Europe	16	27.1767	5.66043	227.749	53.0204	8.38032	26.8052
SRR13579343	SAMN17674055	PRJNA697844	Germany	Europe	77	53.924	11.6731	465.358	437.181	8.62989	62.7279
SRR13579370	SAMN17673989	PRJNA697844	Germany	Europe	79	45.8888	6.27649	407.414	127.826	8.87829	54.0578
SRR13579459	SAMN17674012	PRJNA697844	Germany	Europe	79	24.0247	5.5586	214.143	111.109	8.91346	27.9526
SRR13579412	SAMN17673973	PRJNA697844	Germany	Europe	79	11.3817	2.95539	101.747	66.5583	8.93948	15.9122
SRR13579450	SAMN17674020	PRJNA697844	Germany	Europe	60	74.8474	7.75949	673.638	198.227	9.00015	149.604
SRR13579354	SAMN17674004	PRJNA697844	Germany	Europe	11	14.0401	4.64077	128.317	24.4859	9.13931	19.1312
SRR13579355	SAMN17674003	PRJNA697844	Germany	Europe	79	20.2687	3.91	185.711	53.8943	9.16247	24.5059
SRR13579353	SAMN17674046	PRJNA697844	Germany	Europe	75	61.7566	8.03031	580.853	135.452	9.40551	72.4911
SRR13579456	SAMN17673916	PRJNA697844	Germany	Europe	79	34.3459	9.80579	329.127	76.739	9.58272	28.8352
SRR13579363	SAMN17673995	PRJNA697844	Germany	Europe	79	27.2298	7.94412	262.509	57.3567	9.64053	27.5225
SRR13579379	SAMN17674041	PRJNA697844	Germany	Europe	11	21.0253	6.55461	203.109	72.531	9.66023	21.8228
SRR13579299	SAMN17673926	PRJNA697844	Germany	Europe	5	33.7041	8.04466	327.411	103.924	9.71427	36.5895
SRR13579334	SAMN17674064	PRJNA697844	Germany	Europe	79	70.4978	12.3043	701.638	97.6112	9.95262	71.1315
SRR13579396	SAMN17674025	PRJNA697844	Germany	Europe	79	25.1896	5.43888	255.266	51.641	10.1338	21.3541
SRR13579375	SAMN17673919	PRJNA697844	Germany	Europe	75	37.5633	8.17615	384.435	119.676	10.2343	38.606
SRR13579445	SAMN17673943	PRJNA697844	Germany	Europe	77	30.9185	8.67684	338.973	187.321	10.9635	33.3687
SRR13579449	SAMN17674021	PRJNA697844	Germany	Europe	11	64.2378	12.899	715.475	205.818	11.1379	61.036
SRR13579368	SAMN17673991	PRJNA697844	Germany	Europe	77	30.1606	5.53281	337.711	74.1012	11.1971	33.3651
SRR13579428	SAMN17673958	PRJNA697844	Germany	Europe	78	28.4929	6.04539	330.464	134.897	11.5981	29.646
SRR13579446	SAMN17674024	PRJNA697844	Germany	Europe	79	17.4466	4.38929	203.829	56.0975	11.683	20.7179
SRR13579386	SAMN17673918	PRJNA697844	Germany	Europe	11	33.798	8.95673	413.518	89.6164	12.235	33.3726
SRR13579324	SAMN17674073	PRJNA697844	Germany	Europe	79	59.5164	7.681	752.601	762.845	12.6453	63.0144
SRR13579361	SAMN17673997	PRJNA697844	Germany	Europe	78	17.6498	6.66042	223.992	52.7937	12.6909	18.9973
SRR13579322	SAMN17673922	PRJNA697844	Germany	Europe	77	36.8845	7.48329	479.784	133.18	13.0077	37.643
SRR13579307	SAMN17674088	PRJNA697844	Germany	Europe	38	63.3762	11.1001	864.256	115.519	13.6369	73.9204
SRR13579466	SAMN17674005	PRJNA697844	Germany	Europe	75	38.3965	7.22649	526.128	140.834	13.7025	47.8988
SRR13579395	SAMN17674026	PRJNA697844	Germany	Europe	79	52.16	6.55506	717.185	181.653	13.7497	59.3824
SRR13579315	SAMN17674081	PRJNA697844	Germany	Europe	79	62.8425	10.1635	865.106	262.223	13.7663	64.2281
SRR13579468	SAMN17673906	PRJNA697844	Germany	Europe	78	37.6072	4.94607	543.366	138.068	14.4485	42.1991
SRR13579457	SAMN17674014	PRJNA697844	Germany	Europe	79	34.3996	5.80537	509.124	120.562	14.8003	74.7086
SRR13579377	SAMN17674043	PRJNA697844	Germany	Europe	79	32.4546	5.67482	497.097	256.17	15.3167	33.4157
SRR13579438	SAMN17673949	PRJNA697844	Germany	Europe	79	35.4719	7.01048	552.798	248.897	15.5841	33.932
SRR13579345	SAMN17674054	PRJNA697844	Germany	Europe	11	60.4021	8.00893	960.334	497.175	15.899	65.9336
SRR13579376	SAMN17674044	PRJNA697844	Germany	Europe	75	60.0204	7.98849	969.72	176.518	16.1565	74.2774
SRR13579451	SAMN17674019	PRJNA697844	Germany	Europe	78	37.6362	7.65417	646.142	81.7755	17.1681	84.8154
SRR13579290	SAMN17673908	PRJNA697844	Germany	Europe	79	33.5818	5.12814	580.054	220.976	17.2729	33.1988
SRR13579301	SAMN17673907	PRJNA697844	Germany	Europe	77	28.1235	5.25019	496.482	196.896	17.6536	34.5803
SRR13579384	SAMN17674036	PRJNA697844	Germany	Europe	54	17.5405	4.70621	355.488	109.595	20.2667	34.1548
SRR13579469	SAMN17673905	PRJNA697844	Germany	Europe	11	51.8944	9.26805	1081.22	236.541	20.835	60.1108
SRR13579383	SAMN17674037	PRJNA697844	Germany	Europe	78	43.2742	5.921	917.15	143.312	21.1939	44.3822
SRR13579394	SAMN17674027	PRJNA697844	Germany	Europe	75	36.2156	5.73357	780.309	312.966	21.5462	36.0368
SRR13579309	SAMN17674086	PRJNA697844	Germany	Europe	11	60.0432	8.52209	1324.57	131.305	22.0603	70.4888
SRR13579351	SAMN17674048	PRJNA697844	Germany	Europe	77	51.2495	8.26744	1157.18	614.58	22.5794	62.6228
SRR13579378	SAMN17674042	PRJNA697844	Germany	Europe	75	50.2366	8.48238	1135.71	197.416	22.6073	54.3378
SRR13579382	SAMN17674038	PRJNA697844	Germany	Europe	11	52.4194	8.06503	1192.81	217.432	22.7551	59.802
SRR13579352	SAMN17674047	PRJNA697844	Germany	Europe	10	62.3064	9.15328	1454.24	664.513	23.3402	73.3383
SRR13579332	SAMN17674065	PRJNA697844	Germany	Europe	79	53.7733	7.50294	1261.5	122.7	23.4595	60.7217
SRR13579387	SAMN17674034	PRJNA697844	Germany	Europe	79	26.5368	4.96866	625.382	179.521	23.5666	27.8819
SRR13579381	SAMN17674039	PRJNA697844	Germany	Europe	38	23.1347	4.55109	548.075	169.267	23.6907	25.2315
SRR13579350	SAMN17674049	PRJNA697844	Germany	Europe	77	55.7288	6.02354	1326.9	687.429	23.81	67.3782
SRR13579369	SAMN17673990	PRJNA697844	Germany	Europe	11	25.1118	5.23152	608.707	164.07	24.2399	27.9171
SRR13579448	SAMN17674022	PRJNA697844	Germany	Europe	38	51.1729	8.06232	1242.29	632.862	24.2764	53.4024
SRR13579340	SAMN17674058	PRJNA697844	Germany	Europe	73	62.958	8.15309	1591.2	229.99	25.274	69.876
SRR13579374	SAMN17674045	PRJNA697844	Germany	Europe	16	54.5911	11.3692	1390.43	131.034	25.4699	70.761
SRR13579330	SAMN17674067	PRJNA697844	Germany	Europe	79	60.3706	8.25676	1551.72	539.182	25.7033	72.0406
SRR13579341	SAMN17674057	PRJNA697844	Germany	Europe	77	61.2804	9.21105	1576.52	235.523	25.7263	70.1133
SRR13579347	SAMN17674052	PRJNA697844	Germany	Europe	79	55.1797	7.4038	1484.94	114.152	26.911	70.6936
SRR13579346	SAMN17674053	PRJNA697844	Germany	Europe	1	60.4713	12.5328	1644.19	337.751	27.1896	69.7855
SRR13579310	SAMN17674085	PRJNA697844	Germany	Europe	76	61.9246	8.168	1705.95	148.575	27.5487	74.6838
SRR13579348	SAMN17674051	PRJNA697844	Germany	Europe	10	62.4966	8.3808	1734.9	178.593	27.76	68.1298
SRR13579342	SAMN17674056	PRJNA697844	Germany	Europe	77	53.3743	10.4744	1540.9	495.8	28.8697	62.2671
SRR13579304	SAMN17674091	PRJNA697844	Germany	Europe	77	61.8802	10.8524	1842.9	195.715	29.7818	67.6434
SRR13579329	SAMN17674068	PRJNA697844	Germany	Europe	77	56.7573	7.73062	1727.61	310.289	30.4387	67.1791
SRR13579359	SAMN17673999	PRJNA697844	Germany	Europe	38	28.6973	7.15793	913.256	239.471	31.8237	29.4947
SRR13579305	SAMN17674090	PRJNA697844	Germany	Europe	11	63.8413	10.6428	2056.26	330.854	32.2089	76.5859
SRR13579317	SAMN17674079	PRJNA697844	Germany	Europe	55	146.164	16.7081	4711.03	939.128	32.2312	154.882
SRR13579319	SAMN17674077	PRJNA697844	Germany	Europe	5	50.8264	6.84998	1644.47	105.684	32.3547	67.5637
SRR13579303	SAMN17674092	PRJNA697844	Germany	Europe	75	53.3959	8.41966	1780.43	281.095	33.344	65.87
SRR13579336	SAMN17674062	PRJNA697844	Germany	Europe	75	69.05	10.2982	2391.79	781.096	34.6386	81.4195
SRR13579321	SAMN17674075	PRJNA697844	Germany	Europe	10	51.5374	9.25756	1800.34	276.093	34.9327	71.7982
SRR13579323	SAMN17674074	PRJNA697844	Germany	Europe	64	56.3372	9.83378	1985.71	338.476	35.2468	65.9456
SRR13579306	SAMN17674089	PRJNA697844	Germany	Europe	79	60.3255	11.2225	2151.13	305.848	35.6587	71.8011
SRR13579312	SAMN17674084	PRJNA697844	Germany	Europe	64	59.2384	11.8703	2143.63	130.738	36.1865	70.2714
SRR13579339	SAMN17674059	PRJNA697844	Germany	Europe	11	59.399	6.65224	2183.35	211.02	36.7574	73.1151
SRR13579327	SAMN17674070	PRJNA697844	Germany	Europe	11	60.5411	11.4507	2241.63	188.928	37.0266	71.6183
SRR13579328	SAMN17674069	PRJNA697844	Germany	Europe	11	59.4188	9.08482	2203.1	169.1	37.0775	67.2133
SRR13579308	SAMN17674087	PRJNA697844	Germany	Europe	77	57.706	8.43246	2253.02	165.34	39.043	71.6297
SRR13579335	SAMN17674063	PRJNA697844	Germany	Europe	11	55.2014	7.13867	2180.29	183.07	39.497	69.4349
SRR13579314	SAMN17674082	PRJNA697844	Germany	Europe	76	52.4077	8.01	2135.44	144.518	40.7467	64.0866
SRR13579337	SAMN17674061	PRJNA697844	Germany	Europe	79	57.2773	11.4494	2343.41	239.378	40.9134	68.52
SRR13579349	SAMN17674050	PRJNA697844	Germany	Europe	68	55.3545	7.40796	2315.49	335.958	41.8301	72.3815
SRR13579338	SAMN17674060	PRJNA697844	Germany	Europe	77	49.4639	7.80845	2159.45	149.509	43.6571	65.1547
SRR13579326	SAMN17674071	PRJNA697844	Germany	Europe	77	55.7832	8.34644	2562.85	159.48	45.943	69.8742
SRR13579331	SAMN17674066	PRJNA697844	Germany	Europe	28	53.7678	11.0575	2671.86	245.412	49.6927	65.1375
SRR13579316	SAMN17674080	PRJNA697844	Germany	Europe	16	53.3743	6.08242	2664.16	218.036	49.9146	63.4356
SRR13579313	SAMN17674083	PRJNA697844	Germany	Europe	2	58.5559	8.71757	2924.48	177.31	49.9433	67.4709
SRR13579318	SAMN17674078	PRJNA697844	Germany	Europe	79	53.9592	7.45325	2827.86	209.797	52.4074	68.1771
SRR13579325	SAMN17674072	PRJNA697844	Germany	Europe	77	48.7832	9.12809	2561.55	162.453	52.5088	60.8646
SRR13579320	SAMN17674076	PRJNA697844	Germany	Europe	71	48.3681	8.56671	2586.01	477.579	53.4651	62.3166
SRR14364163	SAMN18927137	PRJNA726267	New Zealand	Oceana	79	60.7418	12.0069	579.037	82.88	9.53277	60.2484	doi: 10.1016/j.isci.2022.105470
SRR14364151	SAMN18927148	PRJNA726267	New Zealand	Oceana	4	61.223	10.1793	874.251	116.949	14.2798	59.7842
SRR14364152	SAMN18927147	PRJNA726267	New Zealand	Oceana	68	49.6232	7.0688	781.694	91.9494	15.7526	48.7071
SRR14364162	SAMN18927138	PRJNA726267	New Zealand	Oceana	79	52.6584	6.22984	834.187	108.29	15.8415	52.807
SRR14364153	SAMN18927146	PRJNA726267	New Zealand	Oceana	11	49.6393	7.72197	788.472	87.1329	15.884	46.8177
SRR14364143	SAMN18927135	PRJNA726267	New Zealand	Oceana	4	64.3119	7.78621	1044.34	99.8554	16.2387	58.8833
SRR14364161	SAMN18927139	PRJNA726267	New Zealand	Oceana	11	55.9802	10.2072	913.589	111.38	16.3198	55.7898
SRR14364164	SAMN18927136	PRJNA726267	New Zealand	Oceana	17	46.7406	9.59588	765.981	423.487	16.3879	53.4786
SRR14364144	SAMN18927134	PRJNA726267	New Zealand	Oceana	4	48.0136	5.53368	788.516	87.6147	16.4228	48.7502
SRR14364155	SAMN18927145	PRJNA726267	New Zealand	Oceana	11	51.1365	9.51879	888.204	100.689	17.3693	49.5071
SRR14364145	SAMN18927133	PRJNA726267	New Zealand	Oceana	11	48.6677	6.64597	877.937	109.458	18.0394	52.1827
SRR14364150	SAMN18927149	PRJNA726267	New Zealand	Oceana	79	51.0296	9.70691	920.709	166.365	18.0426	52.7799
SRR14364166	SAMN18927126	PRJNA726267	New Zealand	Oceana	11	52.0074	9.90617	947.121	134.206	18.2113	56.0485
SRR14364165	SAMN18927127	PRJNA726267	New Zealand	Oceana	11	46.9049	12.6214	855.554	152.503	18.2402	47.4818
SRR14364160	SAMN18927140	PRJNA726267	New Zealand	Oceana	11	56.6152	11.6777	1046.38	113.287	18.4823	55.3829
SRR14364159	SAMN18927141	PRJNA726267	New Zealand	Oceana	11	55.0037	7.78623	1054.36	114.511	19.1689	54.5722
SRR14364157	SAMN18927143	PRJNA726267	New Zealand	Oceana	11	48.4503	7.42497	931.776	105.436	19.2316	50.0477
SRR14364158	SAMN18927142	PRJNA726267	New Zealand	Oceana	11	55.706	6.98356	1147.59	126.305	20.6008	56.3948
SRR14364156	SAMN18927144	PRJNA726267	New Zealand	Oceana	11	52.9753	7.31006	1100.13	127.779	20.7668	51.0409
SRR14364148	SAMN18927130	PRJNA726267	New Zealand	Oceana	11	51.5398	8.85902	2193	278.555	42.5495	58.4015
SRR14364147	SAMN18927131	PRJNA726267	New Zealand	Oceana	11	47.7752	9.47563	2085.29	266.004	43.6479	49.762
SRR14364154	SAMN18927128	PRJNA726267	New Zealand	Oceana	11	44.7851	5.31081	2081.78	267.499	46.4839	50.4583
SRR14364149	SAMN18927129	PRJNA726267	New Zealand	Oceana	11	44.2051	7.81673	2200.51	268.359	49.7796	51.7833
SRR14364146	SAMN18927132	PRJNA726267	New Zealand	Oceana	11	40.4756	9.71955	2050.02	251.571	50.6482	48.5652
SRR15010372	SAMN19975905	PRJNA742769	USA	North America	68	100.436	11.5687	2555.29	647.262	25.4419	96.0324	SRA
SRR15010401	SAMN19975879	PRJNA742769	USA	North America	57	105.852	8.13021	2797.87	829.497	26.432	102.463
SRR15010399	SAMN19975881	PRJNA742769	USA	North America	68	109.771	11.291	3003.2	486.32	27.3587	104.016
SRR15010343	SAMN19975869	PRJNA742769	USA	North America	68	71.9611	9.59716	2068.32	428.524	28.7421	72.3942
SRR15010383	SAMN19975895	PRJNA742769	USA	North America	79	91.2106	7.55005	2666.49	590.378	29.2345	86.493
SRR15010335	SAMN19975939	PRJNA742769	USA	North America	28	79.5917	10.2783	2337.53	399.732	29.3691	74.8232
SRR15010354	SAMN19975868	PRJNA742769	USA	North America	25	100.308	9.37547	2950.37	769.909	29.4131	97.2627
SRR15010374	SAMN19975903	PRJNA742769	USA	North America	68	82.1038	7.68173	2442.2	338.704	29.7453	82.0903
SRR15010404	SAMN19975876	PRJNA742769	USA	North America	28	112.811	11.6802	3408.67	762.44	30.2158	103.218
SRR15010315	SAMN19975957	PRJNA742769	USA	North America	68	88.4756	10.1844	3037.53	552.366	34.3319	82.4079
SRR15010331	SAMN19975942	PRJNA742769	USA	North America	68	61.601	7.69659	2181.46	428.177	35.4128	62.8268
SRR15010400	SAMN19975880	PRJNA742769	USA	North America	68	82.0544	10.717	2964.27	417.094	36.1257	75.4409
SRR15010406	SAMN19975874	PRJNA742769	USA	North America	68	105.385	7.76897	3900.09	518.866	37.0079	98.4226
SRR15010403	SAMN19975877	PRJNA742769	USA	North America	38	96.4842	5.65731	3599.12	566.705	37.3026	88.9688
SRR15010318	SAMN19975954	PRJNA742769	USA	North America	79	77.3749	11.9201	2927.14	780.965	37.8306	74.2456
SRR15010375	SAMN19975902	PRJNA742769	USA	North America	68	61.6103	9.22709	2349.44	279.788	38.1338	59.5863
SRR15010393	SAMN19975886	PRJNA742769	USA	North America	68	49.8765	4.89767	1923.58	335.254	38.5668	48.1708
SRR15010327	SAMN19975946	PRJNA742769	USA	North America	68	69.1291	7.9553	2689.55	470.419	38.9062	73.1811
SRR15010371	SAMN19975906	PRJNA742769	USA	North America	79	82.1736	11.8731	3222.91	450.914	39.2208	77.619
SRR15010409	SAMN19975863	PRJNA742769	USA	North America	79	97.9833	10.9881	3879.84	469.759	39.5969	99.035
SRR15010340	SAMN19975934	PRJNA742769	USA	North America	28	61.2761	6.50499	2429.81	405.353	39.6535	58.5387
SRR15010386	SAMN19975892	PRJNA742769	USA	North America	28	82.5405	7.04287	3306.2	672.787	40.0555	89.0479
SRR15010408	SAMN19975872	PRJNA742769	USA	North America	57	80.1161	6.91875	3224.27	654.742	40.245	81.2359
SRR15010322	SAMN19975951	PRJNA742769	USA	North America	28	75.7153	7.96523	3055.46	632.337	40.3546	72.1097
SRR15010407	SAMN19975873	PRJNA742769	USA	North America	68	71.8721	6.07781	2951.71	229.482	41.0689	70.5555
SRR15010324	SAMN19975949	PRJNA742769	USA	North America	79	99.4719	6.40657	4108.5	955.373	41.3031	98.6999
SRR15010359	SAMN19975917	PRJNA742769	USA	North America	68	62.1865	7.94829	2635.22	341.114	42.376	60.4449
SRR15010350	SAMN19975925	PRJNA742769	USA	North America	79	74.2483	6.9275	3161.86	534.451	42.5849	73.6089
SRR15010373	SAMN19975904	PRJNA742769	USA	North America	1	68.9234	9.79526	2943.55	300.721	42.7075	67.0639
SRR15010346	SAMN19975929	PRJNA742769	USA	North America	28	59.8586	7.45388	2591.34	645.094	43.291	58.242
SRR15010358	SAMN19975918	PRJNA742769	USA	North America	67	20.8573	3.82724	905.13	112.473	43.3963	18.1528
SRR15010355	SAMN19975921	PRJNA742769	USA	North America	68	67.9172	5.1142	2980.32	352.969	43.8817	72.3416
SRR15010382	SAMN19975896	PRJNA742769	USA	North America	79	68.013	7.43404	2994.71	318.576	44.0314	72.3551
SRR15010317	SAMN19975955	PRJNA742769	USA	North America	28	79.2625	11.962	3520.85	667.846	44.4201	83.7396
SRR15010336	SAMN19975938	PRJNA742769	USA	North America	68	69.0735	7.8583	3075.01	474.642	44.5179	70.332
SRR15010356	SAMN19975920	PRJNA742769	USA	North America	79	64.9592	10.8009	2901.88	335.621	44.6724	63.3179
SRR15010319	SAMN19975953	PRJNA742769	USA	North America	79	66.0513	15.5224	2957.9	544.654	44.7818	70.6771
SRR15010348	SAMN19975927	PRJNA742769	USA	North America	79	57.223	5.02297	2574.57	439.224	44.992	64.6847
SRR15010396	SAMN19975883	PRJNA742769	USA	North America	68	68.3712	11.1326	3080.21	366.006	45.0513	60.3933
SRR15010338	SAMN19975936	PRJNA742769	USA	North America	38	78.8968	5.80342	3554.62	549.407	45.054	75.2072
SRR15010361	SAMN19975915	PRJNA742769	USA	North America	68	74.0513	9.59362	3351.26	388.782	45.2559	67.7732
SRR15010385	SAMN19975893	PRJNA742769	USA	North America	68	71.5825	9.33135	3248.3	368.793	45.3785	66.0231
SRR15010391	SAMN19975888	PRJNA742769	USA	North America	38	54.7684	6.27118	2497.92	343.274	45.6088	56.9043
SRR15010349	SAMN19975926	PRJNA742769	USA	North America	11	67.9216	6.1027	3124.89	537.232	46.0073	69.3639
SRR15010352	SAMN19975923	PRJNA742769	USA	North America	68	72.0191	5.23988	3341.42	526.507	46.3963	75.9905
SRR15010332	SAMN19975870	PRJNA742769	USA	North America	68	73.6825	12.2419	3425.66	377.606	46.4921	79.6894
SRR15010410	SAMN19975862	PRJNA742769	USA	North America	28	74.8808	8.17893	3506.66	595.605	46.8299	74.537
SRR15010360	SAMN19975916	PRJNA742769	USA	North America	28	65.3391	5.03786	3074.44	333.041	47.0536	67.5455
SRR15010328	SAMN19975945	PRJNA742769	USA	North America	68	65.5689	6.59133	3132.17	505.757	47.7692	67.1121
SRR15010362	SAMN19975914	PRJNA742769	USA	North America	54	77.1124	8.33743	3684.52	856.913	47.7812	74.1113
SRR15010334	SAMN19975940	PRJNA742769	USA	North America	68	76.2335	7.48322	3679.61	557.859	48.2677	74.244
SRR15010329	SAMN19975944	PRJNA742769	USA	North America	79	77.449	9.25289	3804.92	722.347	49.1281	81.8325
SRR15010341	SAMN19975933	PRJNA742769	USA	North America	68	69.6757	8.50277	3436.67	538.689	49.3237	71.0055
SRR15010367	SAMN19975910	PRJNA742769	USA	North America	28	47.7813	7.36882	2360.98	252.231	49.4122	51.5303
SRR15010390	SAMN19975889	PRJNA742769	USA	North America	68	55.2292	6.99108	2731.7	308.588	49.4611	55.8765
SRR15010380	SAMN19975898	PRJNA742769	USA	North America	79	77.8888	9.04371	3858.63	428.643	49.5402	78.8273
SRR15010316	SAMN19975956	PRJNA742769	USA	North America	79	70.1544	10.0511	3476.27	547.526	49.5517	76.9621
SRR15010394	SAMN19975885	PRJNA742769	USA	North America	68	37.4126	6.14002	1855.42	231.157	49.5935	38.9295
SRR15010353	SAMN19975922	PRJNA742769	USA	North America	28	58.7894	6.50193	2916.98	212.696	49.6174	57.9203
SRR15010337	SAMN19975937	PRJNA742769	USA	North America	68	62.4762	10.255	3114.66	501.179	49.8535	62.9257
SRR15010347	SAMN19975928	PRJNA742769	USA	North America	79	73.1896	7.45878	3671.27	642.744	50.1611	73.675
SRR15010398	SAMN19975864	PRJNA742769	USA	North America	28	84.8159	7.69759	4260.74	324.064	50.2352	87.2313
SRR15010397	SAMN19975882	PRJNA742769	USA	North America	11	69.6986	11.1706	3555.83	499.301	51.0173	68.4187
SRR15010330	SAMN19975943	PRJNA742769	USA	North America	68	84.0815	12.7163	4311.22	749.399	51.2743	80.9597
SRR15010333	SAMN19975941	PRJNA742769	USA	North America	64	88.1445	8.97194	4528.48	827.858	51.3756	88.0702
SRR15010339	SAMN19975935	PRJNA742769	USA	North America	68	59.8184	9.35836	3081.13	505.695	51.5081	63.3351
SRR15010384	SAMN19975894	PRJNA742769	USA	North America	68	59.0377	9.75816	3044.24	372.225	51.5643	64.0232
SRR15010381	SAMN19975897	PRJNA742769	USA	North America	68	63.8728	10.5715	3299.17	359.327	51.6522	60.3723
SRR15010363	SAMN19975913	PRJNA742769	USA	North America	68	62.7566	6.77404	3251.35	356.713	51.8088	64.6275
SRR15010345	SAMN19975930	PRJNA742769	USA	North America	21	73.3879	14.2115	3804.26	917.432	51.8377	73.9448
SRR15010379	SAMN19975899	PRJNA742769	USA	North America	70	79.4978	10.9041	4381.48	922.232	55.1145	83.8074
SRR15010364	SAMN19975912	PRJNA742769	USA	North America	68	61.7233	5.76165	3403.04	409.745	55.1338	65.1388
SRR15010344	SAMN19975931	PRJNA742769	USA	North America	68	73.3768	9.14207	4111.76	626.558	56.0362	78.5489
SRR15010395	SAMN19975884	PRJNA742769	USA	North America	68	54.2162	4.37082	3050.69	415.805	56.2691	52.3919
SRR15010378	SAMN19975900	PRJNA742769	USA	North America	68	77.4966	9.90545	4405.07	551.42	56.8421	76.1148
SRR15010376	SAMN19975866	PRJNA742769	USA	North America	38	79.8023	9.60264	4549.17	277.6	57.0055	82.7803
SRR15010321	SAMN19975871	PRJNA742769	USA	North America	68	95.9975	8.12457	5498.89	584.804	57.2816	99.0494
SRR15010405	SAMN19975875	PRJNA742769	USA	North America	68	86.5349	10.9618	4996.19	605.532	57.7361	91.7739
SRR15010368	SAMN19975909	PRJNA742769	USA	North America	68	52.9148	8.43312	3094.14	377.183	58.474	56.1282
SRR15010320	SAMN19975952	PRJNA742769	USA	North America	79	77.546	8.89332	4535.66	858.532	58.4899	84.575
SRR15010357	SAMN19975919	PRJNA742769	USA	North America	68	62.9561	9.23381	3687.65	390.65	58.575	63.6291
SRR15010326	SAMN19975947	PRJNA742769	USA	North America	28	71.2316	8.64905	4210.34	622.021	59.1077	70.966
SRR15010370	SAMN19975907	PRJNA742769	USA	North America	1	46.5349	6.44424	2788.96	301.633	59.9327	53.7782
SRR15010369	SAMN19975908	PRJNA742769	USA	North America	1	53.7202	12.4777	3302.81	335.093	61.4817	62.2457
SRR15010342	SAMN19975932	PRJNA742769	USA	North America	28	59.5417	8.3067	3663.64	540.134	61.5307	62.986
SRR15010387	SAMN19975865	PRJNA742769	USA	North America	68	84.5429	8.0647	5265.52	491.418	62.2822	93.4579
SRR15010351	SAMN19975924	PRJNA742769	USA	North America	1	71.1019	16.1633	4444.46	650.454	62.5083	73.9029
SRR15010366	SAMN19975911	PRJNA742769	USA	North America	28	53.8153	12.2311	3475.21	349.778	64.5766	61.4526
SRR15010377	SAMN19975901	PRJNA742769	USA	North America	38	57.399	7.27961	3758.23	464.887	65.4755	59.8699
SRR15010392	SAMN19975887	PRJNA742769	USA	North America	68	40.9308	6.89656	2828.08	324.179	69.0942	44.8329
SRR15010389	SAMN19975890	PRJNA742769	USA	North America	38	69.5855	8.10854	4973.77	504.271	71.477	71.7239
SRR15010365	SAMN19975867	PRJNA742769	USA	North America	68	65.6757	9.48529	5603.75	433.806	85.3245	73.0241
SRR15597331	SAMN20946021	PRJNA757188	USA	North America	38	9.65225	4.36281	11.4874	25.2029	1.19013	8.49967	DOI: 10.1128/msphere.00922-21
SRR15597333	SAMN20947068	PRJNA757188	USA	North America	38	5.67449	2.33338	10.6349	15.0317	1.87417	5.69361
SRR15597332	SAMN20947069	PRJNA757188	USA	North America	38	8.2798	4.30585	17.4456	23.9139	2.10701	6.75151
SRR16079628	SAMN21848487	PRJNA766444	China	Asia	49	205.46	28.6276	5584.95	1138.07	27.1827	265.335	SRA
SRR16079627	SAMN21848487	PRJNA766444	China	Asia	49	206.484	18.3691	11036.4	2181.28	53.4492	276.851
SRR16079626	SAMN21848487	PRJNA766444	China	Asia	48	170.376	18.0386	9908.14	1982.27	58.1547	227.392
SRR17574058	SAMN24786120	PRJNA768288	Netherlands	Europe	11	60.6973	7.25058	298.471	58.8872	4.91737	89.886	https://doi.org/10.1101/2022.01.14.476329
SRR17573942	SAMN24786026	PRJNA768288	Netherlands	Europe	11	88.6325	11.6618	1183.43	177.863	13.3521	107.462
SRR17574013	SAMN24786042	PRJNA768288	Netherlands	Europe	11	77.3972	12.5129	1087.12	223.945	14.046	96.1698
SRR17574012	SAMN24786043	PRJNA768288	Netherlands	Europe	11	90.9469	12.4291	1298.51	256.181	14.2777	129.284
SRR17574087	SAMN24786022	PRJNA768288	Netherlands	Europe	11	106.672	12.3969	1575.17	316.691	14.7664	133.751
SRR17573964	SAMN24786024	PRJNA768288	Netherlands	Europe	11	86.9179	9.8037	1313.05	191.937	15.1068	101.518
SRR17574093	SAMN24786061	PRJNA768288	Netherlands	Europe	11	104.977	16.7765	1592.5	326.695	15.1701	125.835
SRR17574063	SAMN24786027	PRJNA768288	Netherlands	Europe	11	91.084	10.5251	1417.55	225.028	15.5632	110.232
SRR17573953	SAMN24786025	PRJNA768288	Netherlands	Europe	11	81.3348	8.80824	1296.52	195.698	15.9406	101.772
SRR17573974	SAMN24786035	PRJNA768288	Netherlands	Europe	11	89.4768	10.2561	1427.27	227.24	15.9513	100.718
SRR17574065	SAMN22024769	PRJNA768288	Ireland	Europe	11	49.1371	7.63302	800.035	196.22	16.2817	51.5967
SRR17573998	SAMN24786056	PRJNA768288	Netherlands	Europe	11	82.3558	8.98863	1343	224.227	16.3073	98.3369
SRR17574016	SAMN24786039	PRJNA768288	Netherlands	Europe	11	73.1291	9.63397	1202.08	185.148	16.4378	86.8655
SRR17574003	SAMN24786051	PRJNA768288	Netherlands	Europe	11	85.0049	10.0693	1411.25	502.465	16.602	108.707
SRR17574094	SAMN24786060	PRJNA768288	Netherlands	Europe	11	93.9599	13.4453	1562.24	297.937	16.6267	113.397
SRR17573996	SAMN24786033	PRJNA768288	Netherlands	Europe	11	79.9747	8.44878	1403.02	300.675	17.5434	96.5719
SRR17574014	SAMN24786041	PRJNA768288	Netherlands	Europe	11	70.2341	8.22641	1250.55	206.009	17.8055	89.3088
SRR17574096	SAMN24786058	PRJNA768288	Netherlands	Europe	11	99.8968	11.3912	1788.68	266.07	17.9053	133.571
SRR17574017	SAMN24786038	PRJNA768288	Netherlands	Europe	11	73.6065	6.55406	1327.15	219.983	18.0304	95.5383
SRR17574076	SAMN24786023	PRJNA768288	Netherlands	Europe	11	98.2038	5.49484	1771.72	272.006	18.0413	124.057
SRR17573997	SAMN24786021	PRJNA768288	Netherlands	Europe	11	89.0581	10.0945	1610.7	381.447	18.0859	120.25
SRR17574009	SAMN24786046	PRJNA768288	Netherlands	Europe	11	89.3298	9.1355	1618.62	277.25	18.1196	116.489
SRR17574019	SAMN24786019	PRJNA768288	Netherlands	Europe	11	84.5411	10.2012	1560.77	356.334	18.4617	99.6474
SRR17574006	SAMN24786048	PRJNA768288	Netherlands	Europe	11	81.546	8.53602	1511.22	231.159	18.5321	112.051
SRR17574095	SAMN24786059	PRJNA768288	Netherlands	Europe	11	87.6868	9.46342	1634.47	280.816	18.6398	108.036
SRR17574029	SAMN24786030	PRJNA768288	Netherlands	Europe	11	96.7326	9.72792	1844.52	268.706	19.0683	127.757
SRR17574081	SAMN24786072	PRJNA768288	Netherlands	Europe	11	97.6918	12.0345	1871.12	550.881	19.1533	126.476
SRR17574010	SAMN24786045	PRJNA768288	Netherlands	Europe	11	74.1841	8.94714	1448.18	234.969	19.5214	92.8581
SRR17574001	SAMN24786053	PRJNA768288	Netherlands	Europe	11	85.0846	12.2214	1682.25	252.358	19.7716	112.54
SRR17574027	SAMN24786036	PRJNA768288	Netherlands	Europe	11	85.1655	7.0411	1694.88	238.483	19.901	105.552
SRR17574002	SAMN24786052	PRJNA768288	Netherlands	Europe	11	84.9907	7.89364	1704.22	244.765	20.0518	113.758
SRR17574040	SAMN24786029	PRJNA768288	Netherlands	Europe	11	97.3342	11.2567	1956.1	299.274	20.0967	120.66
SRR17574085	SAMN24786068	PRJNA768288	Netherlands	Europe	11	84.3799	9.19664	1714.07	303.192	20.3137	103.776
SRR17574108	SAMN24786032	PRJNA768288	Netherlands	Europe	11	112.775	9.69913	2303.05	392.931	20.4216	125.483
SRR17573985	SAMN24786034	PRJNA768288	Netherlands	Europe	11	100.913	12.3594	2072.77	319.44	20.5402	131.854
SRR17574080	SAMN24786073	PRJNA768288	Netherlands	Europe	11	85.5683	10.4376	1767.86	425.527	20.6602	123.271
SRR17574064	SAMN24786018	PRJNA768288	Netherlands	Europe	11	48.3477	9.01041	1010.52	227.892	20.9012	53.7766
SRR17574051	SAMN24786028	PRJNA768288	Netherlands	Europe	11	81.7474	11.1566	1712.33	206.732	20.9466	97.9626
SRR17574018	SAMN24786037	PRJNA768288	Netherlands	Europe	11	83.6702	7.84404	1770.12	209.738	21.156	94.8671
SRR17574089	SAMN24786065	PRJNA768288	Netherlands	Europe	11	97.5083	12.9757	2074.62	426.528	21.2764	142.689
SRR17574078	SAMN24786075	PRJNA768288	Netherlands	Europe	11	74.5158	6.55274	1624.39	401.541	21.7992	95.4157
SRR17574007	SAMN24786047	PRJNA768288	Netherlands	Europe	11	83.1099	9.4277	1828.03	184.835	21.9953	111.899
SRR17574004	SAMN24786050	PRJNA768288	Netherlands	Europe	11	77.2915	6.30588	1702.52	266.005	22.0273	103.639
SRR17574000	SAMN24786054	PRJNA768288	Netherlands	Europe	11	69.0136	8.94544	1541.24	302.031	22.3324	94.2979
SRR17574090	SAMN24786064	PRJNA768288	Netherlands	Europe	11	79.4219	9.78669	1786.08	262.033	22.4885	102.671
SRR17574083	SAMN24786070	PRJNA768288	Netherlands	Europe	11	81.8406	11.9397	1853.24	372.339	22.6445	116.088
SRR17574015	SAMN24786040	PRJNA768288	Netherlands	Europe	11	67.7962	10.2191	1566.34	216.95	23.1037	90.615
SRR17574084	SAMN24786069	PRJNA768288	Netherlands	Europe	11	83.0593	11.1474	1928.52	377.517	23.2186	114.935
SRR17574079	SAMN24786074	PRJNA768288	Netherlands	Europe	11	76.7881	6.83328	1785.52	306.542	23.2526	104.342
SRR17574097	SAMN24786057	PRJNA768288	Netherlands	Europe	11	87.7875	7.65741	2092.41	355.704	23.835	128.042
SRR17574005	SAMN24786049	PRJNA768288	Netherlands	Europe	11	89.6597	13.4344	2182.5	358.204	24.342	113.661
SRR17574091	SAMN24786063	PRJNA768288	Netherlands	Europe	11	78.9944	10.7216	1923	300.546	24.3434	112.319
SRR17574008	SAMN24786020	PRJNA768288	Netherlands	Europe	11	91.7455	14.9912	2263.76	306.548	24.6743	113.533
SRR17573965	SAMN24786205	PRJNA768288	Netherlands	Europe	11	104.907	10.1107	2607.82	352.797	24.8583	119.088
SRR17573999	SAMN24786055	PRJNA768288	Netherlands	Europe	11	85.4287	8.26831	2190.18	405.818	25.6375	124.619
SRR17574011	SAMN24786044	PRJNA768288	Netherlands	Europe	11	95.677	11.4102	2469.33	251.031	25.809	125.12
SRR17574022	SAMN24786211	PRJNA768288	Netherlands	Europe	11	79.4768	8.65897	2070.75	361.482	26.0548	99.9894
SRR17574119	SAMN24786031	PRJNA768288	Netherlands	Europe	11	82.0704	12.159	2212.26	295.159	26.9557	95.5717
SRR17574055	SAMN24786123	PRJNA768288	Netherlands	Europe	11	81.5435	14.7695	2199.78	385.205	26.9767	103.944
SRR17574028	SAMN24786206	PRJNA768288	Netherlands	Europe	11	94.4898	18.925	2601.41	460.781	27.5311	118.711
SRR17573955	SAMN24786095	PRJNA768288	Netherlands	Europe	11	78.9784	10.6592	2203.28	444.565	27.8972	92.2739
SRR17574092	SAMN24786062	PRJNA768288	Netherlands	Europe	11	71.2094	10.0152	2072.37	511.801	29.1025	101.889
SRR17573933	SAMN24786115	PRJNA768288	Netherlands	Europe	11	92.9722	8.40859	2742.57	463.731	29.4988	110.305
SRR17574104	SAMN24786170	PRJNA768288	Netherlands	Europe	11	100.166	12.6323	2977.84	309.573	29.7292	127.603
SRR17574021	SAMN24786212	PRJNA768288	Netherlands	Europe	11	91.5473	8.55034	2826.88	409.799	30.8789	114.805
SRR17573961	SAMN24786089	PRJNA768288	Netherlands	Europe	11	100.838	12.214	3152.81	378.874	31.2662	118.782
SRR17573960	SAMN24786090	PRJNA768288	Netherlands	Europe	11	83.8091	7.14826	2628.94	330.76	31.3681	103.318
SRR17574025	SAMN24786208	PRJNA768288	Netherlands	Europe	11	91.6788	12.2588	2928.22	446.557	31.9399	118.117
SRR17573958	SAMN24786092	PRJNA768288	Netherlands	Europe	11	84.8511	7.85621	2711.26	324.099	31.9531	108.572
SRR17573956	SAMN24786094	PRJNA768288	Netherlands	Europe	11	91.3403	13.368	2960.66	464.263	32.4135	117.747
SRR17573954	SAMN24786096	PRJNA768288	Netherlands	Europe	11	100.306	17.312	3254.17	505.925	32.4425	111.296
SRR17573975	SAMN24786196	PRJNA768288	Netherlands	Europe	11	82.1896	10.6578	2824.87	168	34.3701	105.128
SRR17573963	SAMN24786087	PRJNA768288	Netherlands	Europe	11	100.196	9.37585	3450.67	508.872	34.4392	123.572
SRR17574050	SAMN24786127	PRJNA768288	Netherlands	Europe	11	83.4521	11.2568	2879.28	360.716	34.5022	99.5154
SRR17573962	SAMN24786088	PRJNA768288	Netherlands	Europe	11	76.5361	11.4291	2726.87	360.62	35.6286	99.8315
SRR17573959	SAMN24786091	PRJNA768288	Netherlands	Europe	11	87.0519	8.2342	3111.43	351.981	35.7422	109.293
SRR17574052	SAMN24786126	PRJNA768288	Netherlands	Europe	11	82.0754	9.61209	3007.52	186.638	36.6434	99.8766
SRR17574061	SAMN24786116	PRJNA768288	Netherlands	Europe	11	83.4175	7.53745	3061.88	352.421	36.7054	105.49
SRR17573973	SAMN24786197	PRJNA768288	Netherlands	Europe	11	71.2786	7.11365	2616.94	228.868	36.7143	91.1191
SRR17574127	SAMN24786149	PRJNA768288	Netherlands	Europe	11	105.294	17.4891	3903.13	374.887	37.0689	130.126
SRR17573951	SAMN24786098	PRJNA768288	Netherlands	Europe	11	86.3329	7.99558	3218.21	439.371	37.2767	107.881
SRR17574109	SAMN24786166	PRJNA768288	Netherlands	Europe	11	96.8579	11.5861	3612.21	219.597	37.2939	125.398
SRR17573952	SAMN24786097	PRJNA768288	Netherlands	Europe	11	90.5627	12.9044	3377.56	428.138	37.2952	112.823
SRR17574023	SAMN24786210	PRJNA768288	Netherlands	Europe	11	98.8499	15.5626	3697.14	329.344	37.4015	128.734
SRR17574020	SAMN24786213	PRJNA768288	Netherlands	Europe	11	83.4515	11.2835	3146.03	359.934	37.6989	119.53
SRR17573949	SAMN24786100	PRJNA768288	Netherlands	Europe	11	92.9815	13.4005	3512.03	454.492	37.7713	105.546
SRR17573976	SAMN24786195	PRJNA768288	Netherlands	Europe	11	77.9475	11.3783	2948.36	223.919	37.825	101.572
SRR17574126	SAMN24786150	PRJNA768288	Netherlands	Europe	11	81.5578	9.26086	3097.79	298.168	37.9828	105.026
SRR17573970	SAMN24786200	PRJNA768288	Netherlands	Europe	11	93.1309	6.93285	3590.44	522.775	38.5526	113.49
SRR17574045	SAMN24786132	PRJNA768288	Netherlands	Europe	11	88.9129	12.8287	3433.47	213.938	38.6161	108.084
SRR17574123	SAMN24786153	PRJNA768288	Netherlands	Europe	11	81.3805	11.7721	3174.59	377.96	39.0092	101.711
SRR17573945	SAMN24786104	PRJNA768288	Netherlands	Europe	11	73.2298	9.70334	2867.27	442.438	39.1544	93.4052
SRR17574106	SAMN24786168	PRJNA768288	Netherlands	Europe	11	97.4237	7.78129	3817.81	601.156	39.1877	129.173
SRR17573948	SAMN24786101	PRJNA768288	Netherlands	Europe	11	85.1723	10.8741	3342.81	430.985	39.2476	100.865
SRR17573967	SAMN24786203	PRJNA768288	Netherlands	Europe	11	86.362	10.6997	3394.44	209.72	39.3049	105.036
SRR17574113	SAMN24786162	PRJNA768288	Netherlands	Europe	11	85.3101	7.84831	3394.54	261.506	39.7906	104.282
SRR17574128	SAMN24786148	PRJNA768288	Netherlands	Europe	11	101.382	10.674	4039.41	378.736	39.8436	124.493
SRR17573944	SAMN24786105	PRJNA768288	Netherlands	Europe	11	74.8073	8.88207	2998.06	452.548	40.0771	103.964
SRR17574069	SAMN24786083	PRJNA768288	Netherlands	Europe	11	94.113	11.0416	3773.66	534.887	40.0971	119.642
SRR17574031	SAMN24786145	PRJNA768288	Netherlands	Europe	11	99.0933	11.9574	3989.32	335.13	40.2582	133.826
SRR17573947	SAMN24786102	PRJNA768288	Netherlands	Europe	11	77.3317	10.8736	3115.27	414.444	40.2845	102.089
SRR17574036	SAMN24786140	PRJNA768288	Netherlands	Europe	11	75.265	10.1494	3048.48	212.167	40.5032	96.78
SRR17573981	SAMN24786190	PRJNA768288	Netherlands	Europe	11	84.9006	8.2001	3446.99	273.617	40.6003	117.237
SRR17574103	SAMN24786171	PRJNA768288	Netherlands	Europe	11	99.714	8.57147	4048.43	296.399	40.6004	127.474
SRR17574121	SAMN24786155	PRJNA768288	Netherlands	Europe	11	88.1093	10.7076	3578.88	271.36	40.6186	114.005
SRR17574066	SAMN24786086	PRJNA768288	Netherlands	Europe	11	71.7616	12.477	2940.81	338.419	40.9802	90.5437
SRR17574030	SAMN24786146	PRJNA768288	Netherlands	Europe	11	83.8678	10.8023	3444.43	247.197	41.0698	105.48
SRR17573991	SAMN24786181	PRJNA768288	Netherlands	Europe	11	94.2668	9.85377	3889.9	293.827	41.2647	113.273
SRR17573950	SAMN24786099	PRJNA768288	Netherlands	Europe	11	95.8777	11.7694	3958.7	493.692	41.2891	114.546
SRR17574049	SAMN24786128	PRJNA768288	Netherlands	Europe	11	77.0093	10.3883	3184.65	200.557	41.3541	103.656
SRR17574071	SAMN24786081	PRJNA768288	Netherlands	Europe	11	91.8907	16.8071	3812.81	316.241	41.4929	109.837
SRR17573943	SAMN24786106	PRJNA768288	Netherlands	Europe	11	86.6652	9.9801	3618.73	252.88	41.7553	110.77
SRR17574038	SAMN24786138	PRJNA768288	Netherlands	Europe	11	76.0624	9.68365	3181.65	310.379	41.8295	99.5263
SRR17573957	SAMN24786093	PRJNA768288	Netherlands	Europe	11	74.6183	8.08935	3121.38	436.916	41.8313	93.8553
SRR17574105	SAMN24786169	PRJNA768288	Netherlands	Europe	11	93.6201	13.6541	3933.34	738.086	42.0138	108.238
SRR17573969	SAMN24786201	PRJNA768288	Netherlands	Europe	11	75.8128	8.90078	3209.94	209.139	42.3403	93.5479
SRR17574112	SAMN24786163	PRJNA768288	Netherlands	Europe	11	76.4009	7.49927	3237.55	233.244	42.3759	93.4628
SRR17574118	SAMN24786157	PRJNA768288	Netherlands	Europe	11	68.8796	9.48675	2924.47	235.213	42.4578	93.1334
SRR17574042	SAMN24786135	PRJNA768288	Netherlands	Europe	11	89.7177	9.09223	3812.33	476.379	42.4925	123.29
SRR17574116	SAMN24786159	PRJNA768288	Netherlands	Europe	11	87.8901	10.1531	3744.9	393.079	42.6089	112.336
SRR17574048	SAMN24786129	PRJNA768288	Netherlands	Europe	11	86.4756	11.6601	3686.92	249.109	42.6354	114.446
SRR17574032	SAMN24786144	PRJNA768288	Netherlands	Europe	11	105.637	12.6018	4532.88	314.731	42.9098	127.905
SRR17574099	SAMN24786175	PRJNA768288	Netherlands	Europe	11	73.407	9.65066	3167.29	330.435	43.1469	95.7611
SRR17574053	SAMN24786125	PRJNA768288	Netherlands	Europe	11	99.7542	8.79945	4322.99	268.658	43.3365	135.739
SRR17574047	SAMN24786130	PRJNA768288	Netherlands	Europe	11	91.6597	10.4701	3987.07	243.734	43.4987	121.45
SRR17573984	SAMN24786187	PRJNA768288	Netherlands	Europe	11	87.8999	9.96731	3833.65	269.721	43.6138	109.469
SRR17573979	SAMN24786192	PRJNA768288	Netherlands	Europe	11	82.1983	9.32265	3600.97	262.104	43.8083	98.4622
SRR17573934	SAMN24786114	PRJNA768288	Netherlands	Europe	11	76.6473	6.65741	3364.97	223.881	43.902	97.5567
SRR17573992	SAMN24786180	PRJNA768288	Netherlands	Europe	11	101.303	10.7362	4459.7	349.367	44.0235	136.332
SRR17574115	SAMN24786160	PRJNA768288	Netherlands	Europe	11	92.0821	10.6667	4064.42	332.515	44.139	121.51
SRR17574054	SAMN24786124	PRJNA768288	Netherlands	Europe	11	99.315	11.4679	4408.01	283.332	44.3841	121.549
SRR17574060	SAMN24786118	PRJNA768288	Netherlands	Europe	11	88.5985	10.3047	3944.1	273.626	44.5166	112.532
SRR17574041	SAMN24786136	PRJNA768288	Netherlands	Europe	11	74.8369	6.9514	3342.86	224.299	44.6686	99.8924
SRR17573986	SAMN24786186	PRJNA768288	Netherlands	Europe	11	86.3613	7.54687	3867.51	273.155	44.7829	111.5
SRR17574098	SAMN24786176	PRJNA768288	Netherlands	Europe	11	87.5225	11.6674	3944.27	280.947	45.0658	123.409
SRR17574039	SAMN24786137	PRJNA768288	Netherlands	Europe	11	82.8981	6.98472	3753.11	338.655	45.2738	118.284
SRR17574034	SAMN24786142	PRJNA768288	Netherlands	Europe	11	84.1767	8.78051	3840.85	252.141	45.6284	105.331
SRR17573978	SAMN24786193	PRJNA768288	Netherlands	Europe	11	78.7851	10.797	3601.81	272.712	45.7169	105.256
SRR17574124	SAMN24786152	PRJNA768288	Netherlands	Europe	11	96.0951	10.6322	4394.05	440.701	45.726	132.184
SRR17573937	SAMN24786111	PRJNA768288	Netherlands	Europe	11	83.706	7.57672	3827.81	251.223	45.7293	109.751
SRR17574101	SAMN24786173	PRJNA768288	Netherlands	Europe	11	74.5837	10.353	3410.76	268.544	45.7306	101.297
SRR17574070	SAMN24786082	PRJNA768288	Netherlands	Europe	11	76.5028	10.2476	3500.49	370.581	45.7563	99.5765
SRR17573968	SAMN24786202	PRJNA768288	Netherlands	Europe	11	86.3978	9.96737	3963.25	280.224	45.8721	116.257
SRR17574100	SAMN24786174	PRJNA768288	Netherlands	Europe	11	35.5318	7.36028	1632.11	118.44	45.9337	42.629
SRR17574120	SAMN24786156	PRJNA768288	Netherlands	Europe	11	72.8283	7.07274	3346.42	268.384	45.9495	102.256
SRR17573995	SAMN24786177	PRJNA768288	Netherlands	Europe	11	101.595	15.2538	4683.22	303.568	46.0968	127.982
SRR17574057	SAMN24786121	PRJNA768288	Netherlands	Europe	11	82.6683	9.6834	3824.7	308.05	46.2656	114.984
SRR17574086	SAMN24786067	PRJNA768288	Netherlands	Europe	11	85.882	11.47	3976.84	391.396	46.3059	114.342
SRR17574068	SAMN24786084	PRJNA768288	Netherlands	Europe	11	80.74	10.4466	3748.47	466.1	46.4264	97.746
SRR17573980	SAMN24786191	PRJNA768288	Netherlands	Europe	11	89.0476	8.03836	4180.86	271.775	46.9509	115.992
SRR17573993	SAMN24786179	PRJNA768288	Netherlands	Europe	11	99.7758	11.8925	4693.53	274.292	47.0408	134.527
SRR17574088	SAMN24786066	PRJNA768288	Netherlands	Europe	11	94.0889	16.8972	4440.39	446.388	47.1935	122.292
SRR17573987	SAMN24786185	PRJNA768288	Netherlands	Europe	11	110.884	8.0988	5259.06	358.007	47.4283	137.689
SRR17573989	SAMN24786183	PRJNA768288	Netherlands	Europe	11	93.4305	11.8947	4464.85	280.883	47.788	118.046
SRR17574107	SAMN24786167	PRJNA768288	Netherlands	Europe	11	94.0846	19.6433	4512.69	306.308	47.9642	127.194
SRR17574072	SAMN24786080	PRJNA768288	Netherlands	Europe	11	72.9092	9.34597	3503.59	297.753	48.0541	94.6345
SRR17573941	SAMN24786107	PRJNA768288	Netherlands	Europe	11	75.5522	9.16429	3640.23	224.005	48.1816	110.814
SRR17574129	SAMN24786147	PRJNA768288	Netherlands	Europe	11	81.5256	9.62452	3946.58	331.376	48.409	111.939
SRR17574117	SAMN24786158	PRJNA768288	Netherlands	Europe	11	74.8338	9.17507	3630.56	573.02	48.5149	99.4941
SRR17574044	SAMN24786133	PRJNA768288	Netherlands	Europe	11	72.9932	10.9929	3548.21	214.051	48.6101	101.783
SRR17574073	SAMN24786079	PRJNA768288	Netherlands	Europe	11	82.0463	10.9577	3990.2	339.515	48.6335	107.809
SRR17573972	SAMN24786198	PRJNA768288	Netherlands	Europe	11	75.58	11.0308	3683.73	251.439	48.7395	100.982
SRR17574043	SAMN24786134	PRJNA768288	Netherlands	Europe	11	76.7085	6.50855	3748.01	231.447	48.8605	104.5
SRR17573946	SAMN24786103	PRJNA768288	Netherlands	Europe	11	86.1204	6.88514	4211.32	515.601	48.9004	108.455
SRR17574062	SAMN24786117	PRJNA768288	Netherlands	Europe	11	69.1692	7.17974	3413.56	296.962	49.3509	89.3484
SRR17573982	SAMN24786189	PRJNA768288	Netherlands	Europe	11	79.8376	11.3665	4009.34	241.921	50.2187	98.1155
SRR17574067	SAMN24786085	PRJNA768288	Netherlands	Europe	11	77.4052	11.2458	3935.81	503.055	50.8469	101.197
SRR17573966	SAMN24786204	PRJNA768288	Netherlands	Europe	11	81.0587	9.82717	4122.57	332.128	50.859	104.76
SRR17574077	SAMN24786076	PRJNA768288	Netherlands	Europe	11	79.5207	13.2463	4087.29	416.711	51.3991	102.027
SRR17574035	SAMN24786141	PRJNA768288	Netherlands	Europe	11	64.5738	10.363	3320.06	217.805	51.415	93.6695
SRR17574125	SAMN24786151	PRJNA768288	Netherlands	Europe	11	73.491	6.44961	3795.06	253.47	51.6398	101.261
SRR17574059	SAMN24786119	PRJNA768288	Netherlands	Europe	11	86.0284	8.23829	4445.11	276.739	51.6703	115.757
SRR17573938	SAMN24786110	PRJNA768288	Netherlands	Europe	11	79.5621	11.8334	4119.14	310.844	51.7727	103.966
SRR17574046	SAMN24786131	PRJNA768288	Netherlands	Europe	11	90.4812	11.0548	4688.71	311.543	51.8197	128.181
SRR17573983	SAMN24786188	PRJNA768288	Netherlands	Europe	11	88.7906	10.8789	4697.22	333.064	52.9022	99.2791
SRR17574082	SAMN24786071	PRJNA768288	Netherlands	Europe	11	86.7993	10.4601	4599.91	610.475	52.9948	120.848
SRR17574114	SAMN24786161	PRJNA768288	Netherlands	Europe	11	79.5114	16.2509	4273.69	272.619	53.7493	109.075
SRR17573994	SAMN24786178	PRJNA768288	Netherlands	Europe	11	85.189	9.61188	4645.91	309.884	54.5365	112.51
SRR17573977	SAMN24786194	PRJNA768288	Netherlands	Europe	11	81.1711	12.4314	4434.28	318.111	54.6288	100.239
SRR17574033	SAMN24786143	PRJNA768288	Netherlands	Europe	11	85.7369	11.7657	4696.53	336.382	54.7784	115.918
SRR17573990	SAMN24786182	PRJNA768288	Netherlands	Europe	11	81.7437	10.263	4493.69	317.765	54.973	107.325
SRR17574102	SAMN24786172	PRJNA768288	Netherlands	Europe	11	63.1359	11.5404	3481.19	235.704	55.138	81.2153
SRR17573940	SAMN24786108	PRJNA768288	Netherlands	Europe	11	62.1353	6.68945	3476.2	250.484	55.9456	80.2493
SRR17573988	SAMN24786184	PRJNA768288	Netherlands	Europe	11	91.5917	15.8411	5146.19	375.799	56.1862	111.01
SRR17573971	SAMN24786199	PRJNA768288	Netherlands	Europe	11	82.9957	8.54165	4666.93	458.638	56.231	120.628
SRR17574037	SAMN24786139	PRJNA768288	Netherlands	Europe	11	74.1662	9.13767	4263.31	263.757	57.4832	102.111
SRR17574074	SAMN24786078	PRJNA768288	Netherlands	Europe	11	76.7931	14.8187	4509.13	400.929	58.7179	120.009
SRR17573935	SAMN24786113	PRJNA768288	Netherlands	Europe	11	76.3891	10.7748	4509.01	322.713	59.0268	102.666
SRR17574075	SAMN24786077	PRJNA768288	Netherlands	Europe	11	94.0049	8.73012	5570.73	472.081	59.26	126.603
SRR17574110	SAMN24786165	PRJNA768288	Netherlands	Europe	11	85.0247	10.05	5095.54	397.787	59.9301	111.503
SRR17574024	SAMN24786209	PRJNA768288	Netherlands	Europe	11	69.4676	10.1846	4182.44	428.612	60.2071	93.3726
SRR17573939	SAMN24786109	PRJNA768288	Netherlands	Europe	11	79.407	11.455	4821.31	402.244	60.7164	111.306
SRR17574056	SAMN24786122	PRJNA768288	Netherlands	Europe	11	77.2007	8.18784	4715.64	370.3	61.0828	103.918
SRR17574026	SAMN24786207	PRJNA768288	Netherlands	Europe	11	83.2131	11.56	5162.33	557.719	62.0375	108.596
SRR17574111	SAMN24786164	PRJNA768288	Netherlands	Europe	11	69.5633	6.82078	4474.9	380.48	64.3284	102.04
SRR17573936	SAMN24786112	PRJNA768288	Netherlands	Europe	11	78.6035	9.70592	5210.07	506.918	66.283	114.473
SRR17574122	SAMN24786154	PRJNA768288	Netherlands	Europe	11	69.8289	11.6208	5185.57	414.231	74.2611	102.825
SRR16287627	SAMN22209222	PRJNA770125	Unknown	Unknown	74	128.606	16.7028	267.452	798.994	2.07962	142.22	https://doi.org/10.1128/spectrum.00519-22
SRR16287628	SAMN22209221	PRJNA770125	Unknown	Unknown	11	178.189	16.2938	745.228	1817.48	4.18223	190.054
SRR16539791	SAMN22512820	PRJNA773725	USA	North America	79	58.7597	12.3167	128.303	112.574	2.18351	59.7869	doi: 10.1093/g3journal/jkac075
SRR16539783	SAMN22512827	PRJNA773725	USA	North America	79	78.1921	11.3511	280.463	222.41	3.58685	89.1686
SRR16539789	SAMN22512822	PRJNA773725	USA	North America	79	74.2681	10.1145	314.749	205.919	4.23802	73.6879
SRR16539792	SAMN22512819	PRJNA773725	USA	North America	11	55.3342	10.5848	243.879	163.987	4.40739	52.383
SRR16539772	SAMN22512837	PRJNA773725	USA	North America	78	99.924	12.8902	477.797	399.793	4.7816	112.034
SRR16539787	SAMN22512823	PRJNA773725	USA	North America	77	79.0469	9.85094	399.483	226.459	5.05374	79.6097
SRR16539756	SAMN22512852	PRJNA773725	USA	North America	79	103.338	24.1494	532.864	319.488	5.1565	108.892
SRR16539784	SAMN22512826	PRJNA773725	USA	North America	16	71.8048	7.40595	379.683	256.323	5.28771	79.5068
SRR16539794	SAMN22512817	PRJNA773725	USA	North America	75	44.5368	9.68683	246.735	126.022	5.54004	49.7441
SRR16539767	SAMN22512842	PRJNA773725	USA	North America	79	108.277	15.1104	614.561	312.922	5.67583	123.104
SRR16539775	SAMN22512834	PRJNA773725	USA	North America	26	64.5738	11.7896	367.71	234.02	5.69441	80.8132
SRR16539752	SAMN22512811	PRJNA773725	USA	North America	79	69.8203	16.5173	414.58	258.757	5.93782	73.3094
SRR16539790	SAMN22512821	PRJNA773725	USA	North America	79	39.6411	7.40371	244.547	136.081	6.16901	38.5913
SRR16539781	SAMN22512829	PRJNA773725	USA	North America	16	87.8314	11.8227	562.421	311.419	6.40342	95.3372
SRR16539776	SAMN22512833	PRJNA773725	USA	North America	79	84.467	12.1066	549.776	276.651	6.50877	96.772
SRR16539786	SAMN22512824	PRJNA773725	USA	North America	79	76.3848	8.29953	506.492	248.749	6.63079	88.6301
SRR16539782	SAMN22512828	PRJNA773725	USA	North America	79	104.04	15.8174	721.871	368.965	6.93843	118.152
SRR16539785	SAMN22512825	PRJNA773725	USA	North America	79	89.8542	13.5781	640.209	282.077	7.12497	89.1994
SRR16539773	SAMN22512836	PRJNA773725	USA	North America	79	78.4058	6.76903	577.975	306.466	7.37158	87.721
SRR16539765	SAMN22512843	PRJNA773725	USA	North America	79	111.658	11.5633	835.305	545.045	7.4809	129.683
SRR16539757	SAMN22512851	PRJNA773725	USA	North America	58	134.904	19.9179	1070.56	488.091	7.93574	148.98
SRR16539778	SAMN22512832	PRJNA773725	USA	North America	79	80.4676	14.0741	643.864	380.599	8.00153	92.4399
SRR16539793	SAMN22512818	PRJNA773725	USA	North America	4	31.5009	8.40385	252.548	126.38	8.01717	36.9087
SRR16539780	SAMN22512830	PRJNA773725	USA	North America	79	101.77	11.7518	832.612	402.686	8.18129	118.833
SRR16539779	SAMN22512831	PRJNA773725	USA	North America	79	103.157	16.8708	908.768	379.006	8.80957	124.674
SRR16539796	SAMN22512815	PRJNA773725	USA	North America	79	45.0883	9.04604	398.798	133.255	8.84482	45.8962
SRR16539774	SAMN22512835	PRJNA773725	USA	North America	19	94.9148	12.6111	864.074	374.198	9.10368	103.764
SRR16539769	SAMN22512840	PRJNA773725	USA	North America	68	88.8487	7.82929	809.98	323.419	9.1164	103.047
SRR16539762	SAMN22512846	PRJNA773725	USA	North America	79	121.595	14.756	1174.55	545.24	9.65951	142.823
SRR16539764	SAMN22512844	PRJNA773725	USA	North America	11	81.2773	6.75789	828.423	377.61	10.1925	96.6923
SRR16539760	SAMN22512848	PRJNA773725	USA	North America	75	97.6418	10.6234	996.528	405.947	10.206	116.89
SRR16539750	SAMN22512803	PRJNA773725	USA	North America	79	34.7165	7.28821	365.023	153.811	10.5144	38.4537
SRR16539770	SAMN22512839	PRJNA773725	USA	North America	79	104.679	15.7293	1124.58	351.558	10.7431	126.352
SRR16539758	SAMN22512850	PRJNA773725	USA	North America	9	81.8277	7.22185	879.87	502.381	10.7527	95.8185
SRR16539797	SAMN22512814	PRJNA773725	USA	North America	38	46.4991	8.61929	503.696	155.825	10.8324	47.8615
SRR16539763	SAMN22512845	PRJNA773725	USA	North America	78	91.4317	12.2228	1079.54	475.664	11.807	108.216
SRR16539748	SAMN22512813	PRJNA773725	USA	North America	28	35.3261	8.27426	425.472	141.046	12.0441	36.4584
SRR16539754	SAMN22512809	PRJNA773725	USA	North America	79	35.7813	7.5315	444.371	128.687	12.4191	38.4278
SRR16539753	SAMN22512810	PRJNA773725	USA	North America	79	36.0334	7.76574	466.848	135.53	12.956	37.7142
SRR16539751	SAMN22512812	PRJNA773725	USA	North America	28	42.1884	8.25024	563.642	161.179	13.3601	45.9922
SRR16539777	SAMN22512806	PRJNA773725	USA	North America	79	34.798	5.54992	473.088	125.313	13.5953	35.4112
SRR16539768	SAMN22512841	PRJNA773725	USA	North America	78	119.088	18.2303	1690.64	745.003	14.1965	134.268
SRR16539795	SAMN22512816	PRJNA773725	USA	North America	79	44.4645	10.1808	643.537	219.521	14.4731	49.3222
SRR16539766	SAMN22512807	PRJNA773725	USA	North America	75	38.7653	7.93386	603.607	220.472	15.5708	39.5801
SRR16539771	SAMN22512838	PRJNA773725	USA	North America	66	92.2001	7.07732	1975.21	460.584	21.423	121.342
SRR16539755	SAMN22512808	PRJNA773725	USA	North America	75	72.8901	9.17474	1615.7	469.186	22.1662	82.3162
SRR16539759	SAMN22512849	PRJNA773725	USA	North America	79	99.7461	12.6011	2321.55	651.502	23.2746	116.116
SRR16539749	SAMN22512804	PRJNA773725	USA	North America	79	38.3292	8.84119	893.852	238.997	23.3204	39.8795
SRR16539761	SAMN22512847	PRJNA773725	USA	North America	38	111.967	11.2587	2651.98	726.812	23.6855	134.094
SRR16539788	SAMN22512805	PRJNA773725	USA	North America	11	33.3632	6.67247	989.952	270.683	29.672	34.9993
SRR16944308	SAMN23138669	PRJNA780348	France	Europe	28	143.332	18.4161	1221.25	503.299	8.52043	155.965	https://doi.org/10.3389/ffunb.2022.897954
SRR16944307	SAMN23138670	PRJNA780348	France	Europe	28	110.283	14.0084	1410.19	192.723	12.7871	127.781
SRR16944284	SAMN23138753	PRJNA780348	USA	North America	28	122.422	15.8928	272.634	86.6315	2.22699	170.75	SRA
SRR16944351	SAMN23138749	PRJNA780348	USA	North America	28	138.152	10.966	535.671	99.5946	3.87741	168.337
SRR16944472	SAMN23138606	PRJNA780348	France	Europe	16	182.875	27.8744	1339.26	312.424	7.3234	203.296
SRR16944352	SAMN23138748	PRJNA780348	USA	North America	68	148.631	12.0111	1090.38	169.632	7.33614	186.84
SRR16944292	SAMN23138683	PRJNA780348	France	Europe	11	100.786	15.5935	844.598	327.241	8.38009	118.667
SRR16944389	SAMN23138714	PRJNA780348	France	Europe	79	114.59	9.66125	1230.62	347.66	10.7393	119.108
SRR16944358	SAMN23138742	PRJNA780348	USA	North America	28	147.281	17.733	1584.14	495.063	10.7559	180.748
SRR16944267	SAMN23138768	PRJNA780348	USA	North America	79	169.326	19.483	1837.62	278.773	10.8526	197.225
SRR16944356	SAMN23138744	PRJNA780348	USA	North America	38	163.485	15.3961	1795.8	224.124	10.9845	187.982
SRR16944365	SAMN23138736	PRJNA780348	USA	North America	28	146.18	17.3378	1667.83	314.896	11.4094	165.482
SRR16944357	SAMN23138743	PRJNA780348	USA	North America	78	153.454	12.8921	1843.23	240.674	12.0116	169.675
SRR16944363	SAMN23138738	PRJNA780348	USA	North America	78	157.33	14.4772	1947.57	257.172	12.3789	168.611
SRR16944361	SAMN23138740	PRJNA780348	USA	North America	79	174.711	13.3219	2246.72	288.16	12.8596	205.613
SRR16944418	SAMN23138774	PRJNA780348	USA	North America	28	137.928	15.6495	1781.47	344.509	12.916	172.385
SRR16944272	SAMN23138763	PRJNA780348	USA	North America	79	145.131	14.2631	1885.62	458.691	12.9926	178.554
SRR16944364	SAMN23138737	PRJNA780348	USA	North America	28	167.921	16.4388	2189.78	531.005	13.0406	190.263
SRR16944417	SAMN23138775	PRJNA780348	USA	North America	28	209.385	19.4611	2745.26	624.315	13.1111	269.096
SRR16944268	SAMN23138767	PRJNA780348	USA	North America	11	136.493	14.2182	1791.43	253.876	13.1247	161.333
SRR16944368	SAMN23138733	PRJNA780348	USA	North America	1	124.891	14.7921	1648.06	196.546	13.196	141.015
SRR16944406	SAMN23138785	PRJNA780348	Cote d'Ivoire	Africa	79	144.802	14.0781	1938.75	494.417	13.389	156.618
SRR16944270	SAMN23138765	PRJNA780348	USA	North America	4	157.864	17.4261	2121.59	279.327	13.4393	193.583
SRR16944379	SAMN23138723	PRJNA780348	Belgium	Europe	10	139.749	11.8452	1882.45	197.437	13.4702	161.891
SRR16944420	SAMN23138772	PRJNA780348	USA	North America	68	167.962	18.2695	2269.27	349.448	13.5107	200.32
SRR16944419	SAMN23138773	PRJNA780348	USA	North America	79	155.101	9.93448	2111.08	301.58	13.611	181.945
SRR16944265	SAMN23138770	PRJNA780348	USA	North America	79	147.22	15.7919	2040.57	282.095	13.8607	176.851
SRR16944378	SAMN23138724	PRJNA780348	Belgium	Europe	68	168.479	19.0199	2338.16	314.877	13.878	196.216
SRR16944434	SAMN23138695	PRJNA780348	France	Europe	11	139.508	17.6345	1950.37	248.288	13.9804	155.515
SRR16944280	SAMN23138757	PRJNA780348	USA	North America	28	153.866	17.4539	2152.41	295.088	13.9888	179.878
SRR16944412	SAMN23138780	PRJNA780348	China	Asia	79	121.883	12.9792	1705.07	294.484	13.9893	150.269
SRR16944273	SAMN23138762	PRJNA780348	USA	North America	79	134.08	12.4011	1877.5	244.843	14.0029	154.157
SRR16944353	SAMN23138747	PRJNA780348	USA	North America	75	162.342	15.9375	2288.22	456.366	14.0951	195.042
SRR16944299	SAMN23138677	PRJNA780348	France	Europe	68	127.741	15.3156	1828.35	237.612	14.313	142.544
SRR16944355	SAMN23138745	PRJNA780348	USA	North America	38	153.744	16.3571	2208.89	260.105	14.3673	195.75
SRR16944493	SAMN23138587	PRJNA780348	France	Europe	79	167.111	23.389	2401.82	263.632	14.3726	187.412
SRR16944327	SAMN23138641	PRJNA780348	France	Europe	75	118.159	11.9968	1703.04	232.983	14.4131	126.674
SRR16944408	SAMN23138783	PRJNA780348	Cote d'Ivoire	Africa	68	166.844	16.8675	2414.23	332.662	14.47	214.238
SRR16944380	SAMN23138722	PRJNA780348	Belgium	Europe	66	156.902	21.3831	2281.1	254.523	14.5384	176.438
SRR16944373	SAMN23138729	PRJNA780348	USA	North America	75	130.902	11.6558	1907.7	262.713	14.5736	154.419
SRR16944374	SAMN23138728	PRJNA780348	USA	North America	75	175.048	14.3506	2568.39	322.127	14.6725	207.073
SRR16944288	SAMN23138750	PRJNA780348	USA	North America	28	127.458	14.8632	1872.02	243.22	14.6874	152.233
SRR16944437	SAMN23138692	PRJNA780348	France	Europe	11	125.384	10.6464	1841.65	241.747	14.6881	148.69
SRR16944433	SAMN23138696	PRJNA780348	France	Europe	9	111.649	11.4891	1642.88	426.283	14.7146	127.746
SRR16944271	SAMN23138764	PRJNA780348	USA	North America	79	140.961	10.0989	2089.37	307.991	14.8224	175.253
SRR16944360	SAMN23138741	PRJNA780348	USA	North America	79	160.114	15.9282	2384.32	314.909	14.8914	183.847
SRR16944402	SAMN23138789	PRJNA780348	Cote d'Ivoire	Africa	79	114.697	16.6499	1724.98	198.666	15.0394	127.184
SRR16944285	SAMN23138752	PRJNA780348	USA	North America	72	144.968	13.7016	2180.95	623.879	15.0443	158.273
SRR16944366	SAMN23138735	PRJNA780348	USA	North America	79	144.271	14.4597	2177.46	335.713	15.0928	163.198
SRR16944415	SAMN23138777	PRJNA780348	China	Asia	79	119.963	10.5917	1816.1	399.886	15.1388	144.06
SRR16944322	SAMN23138645	PRJNA780348	France	Europe	76	108.833	12.3129	1651.98	266.465	15.179	123.397
SRR16944321	SAMN23138646	PRJNA780348	France	Europe	79	100.88	14.055	1534.37	234.518	15.21	113.181
SRR16944400	SAMN23138791	PRJNA780348	Cote d'Ivoire	Africa	68	136.103	12.6951	2075.89	242.495	15.2523	155.068
SRR16944382	SAMN23138721	PRJNA780348	Belgium	Europe	77	171.385	12.3531	2621.31	294.12	15.2949	197.077
SRR16944354	SAMN23138746	PRJNA780348	USA	North America	78	133.697	17.9289	2045.77	266.966	15.3016	153.463
SRR16944266	SAMN23138769	PRJNA780348	USA	North America	79	147.522	19.8249	2270.55	286.811	15.3913	177.918
SRR16944287	SAMN23138751	PRJNA780348	USA	North America	78	124.377	9.8495	1921.72	261.465	15.4508	147.239
SRR16944276	SAMN23138761	PRJNA780348	USA	North America	79	149.403	18.9112	2308.52	287.994	15.4516	178.518
SRR16944294	SAMN23138574	PRJNA780348	France	Europe	79	165.723	14.5542	2567.52	337.011	15.4929	175.031
SRR16944372	SAMN23138730	PRJNA780348	USA	North America	79	152.608	20.2681	2375.17	303.645	15.5639	188.671
SRR16944407	SAMN23138784	PRJNA780348	Cote d'Ivoire	Africa	79	119.743	8.39489	1871.52	207.875	15.6294	141.649
SRR16944414	SAMN23138778	PRJNA780348	China	Asia	79	137.914	10.1566	2157.31	240.812	15.6424	169.822
SRR16944369	SAMN23138732	PRJNA780348	USA	North America	79	150.653	16.7796	2357.18	296.435	15.6465	187.538
SRR16944461	SAMN23138616	PRJNA780348	France	Europe	68	123.135	13.7392	1926.96	212.416	15.6492	134.959
SRR16944346	SAMN23138655	PRJNA780348	France	Europe	28	112.65	12.6677	1781.29	302.902	15.8127	123.333
SRR16944401	SAMN23138790	PRJNA780348	Cote d'Ivoire	Africa	79	121.083	9.40448	1931.76	228.972	15.9541	146.326
SRR16944333	SAMN23138635	PRJNA780348	France	Europe	11	102.325	11.62	1633.64	216.749	15.9652	114.244
SRR16944435	SAMN23138694	PRJNA780348	France	Europe	9	115.279	14.9378	1841.27	427.401	15.9723	132.947
SRR16944442	SAMN23138688	PRJNA780348	France	Europe	11	118.885	12.2281	1899.18	256.921	15.9749	136.704
SRR16944347	SAMN23138654	PRJNA780348	France	Europe	4	134.346	11.4746	2148.81	314.974	15.9946	151.777
SRR16944444	SAMN23138686	PRJNA780348	France	Europe	41	134.224	8.13761	2155.95	661.955	16.0624	147.687
SRR16944439	SAMN23138691	PRJNA780348	France	Europe	11	112.271	12.2853	1813.07	267.021	16.1491	133.429
SRR16944460	SAMN23138617	PRJNA780348	France	Europe	11	107.374	8.95183	1738.49	172.707	16.191	117.764
SRR16944404	SAMN23138787	PRJNA780348	Cote d'Ivoire	Africa	79	83.286	11.5948	1349.68	173.612	16.2054	100.399
SRR16944281	SAMN23138756	PRJNA780348	USA	North America	79	82.8555	9.60989	1344.09	243.594	16.2221	96.8555
SRR16944464	SAMN23138613	PRJNA780348	France	Europe	79	134.662	20.077	2186.74	241.405	16.2388	148.617
SRR16944446	SAMN23138684	PRJNA780348	France	Europe	41	132.989	17.9937	2164.96	502.19	16.2793	157.219
SRR16944375	SAMN23138727	PRJNA780348	USA	North America	59	138.112	15.9776	2248.61	655.271	16.281	171.415
SRR16944348	SAMN23138653	PRJNA780348	France	Europe	4	121.484	12.9066	1984.33	306.873	16.3342	141.082
SRR16944278	SAMN23138759	PRJNA780348	USA	North America	79	150.584	21.8865	2460.07	307.782	16.3368	185.534
SRR16944377	SAMN23138725	PRJNA780348	USA	North America	79	130.337	13.4975	2134.49	276.01	16.3767	154.046
SRR16944291	SAMN23138562	PRJNA780348	France	Europe	79	114.749	9.64713	1887.86	220.489	16.4522	131.301
SRR16944422	SAMN23138771	PRJNA780348	USA	North America	79	138.11	12.0143	2277.46	262.618	16.4902	164.108
SRR16944438	SAMN23138575	PRJNA780348	France	Europe	75	159.87	15.2896	2639.53	280.01	16.5104	183.425
SRR16944337	SAMN23138569	PRJNA780348	France	Europe	75	138.314	11.3125	2284	271.017	16.5131	153.721
SRR16944424	SAMN23138704	PRJNA780348	France	Europe	10	138.403	13.0268	2287.87	254.711	16.5305	143.511
SRR16944468	SAMN23138610	PRJNA780348	France	Europe	66	125.046	14.8705	2072.65	228.111	16.5751	133.62
SRR16944345	SAMN23138656	PRJNA780348	France	Europe	77	106.797	14.6862	1777.32	307.239	16.642	118.666
SRR16944492	SAMN23138588	PRJNA780348	France	Europe	11	137.009	12.9722	2286.34	254.754	16.6876	145.543
SRR16944283	SAMN23138754	PRJNA780348	USA	North America	21	101.659	11.3841	1701.54	405.931	16.7377	120.476
SRR16944458	SAMN23138619	PRJNA780348	France	Europe	68	122.667	10.7376	2058.05	234.493	16.7775	130.538
SRR16944411	SAMN23138781	PRJNA780348	China	Asia	79	124.032	14.9189	2084.53	232.825	16.8063	141.329
SRR16944341	SAMN23138660	PRJNA780348	France	Europe	4	126.284	13.6172	2124.49	324.258	16.8231	145.786
SRR16944403	SAMN23138788	PRJNA780348	Cote d'Ivoire	Africa	79	119.508	12.5617	2013.8	233.185	16.8507	143.439
SRR16944315	SAMN23138662	PRJNA780348	France	Europe	11	119.29	8.13998	2019.67	312.671	16.9307	131.904
SRR16944479	SAMN23138600	PRJNA780348	France	Europe	79	127.747	12.4167	2163.93	196.396	16.9392	139.214
SRR16944451	SAMN23138625	PRJNA780348	France	Europe	64	130.807	13.5451	2226.04	278.635	17.0177	138.116
SRR16944443	SAMN23138687	PRJNA780348	France	Europe	11	113.929	11.2059	1941.37	288.7	17.0402	136.898
SRR16944325	SAMN23138642	PRJNA780348	France	Europe	68	120.759	12.8109	2057.93	303.704	17.0416	141.447
SRR16944289	SAMN23138572	PRJNA780348	France	Europe	11	129.05	16.163	2206.16	238.264	17.0954	149.09
SRR16944427	SAMN23138576	PRJNA780348	France	Europe	11	118.856	10.9472	2039.37	215.843	17.1583	135.962
SRR16944453	SAMN23138623	PRJNA780348	France	Europe	79	112.064	13.1178	1922.91	248.52	17.1591	134.847
SRR16944367	SAMN23138734	PRJNA780348	USA	North America	79	152.854	15.3782	2627.92	400.644	17.1923	179.746
SRR16944475	SAMN23138603	PRJNA780348	France	Europe	76	121.67	15.0856	2095.28	196.539	17.221	135.678
SRR16944305	SAMN23138573	PRJNA780348	France	Europe	11	158.92	18.3174	2742.92	285.761	17.2597	182.335
SRR16944409	SAMN23138782	PRJNA780348	China	Asia	78	122.757	15.1824	2124.19	530.092	17.304	149.492
SRR16944477	SAMN23138566	PRJNA780348	France	Europe	11	122.032	13.7023	2123.09	211.904	17.3979	134.024
SRR16944405	SAMN23138786	PRJNA780348	Cote d'Ivoire	Africa	68	126.782	13.4443	2214.44	247.635	17.4665	160.294
SRR16944329	SAMN23138639	PRJNA780348	France	Europe	68	112.055	11.605	1960.2	210.066	17.4932	129.016
SRR16944320	SAMN23138647	PRJNA780348	France	Europe	5	109.387	10.8414	1913.74	259.803	17.4951	134.962
SRR16944297	SAMN23138679	PRJNA780348	France	Europe	9	112.237	9.32933	1964.01	554.873	17.4987	115.653
SRR16944469	SAMN23138609	PRJNA780348	France	Europe	11	130.044	11.9292	2281.62	227.23	17.545	146.106
SRR16944392	SAMN23138577	PRJNA780348	France	Europe	79	157.328	19.2648	2761.1	310.711	17.55	177.87
SRR16944326	SAMN23138570	PRJNA780348	France	Europe	50	113.214	13.2969	1988.72	436.164	17.566	133.888
SRR16944441	SAMN23138689	PRJNA780348	France	Europe	11	121.077	8.863	2140.02	312.664	17.6749	136.429
SRR16944316	SAMN23138651	PRJNA780348	France	Europe	21	132.143	11.4924	2351.87	508.247	17.798	150.544
SRR16944277	SAMN23138760	PRJNA780348	USA	North America	66	150.001	17.1246	2670.73	521.731	17.8047	193.993
SRR16944488	SAMN23138565	PRJNA780348	France	Europe	79	123.034	11.6275	2192.25	239.697	17.8182	147.886
SRR16944413	SAMN23138779	PRJNA780348	China	Asia	78	139.471	13.1716	2485.34	280.406	17.8198	163.477
SRR16944440	SAMN23138690	PRJNA780348	France	Europe	11	117.336	14.3498	2092.35	290.592	17.8322	130.945
SRR16944494	SAMN23138586	PRJNA780348	France	Europe	5	142.055	12.9798	2533.88	263.451	17.8374	154.725
SRR16944359	SAMN23138580	PRJNA780348	France	Europe	5	177.256	17.6838	3166.4	344.145	17.8634	207.621
SRR16944388	SAMN23138715	PRJNA780348	Belgium	Europe	79	165.188	16.3422	2951.1	368.218	17.8651	191.302
SRR16944317	SAMN23138650	PRJNA780348	France	Europe	60	110.826	8.62952	1981.21	473.418	17.8767	133.467
SRR16944313	SAMN23138664	PRJNA780348	France	Europe	75	122.187	16.7323	2192.55	274.903	17.9442	138.517
SRR16944487	SAMN23138592	PRJNA780348	France	Europe	11	128.368	11.6734	2316.61	251.282	18.0467	139.479
SRR16944416	SAMN23138776	PRJNA780348	China	Asia	78	124.327	15.317	2246.46	274.801	18.069	157.949
SRR16944344	SAMN23138657	PRJNA780348	France	Europe	76	117.516	13.0522	2123.88	297.528	18.0732	140.256
SRR16944473	SAMN23138605	PRJNA780348	France	Europe	79	122.718	9.79998	2229.89	229.739	18.1709	136.151
SRR16944319	SAMN23138648	PRJNA780348	France	Europe	11	96.5627	11.9427	1777.09	239.639	18.4035	115.225
SRR16944312	SAMN23138665	PRJNA780348	France	Europe	4	126.137	13.6883	2327.19	294.313	18.4498	134.635
SRR16944466	SAMN23138567	PRJNA780348	France	Europe	11	119.068	20.5955	2203.95	212.601	18.5101	136.934
SRR16944459	SAMN23138618	PRJNA780348	France	Europe	66	131.576	15.6767	2439.82	269.162	18.5431	147.558
SRR16944476	SAMN23138602	PRJNA780348	France	Europe	75	131.196	13.6613	2434.8	276.039	18.5585	161.12
SRR16944387	SAMN23138716	PRJNA780348	Belgium	Europe	77	162.014	15.6645	3007.23	292.401	18.5616	202.014
SRR16944381	SAMN23138578	PRJNA780348	France	Europe	64	117.857	11.6977	2195.55	313.759	18.6289	143.553
SRR16944384	SAMN23138719	PRJNA780348	Belgium	Europe	77	146.256	12.7308	2726.13	260.922	18.6395	173.593
SRR16944342	SAMN23138659	PRJNA780348	France	Europe	68	122.608	11.9278	2288.54	340.896	18.6656	137.25
SRR16944314	SAMN23138663	PRJNA780348	France	Europe	5	142.815	11.7031	2680.96	372.561	18.7723	157.067
SRR16944370	SAMN23138579	PRJNA780348	France	Europe	64	133.269	12.8755	2510.13	283.893	18.835	148.919
SRR16944295	SAMN23138681	PRJNA780348	France	Europe	78	121.374	12.5471	2289.32	307.283	18.8617	135.719
SRR16944339	SAMN23138630	PRJNA780348	France	Europe	11	114.725	10.129	2164.64	210.895	18.8681	125.627
SRR16944296	SAMN23138680	PRJNA780348	France	Europe	11	118.934	13.1858	2244.69	338.175	18.8734	140.925
SRR16944310	SAMN23138667	PRJNA780348	France	Europe	79	119.454	10.7126	2255.5	375.435	18.8818	134.644
SRR16944383	SAMN23138720	PRJNA780348	Belgium	Europe	77	146.421	13.5277	2767.66	282.905	18.902	182.449
SRR16944338	SAMN23138631	PRJNA780348	France	Europe	79	99.9883	8.35199	1897.03	239.786	18.9725	113.281
SRR16944491	SAMN23138589	PRJNA780348	France	Europe	79	142.057	13.7736	2702.81	275.055	19.0263	152.432
SRR16944282	SAMN23138755	PRJNA780348	USA	North America	28	145.765	9.57474	2784.01	585.021	19.0993	191.092
SRR16944300	SAMN23138676	PRJNA780348	France	Europe	41	124.204	12.8392	2378.07	597.275	19.1465	138.521
SRR16944274	SAMN23138582	PRJNA780348	France	Europe	75	112.211	9.06436	2149.04	228.096	19.1518	127.997
SRR16944447	SAMN23138629	PRJNA780348	France	Europe	57	108.912	8.34224	2087.83	439.352	19.1698	122.214
SRR16944456	SAMN23138621	PRJNA780348	France	Europe	79	112.144	11.5105	2153.05	197.079	19.199	131.317
SRR16944311	SAMN23138666	PRJNA780348	France	Europe	75	120.673	11.1164	2319.46	372.726	19.2211	132.447
SRR16944371	SAMN23138731	PRJNA780348	USA	North America	54	135.805	11.4224	2610.74	592.433	19.2241	167.184
SRR16944298	SAMN23138678	PRJNA780348	France	Europe	42	126.08	12.1507	2423.82	542.862	19.2245	145.75
SRR16944423	SAMN23138705	PRJNA780348	France	Europe	10	113.843	9.878	2198.28	242.755	19.3098	133.012
SRR16944290	SAMN23138563	PRJNA780348	France	Europe	11	196.159	17.2969	3814.2	387.012	19.4444	222.612
SRR16944486	SAMN23138593	PRJNA780348	France	Europe	79	129.128	17.3528	2511.82	295.74	19.4521	145.033
SRR16944349	SAMN23138652	PRJNA780348	France	Europe	38	95.3453	9.99734	1855.07	232.141	19.4564	106.054
SRR16944398	SAMN23138706	PRJNA780348	France	Europe	64	131.482	17.6575	2570.85	271.169	19.5528	140.381
SRR16944490	SAMN23138590	PRJNA780348	France	Europe	79	113.887	12.4468	2228.46	222.683	19.5673	130.975
SRR16944480	SAMN23138599	PRJNA780348	France	Europe	65	114.308	8.86204	2237.22	204.651	19.5719	130.798
SRR16944471	SAMN23138607	PRJNA780348	France	Europe	11	121.662	9.30669	2386.79	224.203	19.6182	158.186
SRR16944489	SAMN23138591	PRJNA780348	France	Europe	11	136.427	12.5473	2692.55	275.78	19.7362	155.554
SRR16944396	SAMN23138708	PRJNA780348	France	Europe	79	136.828	9.53754	2704.99	450.827	19.7693	152.367
SRR16944362	SAMN23138739	PRJNA780348	USA	North America	79	152.524	9.65556	3022.49	399.807	19.8164	172.77
SRR16944465	SAMN23138612	PRJNA780348	France	Europe	68	135.946	10.933	2698.19	288.757	19.8476	159.417
SRR16944462	SAMN23138615	PRJNA780348	France	Europe	68	99.3292	14.1541	1973.73	218.844	19.8706	125.755
SRR16944426	SAMN23138702	PRJNA780348	France	Europe	66	135.511	10.8837	2694.9	355.015	19.8869	140.789
SRR16944286	SAMN23138581	PRJNA780348	France	Europe	10	127.375	18.6417	2536.33	270.868	19.9123	143.742
SRR16944410	SAMN23138584	PRJNA780348	France	Europe	10	120.429	11.4031	2407.64	246.97	19.9921	140.062
SRR16944482	SAMN23138597	PRJNA780348	France	Europe	68	125.154	12.4918	2513.29	357.203	20.0815	139.787
SRR16944386	SAMN23138717	PRJNA780348	Belgium	Europe	77	220.326	15.8881	4435.19	395.63	20.1302	274.505
SRR16944457	SAMN23138620	PRJNA780348	France	Europe	5	109.448	10.4887	2206.91	231.955	20.1641	123.379
SRR16944318	SAMN23138649	PRJNA780348	France	Europe	11	111.112	9.45357	2243.09	296.099	20.1877	139.972
SRR16944324	SAMN23138643	PRJNA780348	France	Europe	66	120.917	10.1879	2446.96	394.226	20.2366	136.059
SRR16944279	SAMN23138758	PRJNA780348	USA	North America	38	235.862	29.1075	4789.22	580.466	20.3052	296.931
SRR16944335	SAMN23138633	PRJNA780348	France	Europe	4	116.19	12.2175	2362.84	234.076	20.3361	134.501
SRR16944343	SAMN23138658	PRJNA780348	France	Europe	68	130.948	20.3364	2682.35	424.689	20.4841	145.684
SRR16944336	SAMN23138632	PRJNA780348	France	Europe	79	107.131	11.3811	2197.6	229.912	20.5133	119.663
SRR16944454	SAMN23138622	PRJNA780348	France	Europe	77	100.712	11.0653	2065.96	217.864	20.5136	125.563
SRR16944385	SAMN23138718	PRJNA780348	Belgium	Europe	77	177.713	18.3083	3646.92	308.151	20.5214	217.222
SRR16944455	SAMN23138568	PRJNA780348	France	Europe	28	146.565	16.4776	3020.79	289.771	20.6106	168.216
SRR16944323	SAMN23138644	PRJNA780348	France	Europe	28	127.387	12.404	2626.87	273.278	20.6211	146.38
SRR16944328	SAMN23138640	PRJNA780348	France	Europe	16	124.133	16.0542	2568.72	386.505	20.6934	143.572
SRR16944269	SAMN23138766	PRJNA780348	USA	North America	78	164.464	12.1126	3407.99	495.279	20.7217	199.822
SRR16944470	SAMN23138608	PRJNA780348	France	Europe	68	129.93	10.9041	2705.95	286.799	20.8262	149.75
SRR16944474	SAMN23138604	PRJNA780348	France	Europe	66	124.886	13.2993	2612.82	213.337	20.9216	144.526
SRR16944332	SAMN23138636	PRJNA780348	France	Europe	77	89.0185	8.78079	1864.86	230.435	20.9491	105.972
SRR16944448	SAMN23138628	PRJNA780348	France	Europe	28	100.062	10.8639	2109.25	212.69	21.0795	122.246
SRR16944425	SAMN23138703	PRJNA780348	France	Europe	77	129.056	10.956	2720.56	341.088	21.0804	142.102
SRR16944390	SAMN23138713	PRJNA780348	France	Europe	11	111.007	10.5235	2349.46	278.98	21.165	124.715
SRR16944397	SAMN23138707	PRJNA780348	France	Europe	79	112.038	9.52749	2372.08	308.157	21.1722	124.722
SRR16944302	SAMN23138674	PRJNA780348	France	Europe	41	112.337	11.5017	2380.94	527.604	21.1946	129.513
SRR16944376	SAMN23138726	PRJNA780348	USA	North America	79	160.8	13.691	3430.88	424.645	21.3363	179.622
SRR16944484	SAMN23138595	PRJNA780348	France	Europe	79	115.295	13.6399	2476.6	266.563	21.4806	130.11
SRR16944432	SAMN23138697	PRJNA780348	France	Europe	79	131.972	11.1834	2845.03	329.512	21.5578	155.097
SRR16944428	SAMN23138701	PRJNA780348	France	Europe	11	117.639	9.97386	2542.87	292.587	21.6158	137.656
SRR16944481	SAMN23138598	PRJNA780348	France	Europe	79	114.145	13.7179	2468.93	246.65	21.6297	138.69
SRR16944431	SAMN23138698	PRJNA780348	France	Europe	68	123.091	9.14106	2665.91	327.526	21.658	140.934
SRR16944445	SAMN23138685	PRJNA780348	France	Europe	41	107.44	12.8827	2342.49	548.682	21.8027	130.238
SRR16944395	SAMN23138709	PRJNA780348	France	Europe	68	123.9	11.3003	2708.79	366.395	21.8627	142.302
SRR16944452	SAMN23138624	PRJNA780348	France	Europe	38	96.2261	10.777	2106.61	286.538	21.8923	125.081
SRR16944306	SAMN23138671	PRJNA780348	France	Europe	11	136.288	14.9605	3021.26	575.038	22.1681	148.647
SRR16944421	SAMN23138583	PRJNA780348	France	Europe	11	151.252	10.269	3357	342.576	22.1947	169.712
SRR16944393	SAMN23138711	PRJNA780348	France	Europe	68	159.981	12.454	3574.47	493.194	22.3431	177.021
SRR16944301	SAMN23138675	PRJNA780348	France	Europe	16	121.64	13.6237	2750.67	462.913	22.6133	133.471
SRR16944391	SAMN23138712	PRJNA780348	France	Europe	68	127.713	13.9595	2897.27	352.334	22.6858	149.819
SRR16944350	SAMN23138571	PRJNA780348	France	Europe	16	152.287	10.6275	3473.89	396.943	22.8114	170.405
SRR16944485	SAMN23138594	PRJNA780348	France	Europe	56	121.043	10.9035	2770.02	594.822	22.8846	139.655
SRR16944463	SAMN23138614	PRJNA780348	France	Europe	16	129.933	17.4265	2983.28	353.647	22.9602	144.066
SRR16944483	SAMN23138596	PRJNA780348	France	Europe	77	175.935	14.0872	4068.46	398.837	23.1248	207.878
SRR16944430	SAMN23138699	PRJNA780348	France	Europe	11	89.3076	10.7109	2071.83	257.425	23.1988	111.835
SRR16944429	SAMN23138700	PRJNA780348	France	Europe	79	139.406	14.9165	3237.93	412.904	23.2266	168.09
SRR16944293	SAMN23138682	PRJNA780348	France	Europe	68	134.262	11.6801	3140.24	409.12	23.3889	143.674
SRR16944394	SAMN23138710	PRJNA780348	France	Europe	79	134.565	14.8173	3202.62	428.513	23.7998	153.272
SRR16944275	SAMN23138564	PRJNA780348	France	Europe	16	127.653	22.1676	3039.15	292.903	23.8079	127.688
SRR16944399	SAMN23138585	PRJNA780348	France	Europe	66	136.094	9.90248	3293.74	332.927	24.202	162.43
SRR16944340	SAMN23138661	PRJNA780348	France	Europe	66	109.53	14.3904	2677.16	360.402	24.4423	140.394
SRR16944467	SAMN23138611	PRJNA780348	France	Europe	29	127.405	12.2837	3137.2	638.656	24.6239	141.037
SRR16944334	SAMN23138634	PRJNA780348	France	Europe	38	105.672	11.4359	2606.66	336.269	24.6675	125.754
SRR16944330	SAMN23138638	PRJNA780348	France	Europe	16	125.86	10.7024	3128.34	340.122	24.8558	146.472
SRR16944449	SAMN23138627	PRJNA780348	France	Europe	79	113.186	8.17308	2854.21	322.146	25.217	136.511
SRR16944478	SAMN23138601	PRJNA780348	France	Europe	68	178.97	16.0345	4540.77	319.79	25.3717	221.344
SRR16944309	SAMN23138668	PRJNA780348	France	Europe	5	128.055	9.83316	3355.07	407.591	26.2003	146.517
SRR16944304	SAMN23138672	PRJNA780348	France	Europe	11	105.755	8.57468	2824.48	352.803	26.7078	117.904
SRR16944450	SAMN23138626	PRJNA780348	France	Europe	16	119.533	7.75956	3238.23	389.091	27.0907	135.814
SRR16944331	SAMN23138637	PRJNA780348	France	Europe	79	134.447	12.9429	4240.24	438.93	31.5385	152.921
SRR16944436	SAMN23138693	PRJNA780348	France	Europe	38	101.029	8.76191	8259.19	1012.72	81.7507	120.318
SRR16944303	SAMN23138673	PRJNA780348	France	Europe	38	111.615	11.5389	14138.8	1948.98	126.675	150.398
SRR17181027	SAMN23825150	PRJNA787571	France	Europe	16	303.702	38.2069	5676.23	2411.24	18.6902	333.519	DOI: 10.1128/spectrum.05128-22
SRR17181026	SAMN23825151	PRJNA787571	France	Europe	16	280.668	26.8832	5482.28	2233.12	19.533	291.437
SRR17181022	SAMN23825155	PRJNA787571	United Kingdom	Europe	77	280.7	26.1918	5681.72	2135.48	20.2413	320.293
SRR17181023	SAMN23825154	PRJNA787571	Austria	Europe	68	308.859	29.8831	6699.36	2022.18	21.6907	346.43
SRR17181029	SAMN23825148	PRJNA787571	France	Europe	75	272.872	30.9665	7056.41	2495.87	25.8598	293.433
SRR17181024	SAMN23825153	PRJNA787571	Austria	Europe	68	295.697	30.082	7759.33	1763.81	26.2408	316.929
SRR17181028	SAMN23825149	PRJNA787571	France	Europe	66	267.208	27.3467	7168.81	2706.69	26.8286	301.061
SRR17181031	SAMN23825147	PRJNA787571	France	Europe	68	285.195	24.4966	7725.62	2418.75	27.0889	338.935
SRR17181030	SAMN23825156	PRJNA787571	United Kingdom	Europe	66	343.728	33.2171	9723.06	2312.07	28.2871	382.435
SRR17181032	SAMN23825146	PRJNA787571	France	Europe	38	269.611	30.214	7881.59	2217.88	29.2332	303.271
SRR17181025	SAMN23825152	PRJNA787571	France	Europe	64	297.757	37.2967	9608.1	2050.66	32.2683	333.329
SRR17391685	SAMN24529887	PRJNA793345	Unknown	Unknown	38	37.5145	9.35135	612.531	217.707	16.3279	43.0344	doi: 10.1371/journal.pgen.1010001
SRR17391684	SAMN24529888	PRJNA793345	Unknown	Unknown	42	61.5479	11.2196	2077.19	444.499	33.7492	80.5817
SRR17391683	SAMN24529888	PRJNA793345	Unknown	Unknown	42	75.5621	14.9908	2583.48	540.561	34.1901	94.6459
SRR17391686	SAMN24529887	PRJNA793345	Unknown	Unknown	38	37.8783	8.86574	1435.27	136.597	37.8915	46.503
SRR17660939	SAMN25106834	PRJNA798608	Unknown	Unknown	11	110.553	22.8571	820.503	592.165	7.42182	103.324	DOI: 10.3389/fcimb.2022.841138
SRR17660943	SAMN25106828	PRJNA798608	Unknown	Unknown	11	117.134	11.3627	932.753	642.203	7.96313	110.451
SRR17660954	SAMN25106840	PRJNA798608	Unknown	Unknown	11	104.412	10.6672	1132.27	643.697	10.8443	101.77
SRR17660955	SAMN25106837	PRJNA798608	Unknown	Unknown	11	157.561	22.4169	1987.8	961.942	12.6161	153.715
SRR17660944	SAMN25106831	PRJNA798608	Unknown	Unknown	11	132.877	8.77055	1692.12	808.855	12.7345	129.678
SRR17660940	SAMN25106818	PRJNA798608	Unknown	Unknown	11	115.686	12.5616	1598.99	906.95	13.8219	119.737
SRR17660953	SAMN25106844	PRJNA798608	Unknown	Unknown	11	115.888	7.70151	1722.54	671.723	14.8638	105.289
SRR17660950	SAMN25106854	PRJNA798608	Unknown	Unknown	11	71.0772	9.50042	1132.95	510.611	15.9398	69.9518
SRR17660942	SAMN25106825	PRJNA798608	Unknown	Unknown	11	120.565	13.3522	2275.4	1002.22	18.8728	123.688
SRR17660952	SAMN25106847	PRJNA798608	Unknown	Unknown	11	94.5361	8.06343	1801.3	702.081	19.0541	90.4866
SRR17660951	SAMN25106850	PRJNA798608	Unknown	Unknown	11	106.358	13.3675	2057.98	751.277	19.3495	98.5692
SRR17660948	SAMN25106861	PRJNA798608	Unknown	Unknown	11	10.6702	4.03843	298.914	30.8984	28.014	8.46881
SRR17660941	SAMN25106821	PRJNA798608	Unknown	Unknown	11	95.4361	13.1851	2902.89	890.578	30.4171	96.4475
SRR17660947	SAMN25106864	PRJNA798608	Unknown	Unknown	11	5.98641	2.30918	189.665	27.9284	31.6827	7.20945
SRR17660949	SAMN25106857	PRJNA798608	Unknown	Unknown	11	6.31686	1.95507	230.788	26.618	36.5352	8.433
SRR17660945	SAMN25106873	PRJNA798608	Ireland	Europe	11	20.9074	3.87554	1063.6	109.081	50.872	21.2391
SRR17660956	SAMN25106867	PRJNA798608	Unknown	Unknown	11	16.4317	4.49276	862.29	98.802	52.477	16.8562
SRR17660946	SAMN25106870	PRJNA798608	Unknown	Unknown	11	19.7536	3.65954	1102.59	123.58	55.8171	21.1254
SRR20117968	SAMN29674052	PRJNA858199	USA	North America	79	311.263	42.5145	2888.23	1187.8	9.27907	384.515	https://doi.org/10.1093/mmy/myad012
SRR20117980	SAMN29674063	PRJNA858199	USA	North America	64	248.972	36.4784	2325.02	927.183	9.33851	266.325
SRR20117977	SAMN29674065	PRJNA858199	USA	North America	38	279.075	27.0513	2672.78	1018.66	9.57727	308.475
SRR20117964	SAMN29674054	PRJNA858199	USA	North America	64	141.379	19.7523	1376.57	519.901	9.73674	182.862
SRR20117976	SAMN29674049	PRJNA858199	USA	North America	79	312.256	27.8163	3118.18	953.304	9.98599	331.572
SRR20117973	SAMN29674066	PRJNA858199	USA	North America	20	223.296	28.5122	2384.27	912.859	10.6776	235.685
SRR20117962	SAMN29674060	PRJNA858199	USA	North America	38	239.977	27.2097	2599.91	796.12	10.834	271.719
SRR20117981	SAMN29674062	PRJNA858199	USA	North America	64	135.673	12.3758	1522.03	463.624	11.2184	156.992
SRR20117966	SAMN29674053	PRJNA858199	USA	North America	64	302.812	44.1681	3658.7	1101.17	12.0824	343.759
SRR20117967	SAMN29674069	PRJNA858199	USA	North America	78	231.398	35.1652	2801.3	848.699	12.106	238.721
SRR20117983	SAMN29674055	PRJNA858199	USA	North America	68	270.285	35.5346	3292.79	919.63	12.1827	294.989
SRR20117970	SAMN29674051	PRJNA858199	USA	North America	68	208.763	27.5054	2670.46	973.421	12.7918	242.144
SRR20117963	SAMN29674059	PRJNA858199	USA	North America	68	267.744	39.7959	3576.97	1297.19	13.3597	386.75
SRR20117975	SAMN29674050	PRJNA858199	USA	North America	68	266.623	33.8015	3595.57	901.53	13.4856	289.337
SRR20117961	SAMN29674061	PRJNA858199	USA	North America	75	302.568	42.7117	4114.08	1075.51	13.5972	332.732
SRR20117972	SAMN29674067	PRJNA858199	USA	North America	64	191.791	29.6977	2655.89	1200.97	13.8479	221.926
SRR20117965	SAMN29674046	PRJNA858199	USA	North America	68	222.942	31.0204	3211.59	856.461	14.4055	265.671
SRR20117982	SAMN29674057	PRJNA858199	USA	North America	64	260.205	39.0367	3777.81	876.87	14.5186	275.63
SRR20117960	SAMN29674048	PRJNA858199	USA	North America	79	246.572	35.8782	3667.14	803.786	14.8725	268.569
SRR20117979	SAMN29674056	PRJNA858199	USA	North America	38	224.127	27.1909	3422.84	937.538	15.2719	249.426
SRR20117978	SAMN29674064	PRJNA858199	USA	North America	28	254.157	27.1705	3902.16	962.655	15.3534	289.34
SRR20117974	SAMN29674047	PRJNA858199	USA	North America	68	228.236	18.1622	3554.43	700.604	15.5735	248.766
SRR20117971	SAMN29674058	PRJNA858199	USA	North America	79	177.086	20.0244	2806.26	629.727	15.8468	232.114
SRR20117969	SAMN29674068	PRJNA858199	USA	North America	64	232.923	18.1244	5342.65	1517.48	22.9374	266.45
SRR22525905	SAMN32036250	PRJNA908647	United Kingdom	Europe	11	131.666	22.9392	185.615	45.9738	1.40973	184.083	https://doi.org/10.1128/spectrum.04770-22
SRR22525892	SAMN32036242	PRJNA908647	United Kingdom	Europe	76	137.885	16.1338	212.916	34.6439	1.54415	166.126
SRR22525898	SAMN32036256	PRJNA908647	United Kingdom	Europe	79	152.665	16.5091	270.916	77.0626	1.77458	180.025
SRR22525906	SAMN32036249	PRJNA908647	United Kingdom	Europe	71	150.015	21.7	305.454	112.019	2.03616	179.488
SRR22525909	SAMN32036246	PRJNA908647	United Kingdom	Europe	76	151.324	25.5342	317.542	46.4603	2.09843	183.443
SRR22525903	SAMN32036252	PRJNA908647	United Kingdom	Europe	77	119.216	16.5529	260.023	42.6134	2.18111	172.402
SRR22525910	SAMN32036245	PRJNA908647	United Kingdom	Europe	11	141.316	20.1478	319.512	71.5836	2.26098	159.841
SRR22525899	SAMN32036255	PRJNA908647	United Kingdom	Europe	11	152.095	20.0975	374.434	61.1103	2.46185	180.782
SRR22525911	SAMN32036236	PRJNA908647	USA	North America	77	136.294	15.8748	490.905	55.4922	3.60181	160.028
SRR22525897	SAMN32036257	PRJNA908647	United Kingdom	Europe	79	156.084	20.944	567.347	207.303	3.63488	174.408
SRR22525894	SAMN32036240	PRJNA908647	United Kingdom	Europe	75	138.547	18.058	507.856	133.363	3.66558	146.429
SRR22525901	SAMN32036254	PRJNA908647	United Kingdom	Europe	11	164.807	23.8036	610.924	81.6042	3.70691	175.558
SRR22525902	SAMN32036253	PRJNA908647	United Kingdom	Europe	4	60.1421	12.1018	224.849	56.4697	3.73863	85.7877
SRR22525893	SAMN32036241	PRJNA908647	United Kingdom	Europe	76	155.165	24.2152	627.622	121.508	4.04487	178.354
SRR22525900	SAMN32036237	PRJNA908647	Ireland	Europe	4	137.056	15.8422	676.468	61.349	4.9357	154.319
SRR22525904	SAMN32036251	PRJNA908647	United Kingdom	Europe	4	154.178	18.0525	817.955	360.227	5.30527	186.506
SRR22525896	SAMN32036238	PRJNA908647	Thailand	Asia	79	136.708	15.9985	743.609	72.6367	5.43938	161.816
SRR22525891	SAMN32036243	PRJNA908647	United Kingdom	Europe	79	185.636	28.5012	1154.02	110.54	6.21657	208.238
SRR22525912	SAMN32036235	PRJNA908647	Sweden	Europe	78	129.284	19.5285	865.682	83.7472	6.69597	155.327
SRR22525907	SAMN32036248	PRJNA908647	United Kingdom	Europe	76	159.591	17.9866	1115.49	101.465	6.98969	176.568
SRR22525895	SAMN32036239	PRJNA908647	Germany	Europe	11	120.337	15.718	878.391	85.9104	7.29941	150.24
SRR22525908	SAMN32036247	PRJNA908647	United Kingdom	Europe	5	152.421	21.7926	1448.1	111.282	9.50066	175.711
SRR22525890	SAMN32036244	PRJNA908647	United Kingdom	Europe	75	140.236	16.4985	1598.29	223.673	11.3972	154.508
SRR23941186	SAMN33864161	PRJNA947514	United Kingdom	Europe	11	49.9456	6.25584	346.941	209.611	6.94638	64.679	SRA
SRR23941176	SAMN33864169	PRJNA947514	United Kingdom	Europe	11	47.7313	6.41008	335.871	193.191	7.03669	61.6319
SRR23941185	SAMN33864162	PRJNA947514	United Kingdom	Europe	11	48.9889	7.57875	344.909	216.993	7.04056	59.7581
SRR23941179	SAMN33864166	PRJNA947514	United Kingdom	Europe	11	52.428	6.83237	433.258	251.123	8.26386	73.5634
SRR23941178	SAMN33864167	PRJNA947514	United Kingdom	Europe	11	47.7566	6.37682	394.915	237.768	8.26933	65.841
SRR23941175	SAMN33864170	PRJNA947514	United Kingdom	Europe	11	48.3107	15.5713	429.531	255.261	8.89101	78.3421
SRR23941181	SAMN33864164	PRJNA947514	United Kingdom	Europe	11	38.2922	9.42195	345.478	195.391	9.02215	51.4138
SRR23941177	SAMN33864168	PRJNA947514	United Kingdom	Europe	11	51.5028	9.05753	551.772	346.186	10.7134	77.2981
SRR23941183	SAMN33864172	PRJNA947514	United Kingdom	Europe	11	33.832	8.76088	394.909	241.689	11.6726	55.2059
SRR23941184	SAMN33864171	PRJNA947514	United Kingdom	Europe	11	51.2569	9.43566	707.165	398.995	13.7965	67.2072
SRR23941182	SAMN33864163	PRJNA947514	United Kingdom	Europe	11	32.0037	6.76536	572.728	325.827	17.8957	55.9901
SRR23941180	SAMN33864165	PRJNA947514	United Kingdom	Europe	11	35.551	4.63904	866.044	371.336	24.3606	54.6487
SRR23944284	SAMN33866175	PRJNA947515	United Kingdom	Europe	79	53.6665	13.5363	310.683	213.823	5.78914	63.8021	SRA
SRR23944285	SAMN33866174	PRJNA947515	United Kingdom	Europe	79	43.9809	7.04534	303.626	208.818	6.9036	52.5466
SRR23944289	SAMN33866162	PRJNA947515	United Kingdom	Europe	79	40.9617	6.6011	284.441	185.31	6.94407	55.8839
SRR23944278	SAMN33866167	PRJNA947515	United Kingdom	Europe	68	53.3101	6.56217	374.775	223.539	7.03011	65.4398
SRR23944279	SAMN33866166	PRJNA947515	United Kingdom	Europe	79	51.2038	8.01284	384.253	243.864	7.50439	74.0699
SRR23944287	SAMN33866172	PRJNA947515	United Kingdom	Europe	79	43.7678	7.80529	338.391	221.576	7.73151	57.4909
SRR23944288	SAMN33866163	PRJNA947515	United Kingdom	Europe	79	48.2353	7.07637	434.548	238.923	9.00892	56.8505
SRR23944280	SAMN33866165	PRJNA947515	United Kingdom	Europe	68	51.218	12.2542	464.36	290.03	9.06634	70.1851
SRR23944275	SAMN33866170	PRJNA947515	United Kingdom	Europe	79	56.0056	9.24548	517.032	322.323	9.23179	85.7708
SRR23944281	SAMN33866164	PRJNA947515	United Kingdom	Europe	79	41.034	7.47667	390.222	242.613	9.50972	58.6005
SRR23944282	SAMN33866177	PRJNA947515	United Kingdom	Europe	79	32.3372	6.94851	312.435	213.135	9.66176	48.914
SRR23944283	SAMN33866176	PRJNA947515	United Kingdom	Europe	79	44.5615	6.33591	436.81	292.968	9.80241	70.0213
SRR23944274	SAMN33866171	PRJNA947515	United Kingdom	Europe	79	45.2119	7.72441	461.77	188.587	10.2135	62.6033
SRR23944277	SAMN33866168	PRJNA947515	United Kingdom	Europe	11	47.8277	8.33585	498.55	316.136	10.4239	70.7754
SRR23944276	SAMN33866169	PRJNA947515	United Kingdom	Europe	79	45.5485	8.98821	510.782	301.321	11.214	72.6911
SRR23944286	SAMN33866173	PRJNA947515	United Kingdom	Europe	79	30.5497	6.88367	455.786	236.105	14.9195	48.9228
SRR23944500	SAMN33866439	PRJNA947770	Netherlands	Europe	2	46.2038	6.75616	1067.71	139.914	23.1087	63.3216	SRA
SRR23944496	SAMN33866443	PRJNA947770	Netherlands	Europe	2	61.7344	7.08215	1437.1	289.238	23.2787	76.9313
SRR23944501	SAMN33866438	PRJNA947770	Netherlands	Europe	2	53.1513	10.2237	1273.04	288.632	23.9512	72.0571
SRR23944499	SAMN33866440	PRJNA947770	Netherlands	Europe	2	44.407	5.40034	1300.84	162.604	29.2936	61.5046
SRR23944497	SAMN33866442	PRJNA947770	Netherlands	Europe	2	58.9265	8.7773	1813.45	224.141	30.7748	79.3555
SRR23944498	SAMN33866441	PRJNA947770	Netherlands	Europe	2	51.9975	7.36225	1672.74	177.452	32.1696	67.136
SRR23944502	SAMN33866437	PRJNA947770	Netherlands	Europe	2	45.2495	5.01008	1497.85	118.551	33.1021	59.2312
